# Supplementary material for: CNApp, a tool for the quantification of copy number alterations and integrative analysis revealing clinical implications
Source: eLife. 2020 Jan 15;9:e50267. doi: 10.7554/eLife.50267 (PMC7010409; doi:10.7554/eLife.50267)
Supplement: Figure 1—figure supplement 1—source data 1. [file elife-50267-fig1-figsupp1-data1.xlsx]

## Sheet: Franch-Exposito et al_Supplemen
Source data 1: Data used for Spearman’s rank correlation analyses between CNA scores and fractions of altered genome.
ID	BCS	FCS	GCS	Broad_hgAltFract	Focal_hgAltFract	hgAltFract
TCGA-02-0001-01C	10	120	-0.070181861538897	483295.002764226	3329365.574598	3812660.57736222
TCGA-02-0003-01A	3	81	-0.586233848807148	161098.334254742	2470174.45857271	2631272.79282745
TCGA-02-0004-01A	2	55	-0.889133928290687	107398.889503161	1664682.787299	1772081.67680216
TCGA-02-0006-01B	6	118	-0.137492990313017	322196.668509484	4349655.02487803	4671851.69338751
TCGA-02-0007-01A	11	103	-0.24967820493655	429595.558012645	3383065.01934958	3812660.57736222
TCGA-02-0009-01A	5	174	0.479525690116414	268497.223757903	5584742.25416438	5853239.47792229
TCGA-02-0010-01A	5	141	0.109314481858755	214797.779006322	3812660.57736222	4027458.35636855
TCGA-02-0011-01B	11	109	-0.18236707616243	536994.447515806	2684972.23757903	3221966.68509484
TCGA-02-0014-01A	2	266	1.47797410026586	107398.889503161	6605031.70444442	6712430.59394758
TCGA-02-0015-01A	5	122	-0.103837425925957	268497.223757903	3490463.90885274	3758961.13261064
TCGA-02-0016-01A	7	88	-0.462830112721262	375896.113261064	2738671.68233061	3114567.79559168
TCGA-02-0021-01A	5	127	-0.0477448186141905	268497.223757903	4510753.35913277	4779250.58289067
TCGA-02-0023-01B	5	102	-0.328207855173023	268497.223757903	2362775.56906955	2631272.79282745
TCGA-02-0024-01B	8	188	0.67024055497642	322196.668509484	5369944.47515806	5692141.14366754
TCGA-02-0025-01A	6	38	-1.03497470730128	322196.668509484	1073988.89503161	1396185.5635411
TCGA-02-0026-01B	3	74	-0.664763499043621	161098.334254742	2201677.2348148	2362775.56906955
TCGA-02-0027-01A	3	66	-0.754511670742447	161098.334254742	1879480.56630532	2040578.90056006
TCGA-02-0028-01A	4	61	-0.79938575659186	214797.779006322	1933180.0110569	2147977.79006322
TCGA-02-0033-01A	7	64	-0.732074627817741	375896.113261064	2201677.2348148	2577573.34807587
TCGA-02-0034-01A	7	178	0.546836818890533	375896.113261064	6390233.92543809	6766130.03869916
TCGA-02-0037-01A	5	126	-0.0589633400765438	268497.223757903	4027458.35636855	4295955.58012645
TCGA-02-0038-01A	6	87	-0.485267155645968	322196.668509484	2684972.23757903	3007168.90608851
TCGA-02-0039-01A	6	39	-1.02375618583893	322196.668509484	1288786.67403793	1610983.34254742
TCGA-02-0043-01A	6	89	-0.462830112721262	322196.668509484	2577573.34807587	2899770.01658535
TCGA-02-0046-01A	4	83	-0.552578284420088	214797.779006322	2846070.57183377	3060868.35084009
TCGA-02-0047-01A	1	32	-1.15837844338717	53699.4447515806	1342486.11878952	1396185.5635411
TCGA-02-0048-01A	5	133	0.0195663101599292	268497.223757903	3007168.90608851	3275666.12984642
TCGA-02-0051-01A	12	87	-0.417956026871849	590693.892267387	2255376.67956639	2846070.57183377
TCGA-02-0052-01A	3	81	-0.586233848807148	161098.334254742	2792371.12708219	2953469.46133693
TCGA-02-0054-01A	8	43	-0.956445057064806	429595.558012645	1610983.34254742	2040578.90056006
TCGA-02-0055-01A	11	88	-0.417956026871849	590693.892267387	3114567.79559168	3705261.68785906
TCGA-02-0057-01A	4	54	-0.877915406828333	214797.779006322	1986879.45580848	2201677.2348148
TCGA-02-0058-01A	4	106	-0.294552290785963	107398.889503161	3275666.12984642	3383065.01934958
TCGA-02-0059-01A	8	37	-1.02375618583893	429595.558012645	1235087.22928635	1664682.787299
TCGA-02-0060-01A	4	203	0.793644291062306	214797.779006322	4618152.24863593	4832950.02764225
TCGA-02-0064-01A	7	165	0.400996039879941	375896.113261064	5906938.92267387	6282835.03593493
TCGA-02-0068-01A	4	77	-0.619889413194208	214797.779006322	2631272.79282745	2846070.57183377
TCGA-02-0069-01A	15	259	1.54528522903998	644393.337018967	7517922.26522129	8162315.60224025
TCGA-02-0070-01A	5	17	-1.28178217947305	268497.223757903	644393.337018967	912890.56077687
TCGA-02-0071-01A	5	149	0.199062653557582	268497.223757903	4725551.13813909	4994048.361897
TCGA-02-0074-01A	9	137	0.109314481858755	483295.002764226	4779250.58289067	5262545.5856549
TCGA-02-0075-01A	10	65	-0.687200541968328	536994.447515806	2094278.34531164	2631272.79282745
TCGA-02-0079-01A	12	192	0.759988726675246	644393.337018967	6121736.70168019	6766130.03869916
TCGA-02-0080-01A	4	121	-0.126274468850663	161098.334254742	4295955.58012645	4457053.91438119
TCGA-02-0083-01A	6	223	1.04045176323408	214797.779006322	7410523.37571812	7679020.59947603
TCGA-02-0084-01A	6	46	-0.945226535602453	322196.668509484	1825781.12155374	2147977.79006322
TCGA-02-0085-01A	2	62	-0.810604278054214	107398.889503161	2255376.67956639	2362775.56906955
TCGA-02-0086-01A	15	97	-0.272115247861256	751792.226522129	3597862.7983559	4349655.02487803
TCGA-02-0087-01A	3	87	-0.518922720033028	161098.334254742	2309076.12431797	2470174.45857271
TCGA-02-0089-01A	4	150	0.199062653557582	214797.779006322	5208846.14090332	5423643.91990964
TCGA-02-0099-01A	7	197	0.759988726675246	375896.113261064	5960638.36742545	6336534.48068651
TCGA-02-0102-01A	4	137	0.0532218745469891	214797.779006322	4457053.91438119	4671851.69338751
TCGA-02-0104-01A	6	157	0.300029346718761	322196.668509484	3866360.0221138	4188556.69062329
TCGA-02-0106-01A	17	200	0.905829505685838	859191.11602529	4725551.13813909	5584742.25416438
TCGA-02-0107-01A	0	69	-0.754511670742447	0	2953469.46133693	2953469.46133693
TCGA-02-0111-01A	8	118	-0.11505594738831	429595.558012645	3544163.35360432	3973758.91161696
TCGA-02-0113-01A	24	101	-0.126274468850663	1288786.67403793	2738671.68233061	4027458.35636855
TCGA-02-0114-01A	8	87	-0.462830112721262	429595.558012645	2631272.79282745	3060868.35084009
TCGA-02-0115-01A	8	156	0.311247868181115	429595.558012645	5369944.47515806	5799540.03317071
TCGA-02-0116-01A	8	152	0.266373782331701	375896.113261064	4886649.47239384	5262545.5856549
TCGA-02-0258-01A	7	174	0.50196273304112	268497.223757903	4725551.13813909	4994048.361897
TCGA-02-0260-01A	4	98	-0.384300462484789	214797.779006322	3168267.24034326	3383065.01934958
TCGA-02-0266-01A	11	415	3.25050049131767	536994.447515806	11330582.8425835	11867577.2900993
TCGA-02-0269-01B	5	260	1.4443185358788	268497.223757903	9826998.38953925	10095495.6132972
TCGA-02-0271-01A	7	58	-0.79938575659186	268497.223757903	1718382.23205058	1986879.45580848
TCGA-02-0281-01A	10	261	1.51162966465292	536994.447515806	7840118.93373077	8377113.38124658
TCGA-02-0285-01A	4	474	3.83386360736004	214797.779006322	16593128.4282384	16807926.2072447
TCGA-02-0289-01A	1	917	8.77001305079549	53699.4447515806	30071689.0608851	30125388.5056367
TCGA-02-0290-01A	4	379	2.76810406843648	214797.779006322	13585959.5221499	13800757.3011562
TCGA-02-0317-01A	5	230	1.1077628920082	161098.334254742	7571621.70997287	7732720.04422761
TCGA-02-0321-01A	3	174	0.457088647191707	161098.334254742	5638441.69891596	5799540.03317071
TCGA-02-0324-01A	6	122	-0.0926189044636036	322196.668509484	4510753.35913277	4832950.02764225
TCGA-02-0325-01A	10	136	0.109314481858755	536994.447515806	4457053.91438119	4994048.361897
TCGA-02-0326-01A	2	47	-0.978882099989513	107398.889503161	1503584.45304426	1610983.34254742
TCGA-02-0330-01A	10	117	-0.103837425925957	536994.447515806	4242256.13537487	4779250.58289067
TCGA-02-0332-01A	8	81	-0.530141241495382	429595.558012645	2416475.01382113	2846070.57183377
TCGA-02-0333-01A	7	168	0.434651604267001	214797.779006322	4403354.46962961	4618152.24863593
TCGA-02-0337-01A	6	86	-0.496485677108322	322196.668509484	3060868.35084009	3383065.01934958
TCGA-02-0338-01A	1	225	1.00679619884702	53699.4447515806	9236304.49727187	9290003.94202345
TCGA-02-0339-01A	6	66	-0.720856106355387	322196.668509484	2040578.90056006	2362775.56906955
TCGA-02-0422-01A	4	124	-0.0926189044636036	214797.779006322	4188556.69062329	4403354.46962961
TCGA-02-0430-01A	5	83	-0.541359762957735	268497.223757903	2523873.90332429	2792371.12708219
TCGA-02-0432-01A	6	68	-0.698419063430681	268497.223757903	2309076.12431797	2577573.34807587
TCGA-02-0439-01A	0	187	0.56927386181524	0	5638441.69891596	5638441.69891596
TCGA-02-0440-01A	3	132	-0.0140892542271306	161098.334254742	4295955.58012645	4457053.91438119
TCGA-02-0446-01A	4	130	-0.0253077756894839	214797.779006322	4403354.46962961	4618152.24863593
TCGA-02-0451-01A	3	191	0.647803512051713	161098.334254742	5853239.47792229	6014337.81217703
TCGA-02-0456-01A	7	74	-0.619889413194208	375896.113261064	2309076.12431797	2684972.23757903
TCGA-02-2466-01A	13	157	0.378558996955234	590693.892267387	4242256.13537487	4886649.47239384
TCGA-02-2470-01A	4	59	-0.821822799516567	214797.779006322	1986879.45580848	2201677.2348148
TCGA-02-2483-01A	5	194	0.703896119363479	214797.779006322	4886649.47239384	5101447.25140016
TCGA-02-2485-01A	7	129	-0.00287073276477735	375896.113261064	3866360.0221138	4242256.13537487
TCGA-02-2486-01A	8	118	-0.11505594738831	429595.558012645	4779250.58289067	5208846.14090332
TCGA-04-1331-01A	6	209	-0.855059783116816	322196.668509484	4940348.91714542	5262545.5856549
TCGA-04-1332-01A	11	263	-0.651762419145118	590693.892267387	7088326.70720864	7679020.59947603
TCGA-04-1335-01A	20	138	-1.05146571102168	751792.226522129	3114567.79559168	3866360.0221138
TCGA-04-1336-01A	20	283	-0.551836596175979	1073988.89503161	5853239.47792229	6927228.3729539
TCGA-04-1337-01A	19	107	-1.16172868809107	966590.005528451	3329365.574598	4295955.58012645
TCGA-04-1338-01A	10	501	0.164872754775089	483295.002764226	11437981.7320867	11921276.7348509
TCGA-04-1341-01A	18	468	0.0787298039396241	859191.11602529	10310293.3923035	11169484.5083288
TCGA-04-1342-01A	12	243	-0.717231061780072	644393.337018967	6282835.03593493	6927228.3729539
TCGA-04-1343-01A	19	211	-0.803374012615537	966590.005528451	4564452.80388435	5531042.8094128
TCGA-04-1346-01A	20	246	-0.679328163412467	859191.11602529	6766130.03869916	7625321.15472445
TCGA-04-1347-01A	15	571	0.423301607281484	698092.781770548	12673068.961373	13371161.7431436
TCGA-04-1348-01A	0	778	1.08487946969785	0	18580007.8840469	18633707.3287985
TCGA-04-1349-01A	25	268	-0.586293776510165	1127688.33978319	6068037.25692861	7195725.5967118
TCGA-04-1350-01A	26	147	-0.999779940520397	1342486.11878952	3705261.68785906	5047747.80664858
TCGA-04-1351-01A	23	454	0.0477183416388567	912890.56077687	9719599.50003609	10632490.060813
TCGA-04-1353-01A	4	628	0.581804636818739	214797.779006322	20029892.8923396	20244690.6713459
TCGA-04-1356-01A	11	581	0.443975915481995	590693.892267387	12673068.961373	13263762.8536404
TCGA-04-1357-01A	11	192	-0.896408399517839	590693.892267387	4081157.80112013	4671851.69338751
TCGA-04-1360-01A	18	418	-0.0935560977313057	698092.781770548	7732720.04422761	8430812.82599816
TCGA-04-1361-01A	14	362	-0.300299179736422	644393.337018967	7088326.70720864	7732720.04422761
TCGA-04-1362-01A	14	546	0.3337129384126	698092.781770548	10417692.2818066	11115785.0635772
TCGA-04-1364-01A	19	715	0.933267876227436	805491.671273709	13800757.3011562	14659948.4171815
TCGA-04-1365-01A	13	423	-0.0935560977313057	644393.337018967	9719599.50003609	10363992.8370551
TCGA-04-1367-01A	32	252	-0.617305238810932	1557283.89779584	5799540.03317071	7356823.93096654
TCGA-04-1369-01A	0	2244	6.13630210668952	0	84522926.0389879	84522926.0389879
TCGA-04-1371-01A	15	670	0.764427692589925	751792.226522129	14069254.5249141	14821046.7514362
TCGA-04-1514-01A	18	267	-0.613859520777514	859191.11602529	6819829.48345074	7679020.59947603
TCGA-04-1516-01A	10	451	-0.00741314689584081	483295.002764226	10954686.7293224	11437981.7320867
TCGA-04-1517-01A	17	533	0.299255758078414	805491.671273709	13693358.4116531	14498850.0829268
TCGA-04-1519-01A	32	232	-0.686219599479304	1664682.787299	4779250.58289067	6443933.37018967
TCGA-04-1525-01A	15	351	-0.334756360070607	698092.781770548	9773298.94478767	10471391.7265582
TCGA-04-1530-01A	6	230	-0.782699704415025	322196.668509484	5960638.36742545	6282835.03593493
TCGA-04-1536-01A	13	451	0.00292400720441498	590693.892267387	11760178.4005962	12350872.2928635
TCGA-04-1542-01A	22	388	-0.183144766600189	1020289.45028003	8645610.60500448	9665900.05528451
TCGA-04-1638-01A	23	169	-0.934311297885443	1235087.22928635	4242256.13537487	5477343.36466122
TCGA-04-1644-01B	18	320	-0.431236465006328	912890.56077687	8967807.27351396	9880697.83429083
TCGA-04-1646-01A	27	361	-0.258950563335398	1396185.5635411	8001217.26798551	9397402.83152661
TCGA-04-1648-01A	28	225	-0.724122497846909	1503584.45304426	5638441.69891596	7142026.15196022
TCGA-04-1649-01A	14	499	0.171764190841926	751792.226522129	12941566.1851309	13693358.4116531
TCGA-04-1651-01A	21	358	-0.289962025636166	1020289.45028003	7303124.48621496	8323413.93649499
TCGA-04-1652-01A	18	394	-0.176253330533352	751792.226522129	9826998.38953925	10578790.6160614
TCGA-04-1654-01A	9	365	-0.307190615803259	375896.113261064	8216015.04699183	8591911.1602529
TCGA-04-1655-01A	22	397	-0.152133304299422	912890.56077687	8430812.82599816	9343703.38677503
TCGA-05-4244-01A	18	128	-0.151055189347381	751792.226522129	3705261.68785906	4457053.91438119
TCGA-05-4249-01A	8	77	-0.607553064800813	375896.113261064	2147977.79006322	2523873.90332429
TCGA-05-4250-01A	12	124	-0.225890906634829	644393.337018967	3490463.90885274	4134857.24587171
TCGA-05-4382-01A	2	191	0.200672681903625	107398.889503161	5745840.58841913	5853239.47792229
TCGA-05-4384-01A	3	39	-0.929346649136839	161098.334254742	1503584.45304426	1664682.787299
TCGA-05-4389-01A	14	205	0.395245546850989	751792.226522129	6336534.48068651	7088326.70720864
TCGA-05-4390-01A	9	238	0.604785555255844	375896.113261064	7034627.26245706	7410523.37571812
TCGA-05-4395-01A	22	232	0.657170557357057	1073988.89503161	6068037.25692861	7142026.15196022
TCGA-05-4396-01A	9	357	1.49533059097647	483295.002764226	10363992.8370551	10847287.8398193
TCGA-05-4397-01A	6	188	0.208156253632369	322196.668509484	4832950.02764225	5208846.14090332
TCGA-05-4398-01A	8	259	0.754456989830739	375896.113261064	7732720.04422761	8108616.15748867
TCGA-05-4402-01A	8	165	0.0510012473287287	429595.558012645	3920059.46686538	4349655.02487803
TCGA-05-4403-01A	1	33	-0.989215222966798	53699.4447515806	1235087.22928635	1288786.67403793
TCGA-05-4405-01A	15	94	-0.427947343310938	698092.781770548	3060868.35084009	3758961.13261064
TCGA-05-4410-01A	13	111	-0.315693767379766	698092.781770548	3329365.574598	4081157.80112013
TCGA-05-4415-01A	8	198	0.297959114377307	375896.113261064	5638441.69891596	6014337.81217703
TCGA-05-4417-01A	11	120	-0.263308765278553	590693.892267387	3221966.68509484	3812660.57736222
TCGA-05-4418-01A	4	84	-0.585102349614579	214797.779006322	2899770.01658535	3114567.79559168
TCGA-05-4420-01A	13	270	0.874194137490656	698092.781770548	7571621.70997287	8269714.49174341
TCGA-05-4422-01A	8	244	0.642203413899567	429595.558012645	5960638.36742545	6390233.92543809
TCGA-05-4424-01A	9	135	-0.16602233280487	483295.002764226	3490463.90885274	3973758.91161696
TCGA-05-4425-01A	8	68	-0.674905210359516	429595.558012645	1825781.12155374	2255376.67956639
TCGA-05-4426-01A	4	198	0.268024827462328	107398.889503161	4994048.361897	5101447.25140016
TCGA-05-4427-01A	11	345	1.42049487368903	590693.892267387	10739888.9503161	11330582.8425835
TCGA-05-4430-01A	4	107	-0.412980199853449	161098.334254742	3383065.01934958	3544163.35360432
TCGA-05-4432-01A	11	273	0.881677709219401	590693.892267387	7303124.48621496	7893818.37848235
TCGA-05-4433-01A	7	257	0.732006274644505	375896.113261064	9021506.71826554	9397402.83152661
TCGA-05-4434-01A	0	190	0.17822196671739	0	6497632.81494125	6551332.25969283
TCGA-05-5420-01A	1	72	-0.697355925545751	53699.4447515806	2470174.45857271	2523873.90332429
TCGA-05-5423-01A	16	91	-0.442914486768428	805491.671273709	2631272.79282745	3436764.46410116
TCGA-05-5425-01A	6	243	0.619752698713333	268497.223757903	6873528.92820232	7142026.15196022
TCGA-05-5428-01A	17	237	0.657170557357057	805491.671273709	5316245.03040648	6121736.70168019
TCGA-05-5429-01A	8	268	0.821809135389443	429595.558012645	8967807.27351396	9397402.83152661
TCGA-05-5715-01A	7	254	0.709555559458271	375896.113261064	6712430.59394758	7088326.70720864
TCGA-06-0119-01A	0	22	-1.28178217947305	0	859191.11602529	859191.11602529
TCGA-06-0122-01A	5	136	0.0532218745469891	268497.223757903	3597862.7983559	3866360.0221138
TCGA-06-0124-01A	5	114	-0.193585597624783	268497.223757903	3973758.91161696	4242256.13537487
TCGA-06-0125-01A	6	101	-0.328207855173023	322196.668509484	3597862.7983559	3920059.46686538
TCGA-06-0126-01A	6	74	-0.631107934656561	322196.668509484	2255376.67956639	2577573.34807587
TCGA-06-0127-01A	5	97	-0.384300462484789	268497.223757903	2953469.46133693	3221966.68509484
TCGA-06-0128-01A	7	74	-0.619889413194208	375896.113261064	2846070.57183377	3221966.68509484
TCGA-06-0129-01A	2	462	3.6768043068871	107398.889503161	18848505.1078048	19009603.4420595
TCGA-06-0130-01A	9	67	-0.675982020505974	483295.002764226	2470174.45857271	2953469.46133693
TCGA-06-0132-01A	2	49	-0.956445057064806	107398.889503161	1772081.67680216	1879480.56630532
TCGA-06-0133-01A	7	117	-0.137492990313017	375896.113261064	3383065.01934958	3758961.13261064
TCGA-06-0137-01A	5	71	-0.675982020505974	268497.223757903	2147977.79006322	2416475.01382113
TCGA-06-0138-01A	8	142	0.154188567708169	322196.668509484	4188556.69062329	4510753.35913277
TCGA-06-0139-01A	0	45	-1.02375618583893	0	1933180.0110569	1933180.0110569
TCGA-06-0139-01B	0	54	-0.922789492677746	0	1933180.0110569	1933180.0110569
TCGA-06-0140-01A	6	85	-0.507704198570675	322196.668509484	2523873.90332429	2846070.57183377
TCGA-06-0141-01A	0	115	-0.238459683474196	0	4940348.91714542	4994048.361897
TCGA-06-0142-01A	0	64	-0.810604278054214	0	2147977.79006322	2147977.79006322
TCGA-06-0143-01A	5	123	-0.0926189044636036	268497.223757903	4027458.35636855	4295955.58012645
TCGA-06-0145-01A	5	102	-0.328207855173023	268497.223757903	3651562.24310748	3920059.46686538
TCGA-06-0146-01A	1	245	1.23116662809408	53699.4447515806	9719599.50003609	9773298.94478767
TCGA-06-0147-01A	1	50	-0.956445057064806	53699.4447515806	1879480.56630532	1933180.0110569
TCGA-06-0148-01A	6	147	0.187844132095228	322196.668509484	4349655.02487803	4671851.69338751
TCGA-06-0149-01A	6	47	-0.9340080141401	268497.223757903	1557283.89779584	1825781.12155374
TCGA-06-0150-01A	5	92	-0.440393069796555	268497.223757903	2470174.45857271	2738671.68233061
TCGA-06-0151-01A	18	90	-0.316989333710669	859191.11602529	2470174.45857271	3329365.574598
TCGA-06-0152-01A	8	110	-0.204804119087136	429595.558012645	3812660.57736222	4242256.13537487
TCGA-06-0154-01A	4	200	0.759988726675246	214797.779006322	6551332.25969283	6766130.03869916
TCGA-06-0155-01B	4	81	-0.575015327344795	214797.779006322	2470174.45857271	2684972.23757903
TCGA-06-0157-01A	7	103	-0.294552290785963	375896.113261064	2846070.57183377	3221966.68509484
TCGA-06-0158-01A	8	108	-0.227241162011843	375896.113261064	2416475.01382113	2792371.12708219
TCGA-06-0159-01A	5	51	-0.90035244975304	268497.223757903	1718382.23205058	1986879.45580848
TCGA-06-0160-01A	0	45	-1.02375618583893	0	1342486.11878952	1342486.11878952
TCGA-06-0162-01A	11	328	2.27448912409294	483295.002764226	8914107.82876238	9397402.83152661
TCGA-06-0164-01A	7	87	-0.474048634183615	375896.113261064	2738671.68233061	3114567.79559168
TCGA-06-0165-01A	0	46	-1.01253766437657	0	1664682.787299	1664682.787299
TCGA-06-0166-01A	9	223	1.07410732762114	483295.002764226	7732720.04422761	8216015.04699183
TCGA-06-0168-01A	7	75	-0.608670891731855	375896.113261064	2362775.56906955	2738671.68233061
TCGA-06-0169-01A	4	71	-0.687200541968328	214797.779006322	2416475.01382113	2631272.79282745
TCGA-06-0171-01A	9	95	-0.361863419560082	483295.002764226	3060868.35084009	3544163.35360432
TCGA-06-0173-01A	11	146	0.232718217944642	375896.113261064	3705261.68785906	4081157.80112013
TCGA-06-0174-01A	7	136	0.0756589174716956	214797.779006322	3114567.79559168	3329365.574598
TCGA-06-0175-01A	7	136	0.0756589174716956	375896.113261064	4242256.13537487	4618152.24863593
TCGA-06-0176-01A	3	80	-0.597452370269501	161098.334254742	2631272.79282745	2792371.12708219
TCGA-06-0177-01A	15	209	0.984359155922311	805491.671273709	6175436.14643177	6980927.81770548
TCGA-06-0178-01A	0	16	-1.34909330824717	0	483295.002764226	483295.002764226
TCGA-06-0179-01A	5	79	-0.586233848807148	268497.223757903	2631272.79282745	2899770.01658535
TCGA-06-0182-01A	6	165	0.389777518417588	322196.668509484	4457053.91438119	4779250.58289067
TCGA-06-0184-01A	10	166	0.445870125729354	536994.447515806	4081157.80112013	4618152.24863593
TCGA-06-0185-01A	13	106	-0.193585597624783	483295.002764226	2738671.68233061	3221966.68509484
TCGA-06-0187-01A	7	119	-0.11505594738831	268497.223757903	2738671.68233061	3060868.35084009
TCGA-06-0188-01A	14	142	0.221499696482288	751792.226522129	3651562.24310748	4403354.46962961
TCGA-06-0189-01A	0	76	-0.675982020505974	0	3275666.12984642	3275666.12984642
TCGA-06-0190-01A	6	107	-0.260896726398903	322196.668509484	3490463.90885274	3812660.57736222
TCGA-06-0192-01B	8	95	-0.373081941022436	429595.558012645	3060868.35084009	3490463.90885274
TCGA-06-0194-01A	5	42	-1.00131914291422	268497.223757903	1503584.45304426	1772081.67680216
TCGA-06-0195-01B	18	80	-0.429174548334202	912890.56077687	2147977.79006322	3060868.35084009
TCGA-06-0197-01A	8	51	-0.86669688536598	322196.668509484	1718382.23205058	2040578.90056006
TCGA-06-0201-01A	5	48	-0.9340080141401	268497.223757903	1449885.00829268	1718382.23205058
TCGA-06-0206-01A	6	56	-0.83304132097892	268497.223757903	1610983.34254742	1879480.56630532
TCGA-06-0208-01B	3	108	-0.283333769323609	161098.334254742	2362775.56906955	2523873.90332429
TCGA-06-0209-01A	15	118	-0.0365262971518372	805491.671273709	2953469.46133693	3758961.13261064
TCGA-06-0210-01A	3	129	-0.0477448186141905	161098.334254742	3812660.57736222	3973758.91161696
TCGA-06-0210-01B	5	83	-0.541359762957735	268497.223757903	2953469.46133693	3221966.68509484
TCGA-06-0211-01A	8	105	-0.260896726398903	429595.558012645	2792371.12708219	3221966.68509484
TCGA-06-0211-01B	8	111	-0.193585597624783	429595.558012645	3060868.35084009	3490463.90885274
TCGA-06-0213-01A	7	85	-0.496485677108322	322196.668509484	2899770.01658535	3221966.68509484
TCGA-06-0214-01A	5	152	0.232718217944642	268497.223757903	4725551.13813909	4994048.361897
TCGA-06-0216-01A	0	21	-1.2930007009354	0	644393.337018967	644393.337018967
TCGA-06-0216-01B	20	96	-0.227241162011843	966590.005528451	2470174.45857271	3436764.46410116
TCGA-06-0219-01A	4	117	-0.171148554700077	214797.779006322	3866360.0221138	4081157.80112013
TCGA-06-0221-01A	7	198	0.771207248137599	322196.668509484	4510753.35913277	4832950.02764225
TCGA-06-0237-01A	12	110	-0.159930033237723	536994.447515806	3007168.90608851	3544163.35360432
TCGA-06-0238-01A	3	145	0.131751524783462	161098.334254742	4725551.13813909	4886649.47239384
TCGA-06-0240-01A	0	56	-0.90035244975304	0	2147977.79006322	2147977.79006322
TCGA-06-0241-01A	5	171	0.445870125729354	214797.779006322	4940348.91714542	5155146.69615174
TCGA-06-0394-01A	7	64	-0.732074627817741	375896.113261064	2416475.01382113	2792371.12708219
TCGA-06-0397-01A	7	80	-0.552578284420088	375896.113261064	2470174.45857271	2846070.57183377
TCGA-06-0402-01A	6	381	2.8129781542859	268497.223757903	11599080.0663414	11867577.2900993
TCGA-06-0409-01A	9	235	1.20872958516938	483295.002764226	7571621.70997287	8054916.71273709
TCGA-06-0410-01A	13	198	0.838518376911719	698092.781770548	5692141.14366754	6390233.92543809
TCGA-06-0412-01A	7	136	0.0756589174716956	268497.223757903	3705261.68785906	3973758.91161696
TCGA-06-0413-01A	3	84	-0.552578284420088	161098.334254742	2792371.12708219	2953469.46133693
TCGA-06-0414-01A	15	122	0.00834778869757593	805491.671273709	3168267.24034326	3973758.91161696
TCGA-06-0644-01A	4	65	-0.754511670742447	161098.334254742	2040578.90056006	2201677.2348148
TCGA-06-0645-01A	8	100	-0.316989333710669	375896.113261064	3221966.68509484	3597862.7983559
TCGA-06-0646-01A	5	71	-0.675982020505974	268497.223757903	2362775.56906955	2631272.79282745
TCGA-06-0648-01A	5	124	-0.0814003830012503	268497.223757903	4403354.46962961	4671851.69338751
TCGA-06-0649-01B	5	168	0.412214561342294	268497.223757903	5101447.25140016	5369944.47515806
TCGA-06-0650-01A	0	33	-1.15837844338717	0	1073988.89503161	1073988.89503161
TCGA-06-0686-01A	9	89	-0.429174548334202	375896.113261064	2470174.45857271	2846070.57183377
TCGA-06-0743-01A	6	122	-0.0926189044636036	322196.668509484	3705261.68785906	4027458.35636855
TCGA-06-0744-01A	6	174	0.490744211578767	322196.668509484	6014337.81217703	6336534.48068651
TCGA-06-0745-01A	5	128	-0.0365262971518372	268497.223757903	3973758.91161696	4242256.13537487
TCGA-06-0747-01A	7	74	-0.619889413194208	375896.113261064	2309076.12431797	2684972.23757903
TCGA-06-0749-01A	6	91	-0.440393069796555	322196.668509484	3114567.79559168	3436764.46410116
TCGA-06-0750-01A	4	112	-0.227241162011843	214797.779006322	3597862.7983559	3812660.57736222
TCGA-06-0875-01A	8	132	0.0420033530846358	375896.113261064	3114567.79559168	3490463.90885274
TCGA-06-0876-01A	5	105	-0.294552290785963	214797.779006322	3383065.01934958	3597862.7983559
TCGA-06-0877-01A	8	93	-0.395518983947142	429595.558012645	2953469.46133693	3383065.01934958
TCGA-06-0878-01A	6	103	-0.305770812248316	322196.668509484	3544163.35360432	3866360.0221138
TCGA-06-0879-01A	8	65	-0.709637584893034	429595.558012645	1986879.45580848	2416475.01382113
TCGA-06-0881-01A	0	70	-0.743293149280094	0	2792371.12708219	2792371.12708219
TCGA-06-0882-01A	4	122	-0.11505594738831	214797.779006322	3973758.91161696	4188556.69062329
TCGA-06-0939-01A	6	52	-0.877915406828333	322196.668509484	2040578.90056006	2362775.56906955
TCGA-06-1084-01A	8	183	0.614147947664653	429595.558012645	6121736.70168019	6551332.25969283
TCGA-06-1086-01A	16	115	-0.0589633400765438	805491.671273709	3329365.574598	4134857.24587171
TCGA-06-1087-01A	13	327	2.28570764555529	698092.781770548	9880697.83429083	10578790.6160614
TCGA-06-1800-01A	7	67	-0.698419063430681	375896.113261064	2201677.2348148	2577573.34807587
TCGA-06-1801-01A	3	91	-0.474048634183615	161098.334254742	3114567.79559168	3275666.12984642
TCGA-06-1802-01A	5	366	2.63348181088824	268497.223757903	13371161.7431436	13639658.9669015
TCGA-06-1804-01A	6	170	0.445870125729354	214797.779006322	5960638.36742545	6229135.59118335
TCGA-06-1805-01A	4	111	-0.238459683474196	214797.779006322	3597862.7983559	3812660.57736222
TCGA-06-1806-01A	5	130	-0.0140892542271306	268497.223757903	4242256.13537487	4510753.35913277
TCGA-06-2557-01A	8	223	1.06288880615878	429595.558012645	6766130.03869916	7195725.5967118
TCGA-06-2558-01A	9	115	-0.137492990313017	429595.558012645	3866360.0221138	4295955.58012645
TCGA-06-2559-01A	5	134	0.0307848316222825	268497.223757903	4349655.02487803	4618152.24863593
TCGA-06-2561-01A	11	168	0.479525690116414	590693.892267387	4618152.24863593	5208846.14090332
TCGA-06-2562-01A	7	190	0.681459076438773	375896.113261064	7303124.48621496	7679020.59947603
TCGA-06-2563-01A	6	122	-0.0926189044636036	322196.668509484	3544163.35360432	3866360.0221138
TCGA-06-2564-01A	3	136	0.0307848316222825	107398.889503161	3221966.68509484	3329365.574598
TCGA-06-2565-01A	3	146	0.142970046245815	161098.334254742	4779250.58289067	4940348.91714542
TCGA-06-2566-01A	1	89	-0.518922720033028	53699.4447515806	3329365.574598	3383065.01934958
TCGA-06-2567-01A	7	46	-0.9340080141401	375896.113261064	1825781.12155374	2201677.2348148
TCGA-06-2569-01A	16	353	2.61104476796354	805491.671273709	5369944.47515806	6175436.14643177
TCGA-06-2570-01A	3	87	-0.518922720033028	161098.334254742	2255376.67956639	2416475.01382113
TCGA-06-5408-01A	9	78	-0.552578284420088	483295.002764226	2309076.12431797	2792371.12708219
TCGA-06-5410-01A	0	34	-1.14715992192481	0	1503584.45304426	1503584.45304426
TCGA-06-5411-01A	4	38	-1.05741175022599	214797.779006322	1396185.5635411	1610983.34254742
TCGA-06-5412-01A	2	42	-1.03497470730128	107398.889503161	1772081.67680216	1879480.56630532
TCGA-06-5413-01A	6	83	-0.530141241495382	322196.668509484	3221966.68509484	3544163.35360432
TCGA-06-5414-01A	7	75	-0.608670891731855	375896.113261064	2899770.01658535	3275666.12984642
TCGA-06-5415-01A	9	145	0.199062653557582	483295.002764226	4403354.46962961	4886649.47239384
TCGA-06-5416-01A	5	104	-0.305770812248316	268497.223757903	3920059.46686538	4188556.69062329
TCGA-06-5418-01A	5	148	0.187844132095228	214797.779006322	4779250.58289067	4994048.361897
TCGA-06-5856-01A	18	315	2.20717799531882	859191.11602529	8699310.04975606	9558501.16578135
TCGA-06-5858-01A	6	86	-0.496485677108322	161098.334254742	3597862.7983559	3758961.13261064
TCGA-06-5859-01A	11	165	0.445870125729354	536994.447515806	4671851.69338751	5208846.14090332
TCGA-06-6388-01A	4	56	-0.855478363903627	214797.779006322	1772081.67680216	1986879.45580848
TCGA-06-6389-01A	6	114	-0.18236707616243	268497.223757903	3866360.0221138	4134857.24587171
TCGA-06-6390-01A	6	124	-0.070181861538897	322196.668509484	4457053.91438119	4779250.58289067
TCGA-06-6391-01A	1	183	0.53561829742818	53699.4447515806	7410523.37571812	7464222.82046971
TCGA-06-6693-01A	6	91	-0.440393069796555	322196.668509484	2631272.79282745	2953469.46133693
TCGA-06-6694-01A	12	110	-0.159930033237723	536994.447515806	2953469.46133693	3490463.90885274
TCGA-06-6695-01A	8	116	-0.137492990313017	429595.558012645	3490463.90885274	3920059.46686538
TCGA-06-6697-01A	7	64	-0.732074627817741	375896.113261064	2040578.90056006	2416475.01382113
TCGA-06-6698-01A	5	38	-1.04619322876363	268497.223757903	1396185.5635411	1664682.787299
TCGA-06-6699-01A	6	107	-0.260896726398903	322196.668509484	3920059.46686538	4242256.13537487
TCGA-06-6700-01A	2	90	-0.496485677108322	107398.889503161	2899770.01658535	3007168.90608851
TCGA-06-6701-01A	2	55	-0.889133928290687	107398.889503161	2201677.2348148	2309076.12431797
TCGA-06-A5U0-01A	6	76	-0.608670891731855	322196.668509484	1825781.12155374	2147977.79006322
TCGA-06-A5U1-01A	10	139	0.142970046245815	536994.447515806	4242256.13537487	4779250.58289067
TCGA-06-A6S0-01A	6	119	-0.126274468850663	322196.668509484	3866360.0221138	4188556.69062329
TCGA-06-A6S1-01A	8	113	-0.171148554700077	429595.558012645	3329365.574598	3758961.13261064
TCGA-06-A7TK-01A	5	78	-0.597452370269501	268497.223757903	2362775.56906955	2631272.79282745
TCGA-06-A7TL-01A	8	193	0.726333162288186	268497.223757903	5477343.36466122	5745840.58841913
TCGA-08-0244-01A	4	56	-0.855478363903627	214797.779006322	1664682.787299	1879480.56630532
TCGA-08-0245-01A	23	187	0.827299855449365	1127688.33978319	4671851.69338751	5799540.03317071
TCGA-08-0246-01A	16	81	-0.440393069796555	859191.11602529	1718382.23205058	2577573.34807587
TCGA-08-0344-01A	2	26	-1.21447105069893	107398.889503161	751792.226522129	859191.11602529
TCGA-08-0345-01A	3	70	-0.709637584893034	161098.334254742	2362775.56906955	2523873.90332429
TCGA-08-0346-01A	4	70	-0.698419063430681	214797.779006322	2738671.68233061	2953469.46133693
TCGA-08-0347-01A	4	73	-0.664763499043621	214797.779006322	2899770.01658535	3114567.79559168
TCGA-08-0348-01A	3	55	-0.877915406828333	161098.334254742	1288786.67403793	1449885.00829268
TCGA-08-0349-01A	9	84	-0.485267155645968	483295.002764226	2523873.90332429	3007168.90608851
TCGA-08-0350-01A	7	111	-0.204804119087136	322196.668509484	3758961.13261064	4081157.80112013
TCGA-08-0351-01A	3	64	-0.776948713667154	161098.334254742	2738671.68233061	2899770.01658535
TCGA-08-0352-01A	7	125	-0.0477448186141905	322196.668509484	3973758.91161696	4295955.58012645
TCGA-08-0353-01A	3	108	-0.283333769323609	161098.334254742	2846070.57183377	3007168.90608851
TCGA-08-0354-01A	7	92	-0.417956026871849	268497.223757903	3114567.79559168	3383065.01934958
TCGA-08-0355-01A	6	64	-0.743293149280094	214797.779006322	1825781.12155374	2040578.90056006
TCGA-08-0356-01A	5	115	-0.18236707616243	268497.223757903	3973758.91161696	4242256.13537487
TCGA-08-0357-01A	4	148	0.176625610632875	214797.779006322	5477343.36466122	5692141.14366754
TCGA-08-0358-01A	4	178	0.513181254503474	161098.334254742	3866360.0221138	4027458.35636855
TCGA-08-0359-01A	6	41	-1.00131914291422	322196.668509484	1610983.34254742	1933180.0110569
TCGA-08-0360-01A	7	185	0.625366469127006	375896.113261064	6229135.59118335	6605031.70444442
TCGA-08-0373-01A	5	85	-0.518922720033028	268497.223757903	2577573.34807587	2846070.57183377
TCGA-08-0375-01A	7	107	-0.24967820493655	375896.113261064	3383065.01934958	3758961.13261064
TCGA-08-0380-01A	4	32	-1.12472287900011	214797.779006322	805491.671273709	1020289.45028003
TCGA-08-0385-01A	2	330	2.19595947385647	107398.889503161	10578790.6160614	10686189.5055645
TCGA-08-0386-01A	16	109	-0.126274468850663	751792.226522129	3597862.7983559	4349655.02487803
TCGA-08-0389-01A	4	83	-0.552578284420088	214797.779006322	2362775.56906955	2577573.34807587
TCGA-08-0390-01A	6	119	-0.126274468850663	322196.668509484	4188556.69062329	4510753.35913277
TCGA-08-0392-01A	4	144	0.131751524783462	214797.779006322	5208846.14090332	5423643.91990964
TCGA-08-0509-01A	5	75	-0.631107934656561	268497.223757903	2577573.34807587	2846070.57183377
TCGA-08-0510-01A	7	295	1.85940382998587	322196.668509484	9665900.05528451	9988096.72379399
TCGA-08-0511-01A	3	131	-0.0253077756894839	161098.334254742	4134857.24587171	4349655.02487803
TCGA-08-0512-01A	6	96	-0.384300462484789	322196.668509484	3436764.46410116	3758961.13261064
TCGA-08-0514-01A	8	111	-0.193585597624783	429595.558012645	3866360.0221138	4295955.58012645
TCGA-08-0516-01A	16	71	-0.552578284420088	805491.671273709	2094278.34531164	2899770.01658535
TCGA-08-0517-01A	9	286	1.78087417974939	375896.113261064	8269714.49174341	8699310.04975606
TCGA-08-0518-01A	4	261	1.4443185358788	214797.779006322	8430812.82599816	8645610.60500448
TCGA-08-0520-01A	8	130	0.0195663101599292	375896.113261064	4027458.35636855	4403354.46962961
TCGA-08-0521-01A	1	68	-0.754511670742447	53699.4447515806	2255376.67956639	2309076.12431797
TCGA-08-0522-01A	8	59	-0.776948713667154	429595.558012645	1718382.23205058	2147977.79006322
TCGA-08-0524-01A	6	64	-0.743293149280094	268497.223757903	1986879.45580848	2255376.67956639
TCGA-08-0525-01A	10	135	0.0980959603964022	483295.002764226	4027458.35636855	4510753.35913277
TCGA-08-0529-01A	6	132	0.0195663101599292	268497.223757903	3597862.7983559	3866360.0221138
TCGA-08-0531-01A	4	159	0.300029346718761	214797.779006322	5155146.69615174	5369944.47515806
TCGA-09-0364-01A	14	392	-0.196927638733864	698092.781770548	9988096.72379399	10686189.5055645
TCGA-09-0365-01A	25	209	-0.789591140481862	1181387.78453477	5262545.5856549	6443933.37018967
TCGA-09-0366-01A	16	268	-0.617305238810932	805491.671273709	7625321.15472445	8430812.82599816
TCGA-09-0367-01A	7	531	0.257907141677391	268497.223757903	13156363.9641373	13424861.1878952
TCGA-09-0369-01A	20	394	-0.169361894466515	966590.005528451	9934397.27904241	10900987.2845709
TCGA-09-1659-01B	14	455	0.020152597371508	698092.781770548	12458271.1823667	13156363.9641373
TCGA-09-1661-01B	27	373	-0.217601946934375	1181387.78453477	9988096.72379399	11169484.5083288
TCGA-09-1662-01A	9	295	-0.54839087814256	483295.002764226	7625321.15472445	8108616.15748867
TCGA-09-1664-01A	4	69	-1.34435174386226	214797.779006322	2094278.34531164	2309076.12431797
TCGA-09-1665-01B	3	914	1.56383427634304	161098.334254742	21748275.1243901	21909373.4586449
TCGA-09-1666-01A	20	431	-0.0418703272300268	1020289.45028003	9988096.72379399	11008386.174074
TCGA-09-1667-01C	7	596	0.4818788138496	375896.113261064	16056133.9807226	16432030.0939837
TCGA-09-1668-01B	21	206	-0.813711166715792	1073988.89503161	4832950.02764225	5906938.92267387
TCGA-09-1669-01A	11	328	-0.42779074697291	429595.558012645	7356823.93096654	7786419.48897919
TCGA-09-1670-01A	25	186	-0.86884265525049	1342486.11878952	4671851.69338751	6014337.81217703
TCGA-09-1672-01A	20	67	-1.2961116913944	1073988.89503161	1718382.23205058	2792371.12708219
TCGA-09-1673-01A	2	1373	3.14197313564876	107398.889503161	38234004.6631254	38341403.5526286
TCGA-09-1674-01A	14	451	0.00636972523783358	590693.892267387	9397402.83152661	9988096.72379399
TCGA-09-1675-01B	21	402	-0.138350432165747	1073988.89503161	8860408.3840108	9934397.27904241
TCGA-09-2043-01A	11	539	0.299255758078414	429595.558012645	12350872.2928635	12780467.8508762
TCGA-09-2044-01B	16	632	0.636936125353437	644393.337018967	15841336.2017163	16485729.5387352
TCGA-09-2045-01A	7	241	-0.741351088014002	268497.223757903	6497632.81494125	6766130.03869916
TCGA-09-2048-01A	5	248	-0.724122497846909	268497.223757903	4618152.24863593	4886649.47239384
TCGA-09-2049-01D	14	405	-0.152133304299422	698092.781770548	7303124.48621496	8001217.26798551
TCGA-09-2050-01A	23	422	-0.0625446354305384	1181387.78453477	8753009.49450764	9934397.27904241
TCGA-09-2051-01A	12	512	0.209667089209531	590693.892267387	12941566.1851309	13532260.0773983
TCGA-09-2053-01C	20	469	0.0890669580398799	1020289.45028003	11545380.6215898	12565670.0718699
TCGA-09-2054-01A	18	464	0.0649469318059497	751792.226522129	11008386.174074	11760178.4005962
TCGA-09-2055-01B	12	159	-1.00667137658723	590693.892267387	3920059.46686538	4510753.35913277
TCGA-09-2056-01B	27	345	-0.314082051870096	1342486.11878952	7034627.26245706	8377113.38124658
TCGA-10-0925-01B	11	143	-1.06524858315535	429595.558012645	3275666.12984642	3705261.68785906
TCGA-10-0926-01A	16	193	-0.875734091317327	805491.671273709	3973758.91161696	4779250.58289067
TCGA-10-0927-01A	26	255	-0.627642392911188	1073988.89503161	5369944.47515806	6443933.37018967
TCGA-10-0928-01A	20	563	0.412964453181228	1020289.45028003	11652779.511093	12673068.961373
TCGA-10-0930-01A	8	476	0.0718383678727869	322196.668509484	10471391.7265582	10793588.3950677
TCGA-10-0931-01A	13	258	-0.662099573245374	590693.892267387	5101447.25140016	5692141.14366754
TCGA-10-0933-01A	40	281	-0.489813671574444	1557283.89779584	5531042.8094128	7088326.70720864
TCGA-10-0934-01A	1	287	-0.603522366677258	53699.4447515806	7517922.26522129	7571621.70997287
TCGA-10-0935-01A	18	327	-0.407116438772398	644393.337018967	7142026.15196022	7786419.48897919
TCGA-10-0936-01A	21	449	0.0235983154049266	805491.671273709	12995265.6298825	13800757.3011562
TCGA-10-0937-01A	13	322	-0.441573619106584	590693.892267387	5423643.91990964	6014337.81217703
TCGA-10-0938-01A	23	392	-0.165916176433096	1073988.89503161	9558501.16578135	10632490.060813
TCGA-12-0615-01A	6	154	0.266373782331701	268497.223757903	3114567.79559168	3383065.01934958
TCGA-12-0616-01A	2	182	0.53561829742818	107398.889503161	6175436.14643177	6282835.03593493
TCGA-12-0618-01A	8	61	-0.754511670742447	322196.668509484	1933180.0110569	2255376.67956639
TCGA-12-0619-01A	12	230	1.18629254224467	644393.337018967	7249425.04146338	7893818.37848235
TCGA-12-0620-01A	5	69	-0.698419063430681	268497.223757903	2470174.45857271	2738671.68233061
TCGA-12-0653-01B	4	81	-0.575015327344795	214797.779006322	2792371.12708219	3007168.90608851
TCGA-12-0654-01B	8	50	-0.877915406828333	375896.113261064	1879480.56630532	2255376.67956639
TCGA-12-0656-01A	6	81	-0.552578284420088	322196.668509484	2792371.12708219	3114567.79559168
TCGA-12-0657-01A	4	82	-0.563796805882441	214797.779006322	2094278.34531164	2309076.12431797
TCGA-12-0662-01A	8	131	0.0307848316222825	375896.113261064	4457053.91438119	4832950.02764225
TCGA-12-0670-01B	6	191	0.681459076438773	322196.668509484	5584742.25416438	5906938.92267387
TCGA-12-0688-01A	6	61	-0.776948713667154	322196.668509484	2201677.2348148	2523873.90332429
TCGA-12-0691-01A	9	306	2.00524460899646	483295.002764226	7840118.93373077	8323413.93649499
TCGA-12-0692-01A	6	79	-0.575015327344795	322196.668509484	2094278.34531164	2416475.01382113
TCGA-12-0703-01A	4	66	-0.743293149280094	214797.779006322	2416475.01382113	2631272.79282745
TCGA-12-0707-01A	7	140	0.120533003321109	375896.113261064	4725551.13813909	5101447.25140016
TCGA-12-0769-01A	6	113	-0.193585597624783	322196.668509484	3597862.7983559	3920059.46686538
TCGA-12-0772-01A	6	121	-0.103837425925957	322196.668509484	3436764.46410116	3758961.13261064
TCGA-12-0773-01A	4	45	-0.978882099989513	161098.334254742	1396185.5635411	1557283.89779584
TCGA-12-0775-01A	3	147	0.154188567708169	161098.334254742	5208846.14090332	5369944.47515806
TCGA-12-0776-01A	9	202	0.838518376911719	483295.002764226	7410523.37571812	7893818.37848235
TCGA-12-0778-01A	7	161	0.356121954030528	375896.113261064	5369944.47515806	5745840.58841913
TCGA-12-0780-01A	6	111	-0.21602264054949	322196.668509484	3597862.7983559	3920059.46686538
TCGA-12-0818-01A	4	155	0.255155260869348	214797.779006322	5531042.8094128	5745840.58841913
TCGA-12-0819-01A	9	63	-0.720856106355387	483295.002764226	1772081.67680216	2255376.67956639
TCGA-12-0820-01A	6	129	-0.0140892542271306	322196.668509484	4081157.80112013	4403354.46962961
TCGA-12-0821-01A	5	110	-0.238459683474196	268497.223757903	3275666.12984642	3544163.35360432
TCGA-12-0822-01A	5	70	-0.687200541968328	268497.223757903	2470174.45857271	2738671.68233061
TCGA-12-0826-01A	11	86	-0.440393069796555	536994.447515806	2201677.2348148	2738671.68233061
TCGA-12-0827-01A	3	404	3.03734858353296	161098.334254742	16270931.7597289	16432030.0939837
TCGA-12-0828-01A	3	60	-0.821822799516567	161098.334254742	2040578.90056006	2201677.2348148
TCGA-12-0829-01A	7	133	0.0420033530846358	375896.113261064	4242256.13537487	4618152.24863593
TCGA-12-1088-01A	10	114	-0.137492990313017	536994.447515806	3329365.574598	3866360.0221138
TCGA-12-1089-01A	2	211	0.860955419836425	107398.889503161	8806708.93925922	8914107.82876238
TCGA-12-1090-01A	5	86	-0.507704198570675	161098.334254742	2201677.2348148	2362775.56906955
TCGA-12-1091-01A	10	163	0.412214561342294	483295.002764226	5638441.69891596	6121736.70168019
TCGA-12-1092-01B	10	78	-0.541359762957735	536994.447515806	2631272.79282745	3168267.24034326
TCGA-12-1093-01A	8	41	-0.978882099989513	429595.558012645	1449885.00829268	1879480.56630532
TCGA-12-1094-01A	6	99	-0.350644898097729	322196.668509484	3329365.574598	3651562.24310748
TCGA-12-1095-01A	4	66	-0.743293149280094	214797.779006322	2309076.12431797	2523873.90332429
TCGA-12-1096-01A	5	71	-0.675982020505974	268497.223757903	2416475.01382113	2684972.23757903
TCGA-12-1097-01B	6	79	-0.575015327344795	322196.668509484	2309076.12431797	2631272.79282745
TCGA-12-1098-01C	9	135	0.0868774389340489	429595.558012645	4725551.13813909	5155146.69615174
TCGA-12-1099-01A	13	434	3.48608944202709	536994.447515806	17881915.1022763	18418909.5497921
TCGA-12-1597-01B	6	1012	9.89186519703082	322196.668509484	29856891.2818788	30232787.3951399
TCGA-12-1598-01A	16	250	1.45553705734115	698092.781770548	5692141.14366754	6390233.92543809
TCGA-12-1599-01A	5	69	-0.698419063430681	268497.223757903	2147977.79006322	2416475.01382113
TCGA-12-1600-01A	9	101	-0.294552290785963	375896.113261064	2846070.57183377	3221966.68509484
TCGA-12-1602-01A	21	145	0.333684911105821	1020289.45028003	3275666.12984642	4295955.58012645
TCGA-12-3644-01A	9	83	-0.496485677108322	322196.668509484	2147977.79006322	2470174.45857271
TCGA-12-3646-01A	21	155	0.445870125729354	1020289.45028003	4134857.24587171	5155146.69615174
TCGA-12-3648-01A	12	161	0.412214561342294	322196.668509484	3973758.91161696	4295955.58012645
TCGA-12-3649-01A	5	201	0.782425769599952	161098.334254742	5262545.5856549	5423643.91990964
TCGA-12-3650-01A	8	150	0.243936739406995	268497.223757903	3329365.574598	3597862.7983559
TCGA-12-3651-01A	3	318	2.07255573777058	161098.334254742	9504801.72102977	9665900.05528451
TCGA-12-3652-01A	7	159	0.333684911105821	268497.223757903	4832950.02764225	5101447.25140016
TCGA-12-3653-01A	23	206	1.04045176323408	1020289.45028003	5155146.69615174	6175436.14643177
TCGA-12-5295-01A	9	74	-0.597452370269501	483295.002764226	2470174.45857271	2953469.46133693
TCGA-12-5299-01A	7	54	-0.844259842441274	268497.223757903	1396185.5635411	1664682.787299
TCGA-12-5301-01A	5	87	-0.496485677108322	268497.223757903	3383065.01934958	3651562.24310748
TCGA-13-0714-01A	4	295	-0.565619468309653	214797.779006322	6873528.92820232	7088326.70720864
TCGA-13-0717-01A	16	573	0.43363876138174	859191.11602529	14767347.3066847	15680237.8674615
TCGA-13-0720-01A	19	265	-0.617305238810932	912890.56077687	5047747.80664858	5960638.36742545
TCGA-13-0723-01A	17	389	-0.196927638733864	859191.11602529	9236304.49727187	10095495.6132972
TCGA-13-0724-01A	13	725	0.94705074836111	698092.781770548	18848505.1078048	19546597.8895753
TCGA-13-0725-01A	10	188	-0.913636989684932	483295.002764226	4510753.35913277	5047747.80664858
TCGA-13-0726-01A	11	168	-0.979105632319885	536994.447515806	3597862.7983559	4134857.24587171
TCGA-13-0727-01A	21	251	-0.658653855211956	805491.671273709	6121736.70168019	6927228.3729539
TCGA-13-0730-01A	21	362	-0.276179153502491	1073988.89503161	7356823.93096654	8430812.82599816
TCGA-13-0751-01A	17	572	0.43363876138174	698092.781770548	13854456.7459078	14552549.5276783
TCGA-13-0755-01A	14	241	-0.717231061780072	698092.781770548	4940348.91714542	5638441.69891596
TCGA-13-0757-01A	16	524	0.264798577744228	644393.337018967	12834167.2956278	13478560.6326467
TCGA-13-0758-01A	15	460	0.0408269055720195	805491.671273709	12028675.6243541	12834167.2956278
TCGA-13-0760-01A	4	1080	2.13926918792394	161098.334254742	29427295.7238662	29588394.0581209
TCGA-13-0761-01A	8	330	-0.431236465006328	322196.668509484	9021506.71826554	9343703.38677503
TCGA-13-0762-01A	18	348	-0.334756360070607	698092.781770548	9397402.83152661	10095495.6132972
TCGA-13-0764-01A	7	787	1.14001095823255	322196.668509484	21801974.5691417	22124171.2376512
TCGA-13-0765-01A	13	193	-0.886071245417583	698092.781770548	4940348.91714542	5638441.69891596
TCGA-13-0766-01A	7	364	-0.317527769903515	322196.668509484	10954686.7293224	11276883.3978319
TCGA-13-0768-01A	0	194	-0.927419861818606	0	5262545.5856549	5262545.5856549
TCGA-13-0791-01A	1	1137	2.32533796172855	53699.4447515806	35817529.6493043	35871229.0940558
TCGA-13-0792-01A	4	673	0.736861948322576	214797.779006322	15358041.1989521	15626538.42271
TCGA-13-0793-01A	23	254	-0.641425265044863	1127688.33978319	5638441.69891596	6766130.03869916
TCGA-13-0794-01A	9	703	0.857462079492227	429595.558012645	20352089.5608491	20781685.1188617
TCGA-13-0795-01A	13	248	-0.69655675357956	644393.337018967	6068037.25692861	6712430.59394758
TCGA-13-0797-01A	8	327	-0.441573619106584	322196.668509484	7249425.04146338	7571621.70997287
TCGA-13-0799-01A	11	266	-0.641425265044863	429595.558012645	7142026.15196022	7571621.70997287
TCGA-13-0800-01A	15	280	-0.579402340443328	698092.781770548	7142026.15196022	7840118.93373077
TCGA-13-0801-01A	18	578	0.45775878761567	859191.11602529	13800757.3011562	14659948.4171815
TCGA-13-0802-01A	15	527	0.271690013811066	698092.781770548	12458271.1823667	13156363.9641373
TCGA-13-0803-01A	5	637	0.616261817152925	268497.223757903	21479777.9006322	21748275.1243901
TCGA-13-0804-01A	29	240	-0.668991009312211	1235087.22928635	5477343.36466122	6712430.59394758
TCGA-13-0805-01A	27	189	-0.851614065083397	1342486.11878952	4725551.13813909	6068037.25692861
TCGA-13-0807-01B	11	591	0.478433095816181	536994.447515806	14445150.6381752	14982145.085691
TCGA-13-0883-01A	17	333	-0.389887848605305	698092.781770548	6712430.59394758	7410523.37571812
TCGA-13-0884-01B	18	261	-0.634533828978025	859191.11602529	6229135.59118335	7088326.70720864
TCGA-13-0885-01A	11	499	0.16142703674167	483295.002764226	12028675.6243541	12511970.6271183
TCGA-13-0886-01A	10	172	-0.968768478219629	536994.447515806	4671851.69338751	5208846.14090332
TCGA-13-0887-01A	16	499	0.178655626908763	698092.781770548	11008386.174074	11706478.9558446
TCGA-13-0888-01A	9	734	0.964279338528203	429595.558012645	18848505.1078048	19278100.6658174
TCGA-13-0889-01A	13	282	-0.579402340443328	644393.337018967	7732720.04422761	8377113.38124658
TCGA-13-0890-01A	17	291	-0.534608006008886	805491.671273709	7679020.59947603	8484512.27074974
TCGA-13-0891-01A	6	911	1.56383427634304	322196.668509484	23037061.7984281	23359258.4669376
TCGA-13-0893-01B	5	822	1.25371965333537	214797.779006322	20083592.3370911	20352089.5608491
TCGA-13-0894-01B	19	339	-0.362322104337956	1020289.45028003	8323413.93649499	9343703.38677503
TCGA-13-0897-01A	7	337	-0.410562156805817	268497.223757903	7410523.37571812	7679020.59947603
TCGA-13-0899-01A	21	341	-0.348539232204282	1073988.89503161	7840118.93373077	8914107.82876238
TCGA-13-0900-01B	19	425	-0.065990353463957	1020289.45028003	9934397.27904241	10954686.7293224
TCGA-13-0901-01B	13	658	0.716187640122064	644393.337018967	13102664.5193857	13747057.8564046
TCGA-13-0903-01A	12	416	-0.121121841998655	644393.337018967	8108616.15748867	8753009.49450764
TCGA-13-0904-01A	11	635	0.6300446892866	429595.558012645	14337751.748672	14767347.3066847
TCGA-13-0905-01B	9	443	-0.0384246091966082	375896.113261064	8967807.27351396	9343703.38677503
TCGA-13-0906-01A	23	245	-0.67243672734563	1020289.45028003	5369944.47515806	6390233.92543809
TCGA-13-0908-01B	7	273	-0.631088110944607	375896.113261064	5584742.25416438	5960638.36742545
TCGA-13-0910-01A	19	446	0.00636972523783358	966590.005528451	11062085.6188256	12028675.6243541
TCGA-13-0911-01A	17	356	-0.310636333836677	859191.11602529	8699310.04975606	9558501.16578135
TCGA-13-0912-01A	12	261	-0.655208137178537	644393.337018967	6121736.70168019	6766130.03869916
TCGA-13-0913-01A	23	499	0.202775653142694	1127688.33978319	10471391.7265582	11599080.0663414
TCGA-13-0916-01A	21	543	0.347495810546275	1073988.89503161	11491681.1768383	12565670.0718699
TCGA-13-0919-01A	12	237	-0.737905369980583	644393.337018967	5531042.8094128	6175436.14643177
TCGA-13-0920-01A	3	902	1.52248565994202	161098.334254742	25668334.5912555	25829432.9255103
TCGA-13-0921-01A	16	530	0.28547288594474	751792.226522129	11974976.1796025	12726768.4061246
TCGA-13-0923-01A	14	400	-0.169361894466515	590693.892267387	8967807.27351396	9558501.16578135
TCGA-13-0924-01A	13	150	-1.03423712085458	698092.781770548	3060868.35084009	3758961.13261064
TCGA-13-1403-01A	12	370	-0.27962487153591	536994.447515806	6927228.3729539	7464222.82046971
TCGA-13-1404-01A	28	371	-0.221047664967794	1288786.67403793	7464222.82046971	8753009.49450764
TCGA-13-1405-01A	23	673	0.802330590957529	1181387.78453477	18096712.8812827	19278100.6658174
TCGA-13-1407-01A	28	396	-0.134904714132329	1288786.67403793	8054916.71273709	9343703.38677503
TCGA-13-1408-01A	13	533	0.28547288594474	536994.447515806	14230352.8591689	14767347.3066847
TCGA-13-1409-01A	31	284	-0.510487979774956	1396185.5635411	4510753.35913277	5906938.92267387
TCGA-13-1410-01A	19	705	0.89881069589325	751792.226522129	16002434.535971	16754226.7624932
TCGA-13-1411-01A	18	273	-0.593185212577002	966590.005528451	6766130.03869916	7732720.04422761
TCGA-13-1412-01A	11	224	-0.786145422448444	429595.558012645	4403354.46962961	4832950.02764225
TCGA-13-1481-01A	8	293	-0.558728032242816	375896.113261064	7517922.26522129	7893818.37848235
TCGA-13-1482-01A	8	301	-0.531162287975467	429595.558012645	8538211.71550132	8967807.27351396
TCGA-13-1483-01A	14	219	-0.793036858515281	751792.226522129	6229135.59118335	6980927.81770548
TCGA-13-1484-01A	23	153	-0.989442786420141	1235087.22928635	4564452.80388435	5799540.03317071
TCGA-13-1485-01A	6	76	-1.31334028156149	268497.223757903	1986879.45580848	2255376.67956639
TCGA-13-1488-01A	8	310	-0.5001508256747	322196.668509484	8914107.82876238	9236304.49727187
TCGA-13-1489-01A	22	521	0.275135731844484	1127688.33978319	11437981.7320867	12565670.0718699
TCGA-13-1491-01A	21	487	0.154535600674833	1073988.89503161	11652779.511093	12726768.4061246
TCGA-13-1494-01A	15	270	-0.613859520777514	751792.226522129	8216015.04699183	8967807.27351396
TCGA-13-1495-01A	6	839	1.3157425779369	322196.668509484	23251859.5774344	23574056.2459439
TCGA-13-1496-01A	11	428	-0.0832189436310499	590693.892267387	11330582.8425835	11921276.7348509
TCGA-13-1497-01A	6	660	0.698959049954971	268497.223757903	14821046.7514362	15143243.4199457
TCGA-13-1498-01A	9	365	-0.307190615803259	375896.113261064	9343703.38677503	9719599.50003609
TCGA-13-1499-01A	9	185	-0.927419861818606	483295.002764226	4994048.361897	5477343.36466122
TCGA-13-1500-01A	13	177	-0.94120273395228	698092.781770548	5101447.25140016	5799540.03317071
TCGA-13-1501-01A	10	315	-0.47603079944077	483295.002764226	8216015.04699183	8699310.04975606
TCGA-13-1504-01A	13	438	-0.0418703272300268	590693.892267387	11974976.1796025	12565670.0718699
TCGA-13-1506-01A	10	582	0.443975915481995	375896.113261064	14928445.6409394	15304341.7542005
TCGA-13-1507-01A	15	380	-0.234830537101468	698092.781770548	12350872.2928635	13048965.0746341
TCGA-13-1509-01A	14	461	0.0408269055720195	751792.226522129	11760178.4005962	12511970.6271183
TCGA-13-1511-01A	1	647	0.636936125353437	53699.4447515806	20620586.784607	20674286.2293585
TCGA-13-1512-01A	11	470	0.0615012137725311	590693.892267387	10686189.5055645	11276883.3978319
TCGA-13-1817-01A	9	1888	4.94063794909326	483295.002764226	54612335.3123575	55149329.7598733
TCGA-13-1819-01A	0	2507	7.04252594947861	0	78025293.2240466	78078992.6687982
TCGA-13-2057-01A	16	603	0.537010302384297	859191.11602529	15143243.4199457	16002434.535971
TCGA-13-2059-01A	12	807	1.22615390906802	483295.002764226	22446367.9061607	22929662.9089249
TCGA-13-2060-01A	10	648	0.671393305687623	536994.447515806	17398620.0995121	17935614.5470279
TCGA-13-2061-01A	5	1280	2.83185851264108	268497.223757903	43120654.1355192	43389151.3592771
TCGA-13-2065-01A	14	339	-0.379550694505049	751792.226522129	8108616.15748867	8860408.3840108
TCGA-13-2066-01A	0	2159	5.84341607384894	0	74266332.091436	74266332.091436
TCGA-13-2071-01A	9	339	-0.396779284672142	483295.002764226	10149195.0580487	10632490.060813
TCGA-13-A5FT-01A	0	789	1.12278236806546	0	22875963.4641733	22875963.4641733
TCGA-13-A5FU-01A	14	368	-0.27962487153591	698092.781770548	9504801.72102977	10202894.5028003
TCGA-14-0736-01A	20	209	1.04045176323408	1073988.89503161	5208846.14090332	6282835.03593493
TCGA-14-0740-01B	7	259	1.45553705734115	375896.113261064	8806708.93925922	9182605.05252028
TCGA-14-0781-01B	0	45	-1.02375618583893	0	2309076.12431797	2309076.12431797
TCGA-14-0783-01B	14	116	-0.070181861538897	698092.781770548	3544163.35360432	4242256.13537487
TCGA-14-0786-01B	5	82	-0.552578284420088	268497.223757903	2201677.2348148	2470174.45857271
TCGA-14-0787-01A	6	132	0.0195663101599292	322196.668509484	4618152.24863593	4940348.91714542
TCGA-14-0789-01A	5	48	-0.9340080141401	268497.223757903	1718382.23205058	1986879.45580848
TCGA-14-0790-01B	8	82	-0.518922720033028	322196.668509484	2470174.45857271	2792371.12708219
TCGA-14-0812-01B	3	187	0.6029294262023	161098.334254742	4940348.91714542	5101447.25140016
TCGA-14-0813-01A	10	116	-0.11505594738831	483295.002764226	3812660.57736222	4295955.58012645
TCGA-14-0817-01A	10	136	0.109314481858755	536994.447515806	3812660.57736222	4349655.02487803
TCGA-14-0862-01B	11	89	-0.406737505409495	590693.892267387	3060868.35084009	3651562.24310748
TCGA-14-0865-01B	19	189	0.804862812524659	966590.005528451	5369944.47515806	6336534.48068651
TCGA-14-0866-01B	7	93	-0.406737505409495	375896.113261064	3168267.24034326	3544163.35360432
TCGA-14-0867-01A	11	62	-0.709637584893034	590693.892267387	1772081.67680216	2362775.56906955
TCGA-14-0871-01A	17	553	4.86596758189655	698092.781770548	16270931.7597289	16969024.5414995
TCGA-14-1034-01A	11	45	-0.90035244975304	590693.892267387	1772081.67680216	2362775.56906955
TCGA-14-1037-01A	4	61	-0.79938575659186	214797.779006322	1825781.12155374	2040578.90056006
TCGA-14-1043-01B	5	45	-0.96766357852716	268497.223757903	1503584.45304426	1772081.67680216
TCGA-14-1395-01B	7	75	-0.608670891731855	375896.113261064	2631272.79282745	3007168.90608851
TCGA-14-1396-01A	11	94	-0.350644898097729	536994.447515806	2953469.46133693	3490463.90885274
TCGA-14-1401-01A	4	62	-0.788167235129507	214797.779006322	1718382.23205058	1933180.0110569
TCGA-14-1402-01A	4	187	0.614147947664653	214797.779006322	5960638.36742545	6175436.14643177
TCGA-14-1450-01B	6	101	-0.328207855173023	322196.668509484	2899770.01658535	3221966.68509484
TCGA-14-1451-01A	4	126	-0.070181861538897	214797.779006322	4188556.69062329	4403354.46962961
TCGA-14-1452-01A	4	133	0.00834778869757593	214797.779006322	3651562.24310748	3866360.0221138
TCGA-14-1453-01A	26	311	2.25205208116823	1288786.67403793	7410523.37571812	8699310.04975606
TCGA-14-1454-01A	14	66	-0.631107934656561	698092.781770548	1772081.67680216	2470174.45857271
TCGA-14-1455-01A	5	114	-0.193585597624783	214797.779006322	3329365.574598	3544163.35360432
TCGA-14-1456-01B	1	146	0.120533003321109	53699.4447515806	5799540.03317071	5853239.47792229
TCGA-14-1458-01A	5	130	-0.0140892542271306	268497.223757903	4403354.46962961	4671851.69338751
TCGA-14-1459-01A	3	112	-0.238459683474196	161098.334254742	3329365.574598	3490463.90885274
TCGA-14-1794-01A	8	75	-0.597452370269501	429595.558012645	2792371.12708219	3221966.68509484
TCGA-14-1795-01A	2	47	-0.978882099989513	107398.889503161	1664682.787299	1772081.67680216
TCGA-14-1821-01A	4	208	0.849736898374072	161098.334254742	6282835.03593493	6443933.37018967
TCGA-14-1823-01A	15	204	0.928266548610545	751792.226522129	4779250.58289067	5531042.8094128
TCGA-14-1825-01A	9	138	0.120533003321109	429595.558012645	4027458.35636855	4457053.91438119
TCGA-14-1827-01A	4	106	-0.294552290785963	214797.779006322	3007168.90608851	3221966.68509484
TCGA-14-1829-01A	5	123	-0.0926189044636036	268497.223757903	3758961.13261064	4027458.35636855
TCGA-14-2554-01A	8	171	0.479525690116414	429595.558012645	5692141.14366754	6121736.70168019
TCGA-14-2555-01B	12	196	0.804862812524659	322196.668509484	4832950.02764225	5155146.69615174
TCGA-14-3476-01B	2	247	1.26482219248114	107398.889503161	6712430.59394758	6819829.48345074
TCGA-14-3477-01A	18	622	5.65126408426128	859191.11602529	18902204.5525564	19761395.6685817
TCGA-14-4157-01A	6	122	-0.0926189044636036	322196.668509484	4134857.24587171	4457053.91438119
TCGA-15-0742-01A	7	187	0.647803512051713	322196.668509484	5799540.03317071	6121736.70168019
TCGA-15-1444-01A	2	89	-0.507704198570675	107398.889503161	3544163.35360432	3651562.24310748
TCGA-15-1446-01A	3	84	-0.552578284420088	161098.334254742	2846070.57183377	3007168.90608851
TCGA-15-1447-01A	24	98	-0.159930033237723	1235087.22928635	2577573.34807587	3812660.57736222
TCGA-15-1449-01A	18	117	-0.0140892542271306	859191.11602529	3329365.574598	4242256.13537487
TCGA-16-0846-01A	5	119	-0.137492990313017	268497.223757903	3705261.68785906	3973758.91161696
TCGA-16-0848-01A	6	181	0.56927386181524	268497.223757903	5316245.03040648	5584742.25416438
TCGA-16-0849-01A	5	79	-0.586233848807148	214797.779006322	2416475.01382113	2631272.79282745
TCGA-16-0850-01A	30	261	1.73600009389998	1288786.67403793	6336534.48068651	7625321.15472445
TCGA-16-0861-01A	8	153	0.277592303794055	322196.668509484	4510753.35913277	4832950.02764225
TCGA-16-1045-01B	6	93	-0.417956026871849	322196.668509484	3114567.79559168	3436764.46410116
TCGA-16-1047-01B	4	98	-0.384300462484789	214797.779006322	2953469.46133693	3168267.24034326
TCGA-16-1055-01B	7	86	-0.485267155645968	268497.223757903	2577573.34807587	2846070.57183377
TCGA-16-1056-01B	6	179	0.546836818890533	322196.668509484	6605031.70444442	6927228.3729539
TCGA-16-1060-01A	5	101	-0.339426376635376	268497.223757903	3114567.79559168	3383065.01934958
TCGA-16-1062-01A	6	107	-0.260896726398903	322196.668509484	3597862.7983559	3920059.46686538
TCGA-16-1063-01B	4	142	0.109314481858755	214797.779006322	4510753.35913277	4725551.13813909
TCGA-16-1460-01A	1	127	-0.0926189044636036	53699.4447515806	4134857.24587171	4188556.69062329
TCGA-18-3406-01A	6	232	0.00489014148364353	322196.668509484	6282835.03593493	6605031.70444442
TCGA-18-3407-01A	9	225	-0.0157366188205299	429595.558012645	7571621.70997287	8001217.26798551
TCGA-18-3408-01A	8	121	-0.557189076805081	375896.113261064	3114567.79559168	3490463.90885274
TCGA-18-3409-01A	10	64	-0.840807030987465	536994.447515806	2094278.34531164	2684972.23757903
TCGA-18-3410-01A	8	814	3.01639714589296	429595.558012645	25722034.0360071	26151629.5940198
TCGA-18-3411-01A	2	1012	4.00648164049328	107398.889503161	33884349.6382474	33991748.5277505
TCGA-18-3412-01A	11	625	2.0572527917489	590693.892267387	15304341.7542005	15895035.6464679
TCGA-18-3414-01A	14	289	0.340074996426461	644393.337018967	6980927.81770548	7625321.15472445
TCGA-18-3415-01A	16	234	0.0667704223961637	805491.671273709	6282835.03593493	7088326.70720864
TCGA-18-3416-01A	21	344	0.659789781141149	1127688.33978319	8430812.82599816	9612200.61053293
TCGA-18-3417-01A	18	170	-0.252944362318524	859191.11602529	4510753.35913277	5369944.47515806
TCGA-18-3419-01A	9	173	-0.283884502774784	483295.002764226	4403354.46962961	4886649.47239384
TCGA-18-3421-01A	7	364	0.690729921597409	375896.113261064	9988096.72379399	10363992.8370551
TCGA-18-4083-01A	14	381	0.814490483422449	644393.337018967	9021506.71826554	9665900.05528451
TCGA-18-4086-01A	3	185	-0.252944362318524	161098.334254742	5584742.25416438	5799540.03317071
TCGA-18-4721-01A	8	148	-0.417958444751911	429595.558012645	4564452.80388435	4994048.361897
TCGA-18-5592-01A	20	385	0.866057384182882	966590.005528451	12189773.9586088	13156363.9641373
TCGA-18-5595-01A	5	88	-0.742829919542642	268497.223757903	2040578.90056006	2309076.12431797
TCGA-19-0955-01A	7	75	-0.608670891731855	375896.113261064	2577573.34807587	2953469.46133693
TCGA-19-0957-01C	3	127	-0.070181861538897	161098.334254742	3758961.13261064	3920059.46686538
TCGA-19-0960-01A	7	113	-0.18236707616243	375896.113261064	2416475.01382113	2792371.12708219
TCGA-19-0962-01B	5	98	-0.373081941022436	268497.223757903	3329365.574598	3597862.7983559
TCGA-19-0963-01B	2	142	0.0868774389340489	107398.889503161	4295955.58012645	4403354.46962961
TCGA-19-0964-01A	2	103	-0.350644898097729	107398.889503161	3651562.24310748	3758961.13261064
TCGA-19-1385-01A	2	92	-0.474048634183615	107398.889503161	4081157.80112013	4188556.69062329
TCGA-19-1386-01A	7	107	-0.24967820493655	375896.113261064	3812660.57736222	4188556.69062329
TCGA-19-1387-01A	1	175	0.445870125729354	53699.4447515806	4349655.02487803	4403354.46962961
TCGA-19-1388-01A	14	315	2.16230390946941	751792.226522129	9397402.83152661	10149195.0580487
TCGA-19-1389-01A	5	111	-0.227241162011843	268497.223757903	3866360.0221138	4134857.24587171
TCGA-19-1390-01A	12	306	2.03890017338352	644393.337018967	8216015.04699183	8860408.3840108
TCGA-19-1392-01A	11	209	0.939485070072898	483295.002764226	5316245.03040648	5799540.03317071
TCGA-19-1786-01A	8	228	1.11898141347055	429595.558012645	6658731.149196	7088326.70720864
TCGA-19-1787-01B	14	110	-0.137492990313017	429595.558012645	2738671.68233061	3168267.24034326
TCGA-19-1788-01A	1	131	-0.0477448186141905	53699.4447515806	4832950.02764225	4886649.47239384
TCGA-19-1789-01A	4	81	-0.575015327344795	214797.779006322	2362775.56906955	2577573.34807587
TCGA-19-1790-01B	3	113	-0.227241162011843	161098.334254742	3490463.90885274	3651562.24310748
TCGA-19-1791-01A	7	141	0.131751524783462	268497.223757903	3651562.24310748	3920059.46686538
TCGA-19-2619-01A	4	351	2.45398546749059	214797.779006322	7840118.93373077	8054916.71273709
TCGA-19-2620-01A	5	180	0.546836818890533	268497.223757903	7034627.26245706	7303124.48621496
TCGA-19-2621-01B	3	154	0.232718217944642	107398.889503161	5745840.58841913	5853239.47792229
TCGA-19-2623-01A	10	142	0.176625610632875	483295.002764226	4027458.35636855	4510753.35913277
TCGA-19-2624-01A	2	170	0.400996039879941	53699.4447515806	3705261.68785906	3758961.13261064
TCGA-19-2625-01A	7	174	0.50196273304112	322196.668509484	5531042.8094128	5853239.47792229
TCGA-19-2629-01A	21	147	0.356121954030528	1020289.45028003	3866360.0221138	4886649.47239384
TCGA-19-2631-01A	4	90	-0.474048634183615	214797.779006322	2684972.23757903	2899770.01658535
TCGA-19-4065-01A	14	90	-0.361863419560082	751792.226522129	2738671.68233061	3490463.90885274
TCGA-19-4068-01A	6	183	0.591710904739947	214797.779006322	4188556.69062329	4403354.46962961
TCGA-19-5947-01A	10	101	-0.283333769323609	483295.002764226	3812660.57736222	4295955.58012645
TCGA-19-5950-01A	5	98	-0.373081941022436	268497.223757903	3383065.01934958	3651562.24310748
TCGA-19-5951-01A	4	69	-0.709637584893034	214797.779006322	2631272.79282745	2846070.57183377
TCGA-19-5952-01A	4	71	-0.687200541968328	214797.779006322	1933180.0110569	2147977.79006322
TCGA-19-5953-01B	4	73	-0.664763499043621	214797.779006322	2362775.56906955	2577573.34807587
TCGA-19-5954-01A	5	95	-0.406737505409495	268497.223757903	2631272.79282745	2899770.01658535
TCGA-19-5955-01A	2	49	-0.956445057064806	107398.889503161	1503584.45304426	1610983.34254742
TCGA-19-5956-01A	4	91	-0.462830112721262	214797.779006322	3114567.79559168	3329365.574598
TCGA-19-5958-01A	4	97	-0.395518983947142	214797.779006322	3060868.35084009	3275666.12984642
TCGA-19-5959-01A	6	77	-0.597452370269501	268497.223757903	2362775.56906955	2631272.79282745
TCGA-19-5960-01A	13	153	0.333684911105821	590693.892267387	4832950.02764225	5423643.91990964
TCGA-19-A60I-01A	9	115	-0.137492990313017	375896.113261064	3114567.79559168	3490463.90885274
TCGA-19-A6J4-01A	16	147	0.300029346718761	859191.11602529	4564452.80388435	5423643.91990964
TCGA-19-A6J5-01A	6	245	1.28725923540585	268497.223757903	7088326.70720864	7356823.93096654
TCGA-20-0987-01A	6	745	0.991845082795552	322196.668509484	26366427.3730261	26688624.0415356
TCGA-20-0990-01A	16	585	0.474987377782763	751792.226522129	13048965.0746341	13800757.3011562
TCGA-20-0996-01A	0	29	-1.49596333733267	0	1342486.11878952	1342486.11878952
TCGA-20-1682-01A	27	342	-0.324419205970352	1235087.22928635	7249425.04146338	8484512.27074974
TCGA-20-1683-01A	14	510	0.209667089209531	644393.337018967	11974976.1796025	12619369.5166214
TCGA-20-1684-01A	2	1229	2.64578973883648	107398.889503161	38126605.7736222	38234004.6631254
TCGA-20-1685-01A	10	413	-0.138350432165747	483295.002764226	10095495.6132972	10578790.6160614
TCGA-20-1686-01A	18	648	0.698959049954971	859191.11602529	14606248.9724299	15465440.0884552
TCGA-20-1687-01A	12	389	-0.214156228900957	590693.892267387	8430812.82599816	9021506.71826554
TCGA-21-1070-01A	16	158	-0.325138023383131	859191.11602529	4027458.35636855	4886649.47239384
TCGA-21-1071-01A	4	178	-0.283884502774784	214797.779006322	4994048.361897	5208846.14090332
TCGA-21-1072-01A	22	134	-0.417958444751911	1127688.33978319	2470174.45857271	3597862.7983559
TCGA-21-1075-01A	17	238	0.0925538727763804	805491.671273709	5423643.91990964	6229135.59118335
TCGA-21-1076-01A	2	186	-0.252944362318524	107398.889503161	5745840.58841913	5853239.47792229
TCGA-21-1077-01A	6	131	-0.515935556196735	322196.668509484	3705261.68785906	4027458.35636855
TCGA-21-1078-01A	2	33	-1.04191794395316	107398.889503161	1127688.33978319	1235087.22928635
TCGA-21-1079-01A	17	116	-0.536562316500908	805491.671273709	3329365.574598	4134857.24587171
TCGA-21-1080-01A	14	292	0.355545066654591	698092.781770548	7947517.82323393	8645610.60500448
TCGA-21-1081-01A	27	237	0.138964083460771	1449885.00829268	5906938.92267387	7356823.93096654
TCGA-21-1082-01A	16	234	0.0667704223961637	805491.671273709	6497632.81494125	7303124.48621496
TCGA-21-1083-01A	21	282	0.340074996426461	1127688.33978319	7786419.48897919	8914107.82876238
TCGA-21-5782-01A	11	201	-0.129183800493483	536994.447515806	4832950.02764225	5369944.47515806
TCGA-21-5783-01A	17	324	0.536029219316108	805491.671273709	9504801.72102977	10310293.3923035
TCGA-21-5784-01A	2	34	-1.03676125387711	107398.889503161	1288786.67403793	1396185.5635411
TCGA-21-5786-01A	31	280	0.381328517034808	1449885.00829268	6605031.70444442	8054916.71273709
TCGA-21-5787-01A	9	234	0.0306735918638603	429595.558012645	6927228.3729539	7356823.93096654
TCGA-21-A5DI-01A	11	212	-0.0724602096570067	590693.892267387	4886649.47239384	5477343.36466122
TCGA-22-0940-01A	8	146	-0.428271824903998	429595.558012645	4027458.35636855	4457053.91438119
TCGA-22-0944-01A	13	156	-0.350921473763347	644393.337018967	4564452.80388435	5208846.14090332
TCGA-22-1000-01A	0	28	-1.07801477448546	0	1127688.33978319	1127688.33978319
TCGA-22-1002-01A	6	158	-0.376704924143564	322196.668509484	4618152.24863593	4940348.91714542
TCGA-22-1005-01A	0	75	-0.835650340911422	0	2953469.46133693	2953469.46133693
TCGA-22-1011-01A	1	60	-0.907844001976029	53699.4447515806	1772081.67680216	1825781.12155374
TCGA-22-1012-01A	16	194	-0.13949718064557	805491.671273709	5584742.25416438	6390233.92543809
TCGA-22-1016-01A	6	226	-0.0260499989726166	322196.668509484	6927228.3729539	7249425.04146338
TCGA-22-1017-01A	7	346	0.597909500228628	375896.113261064	9451102.27627819	9826998.38953925
TCGA-22-4591-01A	19	454	1.21671230935383	751792.226522129	9290003.94202345	10041796.1685456
TCGA-22-4593-01A	16	336	0.592752810152585	644393.337018967	8377113.38124658	9021506.71826554
TCGA-22-4594-01A	12	181	-0.227160911938307	644393.337018967	5531042.8094128	6175436.14643177
TCGA-22-4595-01A	13	317	0.479305628479631	698092.781770548	8054916.71273709	8753009.49450764
TCGA-22-4596-01A	2	35	-1.03160456380107	107398.889503161	1235087.22928635	1342486.11878952
TCGA-22-4599-01A	25	129	-0.428271824903998	1235087.22928635	3007168.90608851	4242256.13537487
TCGA-22-4601-01A	4	649	2.14491652304163	214797.779006322	19707696.2238301	19976193.447588
TCGA-22-4604-01A	18	242	0.118337323156597	751792.226522129	5745840.58841913	6497632.81494125
TCGA-22-4605-01A	8	49	-0.928470762280202	429595.558012645	1503584.45304426	1933180.0110569
TCGA-22-4607-01A	11	132	-0.484995415740474	590693.892267387	3758961.13261064	4349655.02487803
TCGA-22-4609-01A	16	87	-0.691263018782208	805491.671273709	2255376.67956639	3060868.35084009
TCGA-22-4613-01A	13	308	0.432895417795241	698092.781770548	7893818.37848235	8591911.1602529
TCGA-22-5471-01A	16	258	0.190530984221204	698092.781770548	5799540.03317071	6497632.81494125
TCGA-22-5472-01A	9	61	-0.861433791291639	483295.002764226	2094278.34531164	2577573.34807587
TCGA-22-5473-01A	21	285	0.355545066654591	1020289.45028003	7517922.26522129	8538211.71550132
TCGA-22-5474-01A	11	85	-0.727359849314512	590693.892267387	2309076.12431797	2899770.01658535
TCGA-22-5477-01A	23	296	0.422582037643155	912890.56077687	6068037.25692861	6980927.81770548
TCGA-22-5478-01A	14	303	0.412268657491068	698092.781770548	7195725.5967118	7893818.37848235
TCGA-22-5479-01A	2	172	-0.325138023383131	107398.889503161	5745840.58841913	5853239.47792229
TCGA-22-5480-01A	11	102	-0.639696118021775	483295.002764226	2953469.46133693	3436764.46410116
TCGA-22-5481-01A	16	285	0.329761616274374	859191.11602529	5960638.36742545	6819829.48345074
TCGA-22-5482-01A	16	123	-0.505622176044648	751792.226522129	3490463.90885274	4242256.13537487
TCGA-22-5483-01A	20	368	0.778393652890146	966590.005528451	10417692.2818066	11384282.2873351
TCGA-22-5485-01A	15	112	-0.567502456957168	751792.226522129	3383065.01934958	4134857.24587171
TCGA-22-5489-01A	7	150	-0.412801754675868	375896.113261064	4295955.58012645	4671851.69338751
TCGA-22-5491-01A	15	261	0.200844364373291	751792.226522129	6121736.70168019	6873528.92820232
TCGA-22-5492-01A	14	164	-0.304511263078957	698092.781770548	4295955.58012645	4994048.361897
TCGA-22-A5C4-01A	14	618	2.03662603144472	698092.781770548	14928445.6409394	15626538.42271
TCGA-23-1021-01B	21	270	-0.593185212577002	1127688.33978319	5208846.14090332	6336534.48068651
TCGA-23-1022-01A	12	542	0.313038630212089	429595.558012645	11223183.9530803	11652779.511093
TCGA-23-1023-01A	6	139	-1.09626004545612	268497.223757903	3705261.68785906	3973758.91161696
TCGA-23-1024-01A	18	397	-0.165916176433096	751792.226522129	10578790.6160614	11330582.8425835
TCGA-23-1026-01B	5	231	-0.782699704415025	214797.779006322	5262545.5856549	5477343.36466122
TCGA-23-1027-01A	15	239	-0.72067677981349	805491.671273709	5369944.47515806	6175436.14643177
TCGA-23-1028-01A	18	424	-0.0728817895307941	912890.56077687	8967807.27351396	9880697.83429083
TCGA-23-1029-01B	12	219	-0.799928294582118	590693.892267387	4779250.58289067	5369944.47515806
TCGA-23-1030-01A	13	446	-0.014304582962678	698092.781770548	12082375.0691056	12780467.8508762
TCGA-23-1031-01A	10	354	-0.341647796137445	429595.558012645	8162315.60224025	8591911.1602529
TCGA-23-1032-01A	2	618	0.540456020417716	107398.889503161	20996482.897868	21103881.7873712
TCGA-23-1107-01A	14	183	-0.91708270771835	751792.226522129	5262545.5856549	6014337.81217703
TCGA-23-1109-01A	17	280	-0.572510904376491	751792.226522129	7410523.37571812	8162315.60224025
TCGA-23-1111-01A	16	464	0.0580554957391125	805491.671273709	12619369.5166214	13424861.1878952
TCGA-23-1113-01A	31	186	-0.848168347049978	1664682.787299	4242256.13537487	5906938.92267387
TCGA-23-1114-01B	14	639	0.65416471552053	644393.337018967	14176653.4144173	14821046.7514362
TCGA-23-1116-01A	12	262	-0.651762419145118	590693.892267387	7249425.04146338	7840118.93373077
TCGA-23-1117-01A	8	474	0.0649469318059497	429595.558012645	12082375.0691056	12511970.6271183
TCGA-23-1118-01A	10	327	-0.434682183039747	536994.447515806	9504801.72102977	10041796.1685456
TCGA-23-1119-01A	9	340	-0.393333566638724	483295.002764226	8430812.82599816	8914107.82876238
TCGA-23-1120-01A	11	546	0.323375784312344	429595.558012645	13424861.1878952	13854456.7459078
TCGA-23-1121-01A	7	958	1.72922874194713	214797.779006322	21587176.7901354	21801974.5691417
TCGA-23-1122-01A	8	399	-0.193481920700445	375896.113261064	10202894.5028003	10578790.6160614
TCGA-23-1123-01A	20	519	0.26135285971081	1020289.45028003	12619369.5166214	13639658.9669015
TCGA-23-1124-01A	9	676	0.764427692589925	375896.113261064	16432030.0939837	16807926.2072447
TCGA-23-1809-01A	14	513	0.220004243309787	483295.002764226	10739888.9503161	11223183.9530803
TCGA-23-2072-01A	16	537	0.30959291217867	805491.671273709	13961855.635411	14767347.3066847
TCGA-23-2077-01A	11	451	-0.00396742886242221	536994.447515806	10256593.9475519	10793588.3950677
TCGA-23-2078-01A	8	374	-0.27962487153591	429595.558012645	11384282.2873351	11813877.8453477
TCGA-23-2079-01A	11	336	-0.400225002705561	483295.002764226	6443933.37018967	6927228.3729539
TCGA-23-2081-01A	12	290	-0.555282314209398	536994.447515806	6605031.70444442	7142026.15196022
TCGA-23-2084-01A	16	299	-0.510487979774956	751792.226522129	6068037.25692861	6819829.48345074
TCGA-23-2641-01A	13	526	0.26135285971081	698092.781770548	12995265.6298825	13693358.4116531
TCGA-23-2643-01A	18	510	0.223449961343205	805491.671273709	13478560.6326467	14284052.3039204
TCGA-23-2645-01A	7	797	1.17446813856674	322196.668509484	22768564.5746702	23090761.2431797
TCGA-23-2647-01A	2	1453	3.41763057832224	107398.889503161	55793723.0968923	55901121.9863954
TCGA-23-2649-01A	0	1753	4.44445455228099	0	63687541.4753746	63687541.4753746
TCGA-24-0966-01A	9	343	-0.382996412538468	429595.558012645	8806708.93925922	9236304.49727187
TCGA-24-0968-01A	5	409	-0.169361894466515	268497.223757903	11813877.8453477	12082375.0691056
TCGA-24-0970-01B	9	434	-0.0694360714973755	483295.002764226	12887866.7403793	13371161.7431436
TCGA-24-0975-01B	14	125	-1.11693435365663	698092.781770548	3329365.574598	4027458.35636855
TCGA-24-0979-01A	12	513	0.213112807242949	536994.447515806	12136074.5138572	12673068.961373
TCGA-24-0980-01A	9	181	-0.94120273395228	483295.002764226	3168267.24034326	3651562.24310748
TCGA-24-0982-01A	24	342	-0.334756360070607	1181387.78453477	8914107.82876238	10095495.6132972
TCGA-24-1103-01A	17	408	-0.13145899609891	805491.671273709	8377113.38124658	9182605.05252028
TCGA-24-1104-01A	12	207	-0.841276910983141	536994.447515806	4403354.46962961	4940348.91714542
TCGA-24-1105-01A	19	398	-0.159024740366259	966590.005528451	10525091.1713098	11491681.1768383
TCGA-24-1413-01A	32	177	-0.875734091317327	1610983.34254742	3866360.0221138	5477343.36466122
TCGA-24-1416-01A	9	180	-0.944648451985699	429595.558012645	3973758.91161696	4403354.46962961
TCGA-24-1417-01A	19	307	-0.472585081407351	912890.56077687	8216015.04699183	9128905.6077687
TCGA-24-1418-01A	18	357	-0.30374489776984	966590.005528451	9504801.72102977	10471391.7265582
TCGA-24-1419-01A	14	199	-0.861951219183653	536994.447515806	4779250.58289067	5316245.03040648
TCGA-24-1422-01A	9	539	0.292364322011577	483295.002764226	15626538.42271	16109833.4254742
TCGA-24-1423-01A	12	288	-0.562173750276235	590693.892267387	6873528.92820232	7464222.82046971
TCGA-24-1424-01A	18	512	0.230341397410042	912890.56077687	13585959.5221499	14498850.0829268
TCGA-24-1425-01A	14	213	-0.813711166715792	644393.337018967	5423643.91990964	6068037.25692861
TCGA-24-1426-01A	13	836	1.32952545007057	644393.337018967	23788854.0249502	24433247.3619692
TCGA-24-1427-01A	14	331	-0.407116438772398	751792.226522129	8269714.49174341	9021506.71826554
TCGA-24-1428-01A	10	584	0.450867351548833	483295.002764226	12511970.6271183	12995265.6298825
TCGA-24-1430-01A	14	294	-0.534608006008886	698092.781770548	6497632.81494125	7195725.5967118
TCGA-24-1434-01A	10	307	-0.503596543708119	483295.002764226	9719599.50003609	10202894.5028003
TCGA-24-1435-01A	6	353	-0.358876386304538	322196.668509484	9451102.27627819	9773298.94478767
TCGA-24-1436-01A	12	289	-0.558728032242816	590693.892267387	9021506.71826554	9665900.05528451
TCGA-24-1463-01A	19	268	-0.606968084710677	912890.56077687	6766130.03869916	7679020.59947603
TCGA-24-1464-01A	13	257	-0.665545291278793	644393.337018967	6282835.03593493	6927228.3729539
TCGA-24-1466-01A	2	1317	2.94901292577731	107398.889503161	41402271.9034687	41509670.7929718
TCGA-24-1467-01A	8	276	-0.617305238810932	429595.558012645	7786419.48897919	8216015.04699183
TCGA-24-1469-01A	8	571	0.399181581047554	322196.668509484	17613417.8785184	17935614.5470279
TCGA-24-1470-01A	8	290	-0.569065186343072	322196.668509484	8216015.04699183	8538211.71550132
TCGA-24-1471-01A	20	309	-0.462247927307096	1073988.89503161	9075206.16301712	10149195.0580487
TCGA-24-1474-01A	9	490	0.123524138374066	483295.002764226	11706478.9558446	12189773.9586088
TCGA-24-1544-01A	19	480	0.123524138374066	912890.56077687	11706478.9558446	12619369.5166214
TCGA-24-1545-01A	17	157	-0.996334222486978	859191.11602529	4242256.13537487	5101447.25140016
TCGA-24-1546-01A	6	270	-0.644870983078281	322196.668509484	7303124.48621496	7625321.15472445
TCGA-24-1548-01A	28	280	-0.534608006008886	1449885.00829268	5853239.47792229	7303124.48621496
TCGA-24-1549-01A	8	483	0.0959583941067171	375896.113261064	12404571.7376151	12780467.8508762
TCGA-24-1550-01A	7	398	-0.200373356767282	375896.113261064	11008386.174074	11384282.2873351
TCGA-24-1551-01A	5	847	1.33986260417083	268497.223757903	29051399.6106051	29319896.834363
TCGA-24-1552-01A	14	575	0.43363876138174	644393.337018967	15089543.9751942	15733937.3122131
TCGA-24-1553-01A	4	482	0.0787298039396241	214797.779006322	15572838.9779584	15787636.7569647
TCGA-24-1555-01A	10	140	-1.07903145528902	375896.113261064	3597862.7983559	3973758.91161696
TCGA-24-1556-01A	6	477	0.0683926498393683	322196.668509484	10900987.2845709	11223183.9530803
TCGA-24-1557-01A	7	559	0.354387246613112	375896.113261064	13263762.8536404	13639658.9669015
TCGA-24-1558-01A	16	494	0.16142703674167	805491.671273709	11008386.174074	11813877.8453477
TCGA-24-1560-01A	15	128	-1.10315148152295	751792.226522129	3866360.0221138	4618152.24863593
TCGA-24-1562-01A	10	143	-1.06869430118877	536994.447515806	4027458.35636855	4564452.80388435
TCGA-24-1563-01A	9	317	-0.472585081407351	429595.558012645	7088326.70720864	7517922.26522129
TCGA-24-1564-01A	9	175	-0.961877042152792	429595.558012645	4832950.02764225	5262545.5856549
TCGA-24-1565-01A	7	104	-1.21341445859235	375896.113261064	4134857.24587171	4510753.35913277
TCGA-24-1567-01A	25	381	-0.196927638733864	1235087.22928635	7732720.04422761	8967807.27351396
TCGA-24-1603-01A	25	211	-0.782699704415025	1342486.11878952	5423643.91990964	6766130.03869916
TCGA-24-1604-01A	12	388	-0.217601946934375	590693.892267387	9343703.38677503	9934397.27904241
TCGA-24-1614-01A	21	356	-0.296853461703003	1020289.45028003	7142026.15196022	8162315.60224025
TCGA-24-1616-01A	14	411	-0.13145899609891	751792.226522129	10256593.9475519	11008386.174074
TCGA-24-1842-01A	1	852	1.34330832220425	53699.4447515806	25131340.1437397	25238739.0332429
TCGA-24-1843-01A	12	549	0.337158656446019	590693.892267387	15841336.2017163	16432030.0939837
TCGA-24-1844-01A	18	360	-0.293407743669584	805491.671273709	8216015.04699183	9021506.71826554
TCGA-24-1845-01A	11	565	0.388844426947298	536994.447515806	14176653.4144173	14713647.8619331
TCGA-24-1846-01A	25	403	-0.121121841998655	1288786.67403793	6980927.81770548	8269714.49174341
TCGA-24-1847-01A	9	461	0.0235983154049266	429595.558012645	11545380.6215898	11974976.1796025
TCGA-24-1849-01A	6	140	-1.0928143274227	322196.668509484	3383065.01934958	3705261.68785906
TCGA-24-1850-01A	8	845	1.34330832220425	429595.558012645	19600297.3343269	20029892.8923396
TCGA-24-1852-01A	15	663	0.740307666355995	751792.226522129	14767347.3066847	15519139.5332068
TCGA-24-1920-01A	0	1954	5.13704387699812	0	56652914.2129175	56706613.6576691
TCGA-24-1923-01A	13	208	-0.834385474916304	698092.781770548	5906938.92267387	6605031.70444442
TCGA-24-1924-01A	8	584	0.443975915481995	429595.558012645	14552549.5276783	14982145.085691
TCGA-24-1927-01A	8	425	-0.103893251831562	429595.558012645	9504801.72102977	9934397.27904241
TCGA-24-1928-01A	21	434	-0.0280874550963524	859191.11602529	10578790.6160614	11437981.7320867
TCGA-24-1930-01A	15	340	-0.372659258438212	805491.671273709	7303124.48621496	8108616.15748867
TCGA-24-2019-01A	12	582	0.450867351548833	590693.892267387	13693358.4116531	14337751.748672
TCGA-24-2020-01A	18	735	0.998736518862389	698092.781770548	15895035.6464679	16593128.4282384
TCGA-24-2023-01A	6	1359	3.10751595531457	322196.668509484	35924928.5388074	36247125.2073169
TCGA-24-2024-01A	22	284	-0.541499442075723	1181387.78453477	6229135.59118335	7410523.37571812
TCGA-24-2026-01A	7	977	1.79469738458209	375896.113261064	28407006.2735861	28782902.3868472
TCGA-24-2027-01A	22	526	0.292364322011577	1181387.78453477	11276883.3978319	12458271.1823667
TCGA-24-2029-01A	10	210	-0.837831192949723	536994.447515806	5692141.14366754	6229135.59118335
TCGA-24-2030-01A	8	860	1.39499409270553	375896.113261064	20781685.1188617	21157581.2321228
TCGA-24-2033-01A	5	500	0.144198446574577	214797.779006322	11760178.4005962	11974976.1796025
TCGA-24-2035-01A	4	255	-0.703448189646397	214797.779006322	5906938.92267387	6121736.70168019
TCGA-24-2036-01A	5	259	-0.686219599479304	268497.223757903	5799540.03317071	6068037.25692861
TCGA-24-2038-01A	4	63	-1.36502605206277	214797.779006322	1664682.787299	1879480.56630532
TCGA-24-2254-01A	26	359	-0.269287717435654	1342486.11878952	7679020.59947603	9021506.71826554
TCGA-24-2260-01A	18	701	0.881582105726157	751792.226522129	16217232.3149773	16969024.5414995
TCGA-24-2261-01A	18	363	-0.283070589569329	859191.11602529	8645610.60500448	9504801.72102977
TCGA-24-2262-01A	6	458	0.00292400720441498	268497.223757903	13854456.7459078	14122953.9696657
TCGA-24-2267-01A	8	470	0.0511640596722753	322196.668509484	13317462.298392	13639658.9669015
TCGA-24-2271-01A	13	158	-1.00667137658723	644393.337018967	5047747.80664858	5692141.14366754
TCGA-24-2280-01A	0	574	0.381952990880461	0	15358041.1989521	15358041.1989521
TCGA-24-2281-01A	5	357	-0.348539232204282	268497.223757903	9934397.27904241	10202894.5028003
TCGA-24-2288-01A	10	556	0.354387246613112	483295.002764226	15787636.7569647	16270931.7597289
TCGA-24-2289-01A	2	618	0.540456020417716	107398.889503161	17935614.5470279	18043013.4365311
TCGA-24-2290-01A	17	452	0.020152597371508	751792.226522129	10686189.5055645	11437981.7320867
TCGA-24-2293-01A	2	277	-0.634533828978025	107398.889503161	8806708.93925922	8914107.82876238
TCGA-24-2295-01A	14	590	0.485324531883019	644393.337018967	12780467.8508762	13424861.1878952
TCGA-24-2297-01A	2	524	0.216558525276368	107398.889503161	11760178.4005962	11867577.2900993
TCGA-24-2298-01A	4	648	0.650718997487111	214797.779006322	19117002.3315627	19331800.110569
TCGA-25-1312-01A	24	593	0.53011886631746	1127688.33978319	13156363.9641373	14284052.3039204
TCGA-25-1313-01A	8	494	0.133861292474322	375896.113261064	11545380.6215898	11921276.7348509
TCGA-25-1314-01A	17	501	0.188992781009019	859191.11602529	8645610.60500448	9504801.72102977
TCGA-25-1315-01A	18	429	-0.0556531993637012	644393.337018967	9075206.16301712	9719599.50003609
TCGA-25-1316-01A	28	46	-1.34090602582884	1396185.5635411	1235087.22928635	2631272.79282745
TCGA-25-1317-01A	33	185	-0.84472262901656	1449885.00829268	4886649.47239384	6336534.48068651
TCGA-25-1318-01A	15	384	-0.221047664967794	644393.337018967	8538211.71550132	9182605.05252028
TCGA-25-1319-01A	15	509	0.209667089209531	751792.226522129	11008386.174074	11760178.4005962
TCGA-25-1320-01A	14	667	0.75064482045625	644393.337018967	15358041.1989521	16002434.535971
TCGA-25-1321-01A	26	398	-0.134904714132329	1181387.78453477	7786419.48897919	8967807.27351396
TCGA-25-1322-01A	6	812	1.2227081910346	322196.668509484	19224401.2210659	19546597.8895753
TCGA-25-1323-01A	15	779	1.14001095823255	590693.892267387	19653996.7790785	20244690.6713459
TCGA-25-1329-01A	28	192	-0.837831192949723	1073988.89503161	4725551.13813909	5799540.03317071
TCGA-25-1623-01A	6	192	-0.913636989684932	322196.668509484	5531042.8094128	5853239.47792229
TCGA-25-1625-01A	10	180	-0.94120273395228	536994.447515806	4188556.69062329	4725551.13813909
TCGA-25-1626-01A	4	79	-1.30989456352807	214797.779006322	2362775.56906955	2577573.34807587
TCGA-25-1627-01A	24	386	-0.183144766600189	1020289.45028003	10149195.0580487	11169484.5083288
TCGA-25-1628-01A	11	172	-0.965322760186211	590693.892267387	5101447.25140016	5692141.14366754
TCGA-25-1630-01A	4	323	-0.469139363373933	214797.779006322	9719599.50003609	9934397.27904241
TCGA-25-1631-01A	16	142	-1.05146571102168	805491.671273709	3758961.13261064	4564452.80388435
TCGA-25-1632-01A	15	403	-0.15557902233284	698092.781770548	9182605.05252028	9880697.83429083
TCGA-25-1633-01A	16	205	-0.834385474916304	751792.226522129	5101447.25140016	5853239.47792229
TCGA-25-1634-01A	21	433	-0.031533173129771	1020289.45028003	10471391.7265582	11491681.1768383
TCGA-25-1635-01A	19	282	-0.558728032242816	1020289.45028003	6175436.14643177	7195725.5967118
TCGA-25-1870-01A	24	518	0.271690013811066	1235087.22928635	12243473.4033604	13478560.6326467
TCGA-25-1871-01A	8	699	0.840233489325134	375896.113261064	14230352.8591689	14606248.9724299
TCGA-25-1877-01A	17	753	1.05731372543051	912890.56077687	17076423.4310026	17989313.9917795
TCGA-25-1878-01A	16	269	-0.613859520777514	590693.892267387	6712430.59394758	7303124.48621496
TCGA-25-2042-01A	10	207	-0.848168347049978	536994.447515806	5638441.69891596	6175436.14643177
TCGA-25-2391-01A	10	197	-0.882625527384164	536994.447515806	4725551.13813909	5262545.5856549
TCGA-25-2392-01A	12	590	0.478433095816181	429595.558012645	17183822.3205058	17613417.8785184
TCGA-25-2393-01A	11	673	0.760981974556506	536994.447515806	16807926.2072447	17344920.6547605
TCGA-25-2396-01A	12	421	-0.103893251831562	536994.447515806	10417692.2818066	10954686.7293224
TCGA-25-2397-01A	10	566	0.388844426947298	483295.002764226	12028675.6243541	12511970.6271183
TCGA-25-2398-01A	11	478	0.0890669580398799	590693.892267387	12941566.1851309	13532260.0773983
TCGA-25-2399-01A	8	243	-0.731013933913746	429595.558012645	6712430.59394758	7142026.15196022
TCGA-25-2400-01A	12	686	0.809222027024367	590693.892267387	15572838.9779584	16163532.8702258
TCGA-25-2401-01A	8	278	-0.610413802744095	429595.558012645	7410523.37571812	7840118.93373077
TCGA-25-2404-01A	21	170	-0.937757015918862	966590.005528451	4027458.35636855	4994048.361897
TCGA-25-2408-01A	7	72	-1.32367743566174	375896.113261064	2631272.79282745	3007168.90608851
TCGA-25-2409-01A	15	201	-0.851614065083397	698092.781770548	4134857.24587171	4832950.02764225
TCGA-26-1438-01A	5	88	-0.485267155645968	268497.223757903	2792371.12708219	3060868.35084009
TCGA-26-1439-01A	9	153	0.288810825256408	483295.002764226	4510753.35913277	4994048.361897
TCGA-26-1440-01A	8	114	-0.159930033237723	429595.558012645	2953469.46133693	3383065.01934958
TCGA-26-1442-01A	2	122	-0.137492990313017	107398.889503161	4027458.35636855	4134857.24587171
TCGA-26-1443-01A	3	136	0.0307848316222825	107398.889503161	3866360.0221138	3973758.91161696
TCGA-26-1799-01A	5	117	-0.159930033237723	268497.223757903	3114567.79559168	3383065.01934958
TCGA-26-5132-01A	6	94	-0.406737505409495	322196.668509484	2738671.68233061	3060868.35084009
TCGA-26-5133-01A	13	154	0.344903432568174	698092.781770548	4295955.58012645	4994048.361897
TCGA-26-5134-01A	2	77	-0.642326456118914	107398.889503161	2416475.01382113	2523873.90332429
TCGA-26-5135-01A	2	104	-0.339426376635376	107398.889503161	3436764.46410116	3544163.35360432
TCGA-26-5136-01B	10	155	0.322466389643468	483295.002764226	4403354.46962961	4886649.47239384
TCGA-26-5139-01A	5	71	-0.675982020505974	268497.223757903	2040578.90056006	2309076.12431797
TCGA-26-6173-01A	5	116	-0.171148554700077	268497.223757903	3597862.7983559	3866360.0221138
TCGA-26-6174-01A	2	51	-0.9340080141401	107398.889503161	1825781.12155374	1933180.0110569
TCGA-26-A7UX-01B	4	137	0.0532218745469891	161098.334254742	4457053.91438119	4618152.24863593
TCGA-27-1830-01A	5	195	0.715114640825833	268497.223757903	6551332.25969283	6819829.48345074
TCGA-27-1831-01A	1	150	0.165407089170522	53699.4447515806	4564452.80388435	4618152.24863593
TCGA-27-1832-01A	5	154	0.255155260869348	268497.223757903	4832950.02764225	5101447.25140016
TCGA-27-1833-01A	8	122	-0.070181861538897	322196.668509484	3329365.574598	3651562.24310748
TCGA-27-1834-01A	9	151	0.266373782331701	483295.002764226	4779250.58289067	5262545.5856549
TCGA-27-1835-01A	6	197	0.748770205212893	322196.668509484	7249425.04146338	7571621.70997287
TCGA-27-1836-01A	1	208	0.816081333987012	53699.4447515806	7034627.26245706	7088326.70720864
TCGA-27-1837-01A	3	114	-0.21602264054949	161098.334254742	4081157.80112013	4242256.13537487
TCGA-27-1838-01A	6	244	1.2760407139435	268497.223757903	6497632.81494125	6766130.03869916
TCGA-27-2518-01A	4	125	-0.0814003830012503	214797.779006322	4725551.13813909	4940348.91714542
TCGA-27-2519-01A	10	90	-0.406737505409495	536994.447515806	3383065.01934958	3920059.46686538
TCGA-27-2521-01A	6	213	0.928266548610545	268497.223757903	7034627.26245706	7303124.48621496
TCGA-27-2523-01A	5	92	-0.440393069796555	268497.223757903	3275666.12984642	3544163.35360432
TCGA-27-2524-01A	10	151	0.277592303794055	536994.447515806	4457053.91438119	4994048.361897
TCGA-27-2526-01A	6	152	0.243936739406995	268497.223757903	5101447.25140016	5369944.47515806
TCGA-27-2527-01A	6	133	0.0307848316222825	322196.668509484	5799540.03317071	6121736.70168019
TCGA-27-2528-01A	4	164	0.356121954030528	214797.779006322	5423643.91990964	5638441.69891596
TCGA-28-1745-01B	0	31	-1.18081548631187	0	1127688.33978319	1127688.33978319
TCGA-28-1746-01A	8	94	-0.384300462484789	268497.223757903	3007168.90608851	3275666.12984642
TCGA-28-1747-01C	2	134	-0.00287073276477735	107398.889503161	4618152.24863593	4725551.13813909
TCGA-28-1749-01A	7	109	-0.227241162011843	375896.113261064	3383065.01934958	3758961.13261064
TCGA-28-1750-01A	10	139	0.142970046245815	483295.002764226	3920059.46686538	4403354.46962961
TCGA-28-1751-01A	6	73	-0.642326456118914	322196.668509484	2684972.23757903	3007168.90608851
TCGA-28-1752-01A	6	109	-0.238459683474196	322196.668509484	3007168.90608851	3329365.574598
TCGA-28-1753-01A	2	160	0.288810825256408	107398.889503161	5584742.25416438	5692141.14366754
TCGA-28-1755-01A	7	61	-0.765730192204801	268497.223757903	1986879.45580848	2255376.67956639
TCGA-28-1756-01C	4	132	-0.00287073276477735	214797.779006322	4671851.69338751	4886649.47239384
TCGA-28-1757-01A	4	176	0.490744211578767	161098.334254742	5316245.03040648	5477343.36466122
TCGA-28-1760-01A	8	162	0.378558996955234	429595.558012645	5477343.36466122	5906938.92267387
TCGA-28-2502-01B	4	115	-0.193585597624783	214797.779006322	4671851.69338751	4886649.47239384
TCGA-28-2506-01A	12	140	0.176625610632875	644393.337018967	4940348.91714542	5584742.25416438
TCGA-28-2509-01A	16	63	-0.642326456118914	805491.671273709	2255376.67956639	3060868.35084009
TCGA-28-2513-01A	7	83	-0.518922720033028	375896.113261064	2684972.23757903	3060868.35084009
TCGA-28-2514-01A	3	174	0.457088647191707	161098.334254742	5208846.14090332	5369944.47515806
TCGA-28-5204-01A	9	209	0.917048027148192	429595.558012645	6712430.59394758	7142026.15196022
TCGA-28-5207-01A	6	165	0.389777518417588	268497.223757903	5423643.91990964	5692141.14366754
TCGA-28-5208-01A	3	107	-0.294552290785963	161098.334254742	2631272.79282745	2792371.12708219
TCGA-28-5209-01A	7	123	-0.070181861538897	268497.223757903	3544163.35360432	3866360.0221138
TCGA-28-5211-01C	3	70	-0.709637584893034	161098.334254742	2738671.68233061	2899770.01658535
TCGA-28-5213-01A	8	85	-0.485267155645968	429595.558012645	3651562.24310748	4081157.80112013
TCGA-28-5214-01A	5	103	-0.316989333710669	268497.223757903	3275666.12984642	3544163.35360432
TCGA-28-5215-01A	11	71	-0.608670891731855	536994.447515806	1879480.56630532	2416475.01382113
TCGA-28-5216-01A	9	158	0.344903432568174	483295.002764226	4671851.69338751	5155146.69615174
TCGA-28-5218-01A	9	48	-0.889133928290687	268497.223757903	1235087.22928635	1503584.45304426
TCGA-28-5219-01A	9	105	-0.24967820493655	429595.558012645	2846070.57183377	3275666.12984642
TCGA-28-5220-01A	6	128	-0.0253077756894839	268497.223757903	4134857.24587171	4403354.46962961
TCGA-28-6450-01A	5	178	0.524399775965827	268497.223757903	5531042.8094128	5799540.03317071
TCGA-29-1688-01A	10	369	-0.289962025636166	483295.002764226	8538211.71550132	9021506.71826554
TCGA-29-1690-01A	4	55	-1.39259179633012	214797.779006322	1986879.45580848	2201677.2348148
TCGA-29-1691-01A	5	613	0.533564584350879	214797.779006322	14498850.0829268	14713647.8619331
TCGA-29-1692-01B	1	2060	5.50573570657391	53699.4447515806	66963207.605221	67016907.0499726
TCGA-29-1693-01A	14	483	0.116632702307229	536994.447515806	11760178.4005962	12297172.848112
TCGA-29-1694-01A	16	312	-0.465693645340514	859191.11602529	7142026.15196022	8001217.26798551
TCGA-29-1695-01A	19	582	0.474987377782763	859191.11602529	14928445.6409394	15787636.7569647
TCGA-29-1696-01A	10	227	-0.779253986381606	483295.002764226	5047747.80664858	5531042.8094128
TCGA-29-1697-01A	29	310	-0.42779074697291	1503584.45304426	7786419.48897919	9290003.94202345
TCGA-29-1698-01A	14	592	0.492215967949856	536994.447515806	15733937.3122131	16270931.7597289
TCGA-29-1699-01A	8	494	0.133861292474322	375896.113261064	12028675.6243541	12404571.7376151
TCGA-29-1701-01A	9	614	0.550793174517972	483295.002764226	15035844.5304426	15519139.5332068
TCGA-29-1702-01A	10	1191	2.54241819783392	429595.558012645	30554984.0636494	30984579.621662
TCGA-29-1703-01A	16	567	0.412964453181228	805491.671273709	11062085.6188256	11867577.2900993
TCGA-29-1704-01B	7	550	0.323375784312344	375896.113261064	13102664.5193857	13478560.6326467
TCGA-29-1705-01A	9	382	-0.248613409235143	483295.002764226	8699310.04975606	9182605.05252028
TCGA-29-1707-01A	17	434	-0.0418703272300268	698092.781770548	9182605.05252028	9880697.83429083
TCGA-29-1710-01A	11	263	-0.651762419145118	536994.447515806	6443933.37018967	6980927.81770548
TCGA-29-1711-01A	8	532	0.264798577744228	375896.113261064	11276883.3978319	11652779.511093
TCGA-29-1761-01A	5	961	1.73267445998055	268497.223757903	26312727.9282745	26581225.1520324
TCGA-29-1762-01A	30	299	-0.462247927307096	1503584.45304426	7195725.5967118	8699310.04975606
TCGA-29-1763-01A	18	403	-0.145241868232585	912890.56077687	9182605.05252028	10095495.6132972
TCGA-29-1764-01A	15	251	-0.679328163412467	698092.781770548	5423643.91990964	6121736.70168019
TCGA-29-1766-01A	15	385	-0.217601946934375	590693.892267387	9397402.83152661	9988096.72379399
TCGA-29-1768-01A	13	153	-1.02389996675433	644393.337018967	3436764.46410116	4081157.80112013
TCGA-29-1769-01A	9	476	0.0752840859062055	483295.002764226	11223183.9530803	11706478.9558446
TCGA-29-1770-01A	21	330	-0.386442130571886	966590.005528451	7303124.48621496	8269714.49174341
TCGA-29-1771-01A	5	170	-0.992888504453559	268497.223757903	5369944.47515806	5638441.69891596
TCGA-29-1774-01A	13	298	-0.52427085190863	536994.447515806	7732720.04422761	8269714.49174341
TCGA-29-1775-01A	11	612	0.550793174517972	536994.447515806	12726768.4061246	13263762.8536404
TCGA-29-1776-01A	11	230	-0.765471114247932	483295.002764226	3866360.0221138	4349655.02487803
TCGA-29-1777-01A	14	431	-0.0625446354305384	751792.226522129	10417692.2818066	11169484.5083288
TCGA-29-1778-01A	9	760	1.05386800739709	322196.668509484	19707696.2238301	20029892.8923396
TCGA-29-1781-01A	14	667	0.75064482045625	751792.226522129	16485729.5387352	17237521.7652574
TCGA-29-1783-01A	18	378	-0.23138481906805	859191.11602529	9075206.16301712	9934397.27904241
TCGA-29-1784-01A	12	435	-0.0556531993637012	483295.002764226	9826998.38953925	10310293.3923035
TCGA-29-1785-01A	7	333	-0.424345028939491	322196.668509484	9182605.05252028	9504801.72102977
TCGA-29-2414-01A	16	437	-0.0349788911631896	644393.337018967	9719599.50003609	10363992.8370551
TCGA-29-2425-01A	12	366	-0.293407743669584	590693.892267387	8591911.1602529	9182605.05252028
TCGA-29-2427-01A	11	168	-0.979105632319885	590693.892267387	4779250.58289067	5369944.47515806
TCGA-29-2428-01A	24	292	-0.507042261741537	1288786.67403793	7195725.5967118	8484512.27074974
TCGA-29-2429-01A	0	792	1.13311952216571	0	28084809.6050767	28138509.0498282
TCGA-29-2431-01A	9	757	1.04353085329683	429595.558012645	19170701.7763143	19600297.3343269
TCGA-29-2432-01A	15	274	-0.600076648643839	751792.226522129	6551332.25969283	7303124.48621496
TCGA-29-2434-01A	5	885	1.47079988944074	214797.779006322	20620586.784607	20835384.5636133
TCGA-29-2436-01A	5	91	-1.26510022909363	268497.223757903	3060868.35084009	3329365.574598
TCGA-29-A5NZ-01A	12	344	-0.369213540404793	536994.447515806	10471391.7265582	11008386.174074
TCGA-2A-A8VL-01A	0	59	-0.340449036675276	0	2255376.67956639	2255376.67956639
TCGA-2A-A8VO-01A	0	42	-0.521357724307127	0	1772081.67680216	1772081.67680216
TCGA-2A-A8VT-01A	8	84	0.0107266510806723	375896.113261064	2792371.12708219	3168267.24034326
TCGA-2A-A8VV-01A	0	37	-0.574566161845907	0	1664682.787299	1664682.787299
TCGA-2A-A8VX-01A	1	127	0.393827401359888	53699.4447515806	4886649.47239384	4940348.91714542
TCGA-2A-A8W1-01A	2	148	0.62794452653052	53699.4447515806	4940348.91714542	4994048.361897
TCGA-2A-A8W3-01A	2	77	-0.127615286520156	107398.889503161	2899770.01658535	3007168.90608851
TCGA-2A-AAYF-01A	0	43	-0.510716036799371	0	1557283.89779584	1557283.89779584
TCGA-2A-AAYO-01A	1	28	-0.659699661907955	53699.4447515806	1181387.78453477	1235087.22928635
TCGA-2A-AAYU-01A	1	84	-0.0637651614736197	53699.4447515806	3275666.12984642	3329365.574598
TCGA-2E-A9G8-01A	6	453	1.50953611478083	268497.223757903	10417692.2818066	10686189.5055645
TCGA-2F-A9KO-01A	6	193	-0.0712097480458301	322196.668509484	6605031.70444442	6927228.3729539
TCGA-2F-A9KP-01A	7	361	0.890245526322087	375896.113261064	11921276.7348509	12297172.848112
TCGA-2F-A9KQ-01A	9	67	-0.770967137082835	375896.113261064	1610983.34254742	1986879.45580848
TCGA-2F-A9KR-01A	20	150	-0.236193197493579	1073988.89503161	3866360.0221138	4940348.91714542
TCGA-2F-A9KT-01A	4	233	0.144975461575358	214797.779006322	7142026.15196022	7356823.93096654
TCGA-2F-A9KW-01A	3	449	1.36812862127419	161098.334254742	13263762.8536404	13478560.6326467
TCGA-2G-AAEW-01A	5	35	-1.13492164282913	268497.223757903	1181387.78453477	1449885.00829268
TCGA-2G-AAEX-01A	12	87	-0.253363355952668	536994.447515806	2362775.56906955	2899770.01658535
TCGA-2G-AAF1-01A	0	28	-1.31422163338028	0	1235087.22928635	1235087.22928635
TCGA-2G-AAF4-01A	11	114	0.135119956908147	590693.892267387	3329365.574598	3920059.46686538
TCGA-2G-AAF6-01A	19	120	0.344303279217817	1020289.45028003	2953469.46133693	3973758.91161696
TCGA-2G-AAF8-01A	10	178	1.07644490730166	536994.447515806	3920059.46686538	4457053.91438119
TCGA-2G-AAFE-01A	11	78	-0.402780014745289	536994.447515806	2362775.56906955	2899770.01658535
TCGA-2G-AAFG-01A	19	87	-0.148771694797833	912890.56077687	2255376.67956639	3168267.24034326
TCGA-2G-AAFG-05A	4	65	-0.701613332330531	161098.334254742	2147977.79006322	2309076.12431797
TCGA-2G-AAFH-01A	16	194	1.40516155664543	805491.671273709	4725551.13813909	5531042.8094128
TCGA-2G-AAFI-01A	17	178	1.18103656845649	805491.671273709	4725551.13813909	5531042.8094128
TCGA-2G-AAFJ-01A	21	116	0.314419947459293	1020289.45028003	3168267.24034326	4188556.69062329
TCGA-2G-AAFL-01A	2	43	-1.06021331343282	107398.889503161	1718382.23205058	1825781.12155374
TCGA-2G-AAFM-01A	7	71	-0.567138339417172	322196.668509484	2255376.67956639	2577573.34807587
TCGA-2G-AAFN-01A	19	124	0.404069942734865	859191.11602529	4349655.02487803	5208846.14090332
TCGA-2G-AAFO-01A	2	45	-1.0303299816743	53699.4447515806	1557283.89779584	1610983.34254742
TCGA-2G-AAFV-01A	11	88	-0.253363355952668	483295.002764226	2523873.90332429	3007168.90608851
TCGA-2G-AAFY-01A	3	33	-1.19468830634618	107398.889503161	1396185.5635411	1503584.45304426
TCGA-2G-AAFZ-01A	16	150	0.747728257957894	805491.671273709	3490463.90885274	4295955.58012645
TCGA-2G-AAG0-01A	11	173	1.01667824378461	536994.447515806	5638441.69891596	6175436.14643177
TCGA-2G-AAG3-01A	13	78	-0.372896682986764	483295.002764226	2040578.90056006	2523873.90332429
TCGA-2G-AAG5-01A	9	55	-0.776321661726841	429595.558012645	1342486.11878952	1772081.67680216
TCGA-2G-AAG6-01A	31	117	0.478778272131176	1503584.45304426	2792371.12708219	4295955.58012645
TCGA-2G-AAG7-01A	19	173	1.13621157081871	912890.56077687	4618152.24863593	5531042.8094128
TCGA-2G-AAG8-01A	9	75	-0.477488344141599	429595.558012645	2255376.67956639	2684972.23757903
TCGA-2G-AAG9-01A	23	112	0.284536615700768	1127688.33978319	2953469.46133693	4081157.80112013
TCGA-2G-AAGA-01A	16	107	0.105236625149623	805491.671273709	2953469.46133693	3758961.13261064
TCGA-2G-AAGC-01A	14	79	-0.34301335122824	644393.337018967	2684972.23757903	3329365.574598
TCGA-2G-AAGE-01A	16	150	0.747728257957894	751792.226522129	3490463.90885274	4242256.13537487
TCGA-2G-AAGF-01A	17	126	0.404069942734865	751792.226522129	3812660.57736222	4618152.24863593
TCGA-2G-AAGG-01A	17	132	0.493719938010438	912890.56077687	3812660.57736222	4725551.13813909
TCGA-2G-AAGI-01A	30	109	0.344303279217817	1449885.00829268	2631272.79282745	4081157.80112013
TCGA-2G-AAGI-05A	13	57	-0.686671666451269	698092.781770548	1825781.12155374	2523873.90332429
TCGA-2G-AAGJ-01A	15	150	0.732786592078632	698092.781770548	4188556.69062329	4886649.47239384
TCGA-2G-AAGK-01A	20	87	-0.133830028918571	912890.56077687	2309076.12431797	3221966.68509484
TCGA-2G-AAGM-01A	13	100	-0.0441800336429981	590693.892267387	3920059.46686538	4510753.35913277
TCGA-2G-AAGN-01A	20	76	-0.298188353590454	966590.005528451	2040578.90056006	3007168.90608851
TCGA-2G-AAGO-01A	15	179	1.16609490257723	698092.781770548	4134857.24587171	4832950.02764225
TCGA-2G-AAGP-01A	6	31	-1.17974664046692	268497.223757903	859191.11602529	1127688.33978319
TCGA-2G-AAGS-01A	19	84	-0.193596692435619	859191.11602529	2255376.67956639	3114567.79559168
TCGA-2G-AAGT-01A	17	167	1.01667824378461	751792.226522129	5047747.80664858	5799540.03317071
TCGA-2G-AAGV-01A	18	44	-0.806204993485366	859191.11602529	1396185.5635411	2255376.67956639
TCGA-2G-AAGW-01A	17	277	2.66026149050344	751792.226522129	7679020.59947603	8430812.82599816
TCGA-2G-AAGX-01A	15	62	-0.582080005296434	698092.781770548	1718382.23205058	2416475.01382113
TCGA-2G-AAGY-01A	14	91	-0.163713360677095	644393.337018967	2147977.79006322	2792371.12708219
TCGA-2G-AAGY-05A	17	104	0.0753532933910988	859191.11602529	2523873.90332429	3383065.01934958
TCGA-2G-AAGZ-01A	3	27	-1.28433830162175	107398.889503161	966590.005528451	1073988.89503161
TCGA-2G-AAH0-01A	12	96	-0.118888363039309	590693.892267387	3007168.90608851	3597862.7983559
TCGA-2G-AAH2-01A	20	97	0.0155866298740504	859191.11602529	2631272.79282745	3490463.90885274
TCGA-2G-AAH3-01A	17	57	-0.62690500293422	912890.56077687	1772081.67680216	2684972.23757903
TCGA-2G-AAH4-01A	19	169	1.07644490730166	912890.56077687	4671851.69338751	5584742.25416438
TCGA-2G-AAH8-01A	19	106	0.135119956908147	912890.56077687	3275666.12984642	4188556.69062329
TCGA-2G-AAHA-01A	3	35	-1.16480497458766	161098.334254742	1288786.67403793	1449885.00829268
TCGA-2G-AAHC-01A	6	57	-0.791263327606104	322196.668509484	1825781.12155374	2147977.79006322
TCGA-2G-AAHG-01A	17	65	-0.507371675900123	859191.11602529	1718382.23205058	2577573.34807587
TCGA-2G-AAHL-01A	17	60	-0.582080005296434	912890.56077687	1879480.56630532	2792371.12708219
TCGA-2G-AAHN-01A	6	33	-1.14986330870839	322196.668509484	1127688.33978319	1449885.00829268
TCGA-2G-AAHP-01A	21	80	-0.223480024194143	1020289.45028003	2255376.67956639	3275666.12984642
TCGA-2G-AAHP-05A	8	108	0.000644963994788262	429595.558012645	3383065.01934958	3812660.57736222
TCGA-2G-AAHT-01A	16	96	-0.0591216995222602	751792.226522129	2631272.79282745	3383065.01934958
TCGA-2G-AAKD-01A	20	119	0.344303279217817	966590.005528451	3758961.13261064	4725551.13813909
TCGA-2G-AAKG-01A	17	68	-0.462546678262337	859191.11602529	2255376.67956639	3114567.79559168
TCGA-2G-AAKG-05A	11	110	0.0753532933910988	590693.892267387	3007168.90608851	3597862.7983559
TCGA-2G-AAKH-01A	4	174	0.927028248509039	214797.779006322	4349655.02487803	4564452.80388435
TCGA-2G-AAKL-01A	15	231	1.94306152829886	751792.226522129	6980927.81770548	7732720.04422761
TCGA-2G-AAKM-01A	16	131	0.463836606251914	751792.226522129	3920059.46686538	4671851.69338751
TCGA-2G-AAL5-01A	18	88	-0.148771694797833	859191.11602529	2470174.45857271	3329365.574598
TCGA-2G-AAL7-01A	12	61	-0.641846668813482	590693.892267387	1235087.22928635	1825781.12155374
TCGA-2G-AALP-01A	25	136	0.673019928561583	1181387.78453477	3705261.68785906	4886649.47239384
TCGA-2H-A9GF-01A	12	528	1.86130196808812	590693.892267387	14821046.7514362	15411740.6437036
TCGA-2H-A9GH-01A	9	255	0.014726353260968	483295.002764226	7142026.15196022	7625321.15472445
TCGA-2H-A9GI-01A	14	263	0.10170274091587	590693.892267387	6873528.92820232	7464222.82046971
TCGA-2H-A9GJ-01A	6	330	0.496441731041964	322196.668509484	9021506.71826554	9343703.38677503
TCGA-2H-A9GK-01A	7	162	-0.620870325755624	375896.113261064	4671851.69338751	5047747.80664858
TCGA-2H-A9GL-01A	14	239	-0.0588690516777953	590693.892267387	6282835.03593493	6873528.92820232
TCGA-2H-A9GM-01A	11	482	1.54684887425886	536994.447515806	12404571.7376151	12941566.1851309
TCGA-2H-A9GN-01A	12	549	2.00180228660758	644393.337018967	17130122.8757542	17774516.2127732
TCGA-2H-A9GO-01A	6	321	0.43622730881934	322196.668509484	9988096.72379399	10310293.3923035
TCGA-2H-A9GQ-01A	6	603	2.32294587179491	322196.668509484	17183822.3205058	17506018.9890153
TCGA-2H-A9GR-01A	6	253	-0.0187261035293789	322196.668509484	8269714.49174341	8591911.1602529
TCGA-2J-AAB1-01A	1	46	-0.536463476437735	53699.4447515806	1557283.89779584	1610983.34254742
TCGA-2J-AAB4-01A	9	56	-0.223045407296479	429595.558012645	1610983.34254742	2040578.90056006
TCGA-2J-AAB6-01A	13	117	0.908742064602499	698092.781770548	2953469.46133693	3651562.24310748
TCGA-2J-AAB8-01A	3	61	-0.240457522248771	161098.334254742	2416475.01382113	2577573.34807587
TCGA-2J-AAB9-01A	0	34	-0.76282097081753	0	1557283.89779584	1557283.89779584
TCGA-2J-AABA-01A	2	44	-0.553875591390027	107398.889503161	1342486.11878952	1449885.00829268
TCGA-2J-AABE-01A	8	51	-0.327518097010231	429595.558012645	1879480.56630532	2309076.12431797
TCGA-2J-AABF-01A	4	67	-0.118572717582727	214797.779006322	2309076.12431797	2523873.90332429
TCGA-2J-AABH-01A	13	103	0.664972455270411	698092.781770548	2899770.01658535	3597862.7983559
TCGA-2J-AABI-01A	17	113	0.908742064602499	805491.671273709	3275666.12984642	4081157.80112013
TCGA-2J-AABK-01A	0	41	-0.640936166151487	0	1718382.23205058	1718382.23205058
TCGA-2J-AABO-01A	6	126	0.943566294507083	322196.668509484	3544163.35360432	3866360.0221138
TCGA-2J-AABP-01A	10	398	5.74931002133967	536994.447515806	12082375.0691056	12619369.5166214
TCGA-2J-AABR-01A	0	44	-0.588699821294611	0	1879480.56630532	1879480.56630532
TCGA-2J-AABT-01A	1	71	-0.101160602630435	53699.4447515806	2738671.68233061	2792371.12708219
TCGA-2J-AABU-01A	12	106	0.699796685174995	644393.337018967	2738671.68233061	3383065.01934958
TCGA-2J-AABV-01A	0	40	-0.658348281103779	0	1610983.34254742	1610983.34254742
TCGA-2K-A9WE-01A	1	15	-0.822421393763844	53699.4447515806	590693.892267387	644393.337018967
TCGA-2L-AAQA-01A	6	81	0.160021121653944	322196.668509484	2846070.57183377	3168267.24034326
TCGA-2L-AAQE-01A	9	88	0.334142271176864	483295.002764226	3060868.35084009	3544163.35360432
TCGA-2L-AAQI-01A	0	54	-0.414578671771691	0	2309076.12431797	2309076.12431797
TCGA-2L-AAQJ-01A	5	113	0.699796685174995	268497.223757903	3329365.574598	3597862.7983559
TCGA-2L-AAQL-01A	9	77	0.142609006701652	483295.002764226	2577573.34807587	3060868.35084009
TCGA-2L-AAQM-01A	29	157	1.88382050193085	1557283.89779584	4081157.80112013	5638441.69891596
TCGA-2V-A95S-01A	8	54	-0.667862894129789	375896.113261064	1664682.787299	2040578.90056006
TCGA-2W-A8YY-01A	1	30	-1.10475898297457	53699.4447515806	1181387.78453477	1235087.22928635
TCGA-2X-A9D5-01A	15	33	-1.01538831579504	805491.671273709	1342486.11878952	2147977.79006322
TCGA-2X-A9D6-01A	5	43	-1.01538831579504	268497.223757903	1610983.34254742	1879480.56630532
TCGA-2Y-A9GS-01A	11	77	-0.413192659949123	590693.892267387	2255376.67956639	2846070.57183377
TCGA-2Y-A9GT-01A	3	40	-0.853968065261814	53699.4447515806	1503584.45304426	1557283.89779584
TCGA-2Y-A9GU-01A	9	152	0.301842997558131	375896.113261064	3705261.68785906	4081157.80112013
TCGA-2Y-A9GV-01A	2	61	-0.65806788512284	107398.889503161	1664682.787299	1772081.67680216
TCGA-2Y-A9GW-01A	8	50	-0.707042930157584	214797.779006322	1557283.89779584	1772081.67680216
TCGA-2Y-A9GX-01A	1	32	-0.951918155331301	53699.4447515806	1288786.67403793	1342486.11878952
TCGA-2Y-A9GY-01A	9	219	0.958108601023693	483295.002764226	6175436.14643177	6658731.149196
TCGA-2Y-A9GZ-01A	11	197	0.762208420884719	590693.892267387	5477343.36466122	6068037.25692861
TCGA-2Y-A9H0-01A	5	264	1.35970397030859	214797.779006322	8162315.60224025	8377113.38124658
TCGA-2Y-A9H1-01A	4	128	0.0177877363566188	214797.779006322	3329365.574598	3544163.35360432
TCGA-2Y-A9H2-01A	23	145	0.370408060606772	1127688.33978319	4027458.35636855	5155146.69615174
TCGA-2Y-A9H3-01A	5	179	0.52712820471795	268497.223757903	4618152.24863593	4886649.47239384
TCGA-2Y-A9H4-01A	8	78	-0.432782677963021	322196.668509484	2362775.56906955	2684972.23757903
TCGA-2Y-A9H5-01A	12	61	-0.560117795053354	644393.337018967	2040578.90056006	2684972.23757903
TCGA-2Y-A9H6-01A	4	170	0.429178114648464	214797.779006322	5745840.58841913	5960638.36742545
TCGA-2Y-A9H7-01A	6	53	-0.697247921150635	322196.668509484	2309076.12431797	2631272.79282745
TCGA-2Y-A9H8-01A	22	162	0.52712820471795	1073988.89503161	4510753.35913277	5584742.25416438
TCGA-2Y-A9H9-01A	4	285	1.55560415044756	214797.779006322	9236304.49727187	9451102.27627819
TCGA-2Y-A9HA-01A	10	240	1.17359879917656	483295.002764226	6873528.92820232	7356823.93096654
TCGA-2Y-A9HB-01A	6	45	-0.775607993206225	268497.223757903	1664682.787299	1933180.0110569
TCGA-2Z-A9J1-01A	9	56	-0.00534749280710606	483295.002764226	1664682.787299	2147977.79006322
TCGA-2Z-A9J2-01A	8	58	0.0113274847634396	322196.668509484	2040578.90056006	2362775.56906955
TCGA-2Z-A9J3-01A	16	77	0.461551879168173	483295.002764226	2309076.12431797	2792371.12708219
TCGA-2Z-A9J5-01A	9	37	-0.322172066647474	483295.002764226	1235087.22928635	1718382.23205058
TCGA-2Z-A9J6-01A	9	48	-0.138747313371471	483295.002764226	1557283.89779584	2040578.90056006
TCGA-2Z-A9J7-01A	8	39	-0.305497089076928	268497.223757903	1235087.22928635	1503584.45304426
TCGA-2Z-A9J8-01A	2	41	-0.372196999359111	107398.889503161	1396185.5635411	1503584.45304426
TCGA-2Z-A9J9-01A	0	37	-0.472246864782385	0	1342486.11878952	1342486.11878952
TCGA-2Z-A9JD-01A	4	30	-0.522271797494022	214797.779006322	1020289.45028003	1235087.22928635
TCGA-2Z-A9JE-01A	5	42	-0.305497089076928	214797.779006322	1342486.11878952	1557283.89779584
TCGA-2Z-A9JG-01A	21	49	0.0780273950456223	966590.005528451	1664682.787299	2631272.79282745
TCGA-2Z-A9JI-01A	2	61	-0.0386974479481974	107398.889503161	2255376.67956639	2362775.56906955
TCGA-2Z-A9JJ-01A	4	64	0.0446774399045309	214797.779006322	2201677.2348148	2416475.01382113
TCGA-2Z-A9JK-01A	3	36	-0.438896909641293	161098.334254742	1235087.22928635	1396185.5635411
TCGA-2Z-A9JL-01A	1	72	0.128052327757259	53699.4447515806	2147977.79006322	2201677.2348148
TCGA-2Z-A9JM-01A	8	41	-0.272147133935837	375896.113261064	1181387.78453477	1557283.89779584
TCGA-2Z-A9JN-01A	0	34	-0.522271797494022	0	1342486.11878952	1342486.11878952
TCGA-2Z-A9JO-01A	0	13	-0.872446326475481	0	322196.668509484	322196.668509484
TCGA-2Z-A9JP-01A	8	33	-0.405546954500202	429595.558012645	1127688.33978319	1557283.89779584
TCGA-2Z-A9JQ-01A	7	50	-0.138747313371471	268497.223757903	1288786.67403793	1557283.89779584
TCGA-2Z-A9JR-01A	8	42	-0.255472156365291	322196.668509484	1235087.22928635	1557283.89779584
TCGA-2Z-A9JS-01A	8	51	-0.10539735823038	429595.558012645	1503584.45304426	1933180.0110569
TCGA-2Z-A9JT-01A	9	35	-0.355522021788565	483295.002764226	1235087.22928635	1718382.23205058
TCGA-30-1714-01A	18	548	0.354387246613112	912890.56077687	14230352.8591689	15143243.4199457
TCGA-30-1718-01A	3	633	0.595587508952414	161098.334254742	16754226.7624932	16915325.0967479
TCGA-30-1853-01A	30	449	0.0546097777056939	1396185.5635411	9773298.94478767	11169484.5083288
TCGA-30-1855-01A	8	486	0.106295548206973	429595.558012645	11974976.1796025	12404571.7376151
TCGA-30-1856-01A	11	643	0.657610433553948	590693.892267387	20029892.8923396	20620586.784607
TCGA-30-1857-01A	12	291	-0.551836596175979	590693.892267387	6873528.92820232	7464222.82046971
TCGA-30-1859-01A	23	260	-0.620750956844351	1020289.45028003	6014337.81217703	7034627.26245706
TCGA-30-1860-01A	17	705	0.891919259826413	912890.56077687	14015555.0801625	14928445.6409394
TCGA-30-1861-01A	12	669	0.75064482045625	590693.892267387	15196942.8646973	15787636.7569647
TCGA-30-1862-01A	14	447	-0.00741314689584081	698092.781770548	10900987.2845709	11599080.0663414
TCGA-30-1866-01A	11	572	0.412964453181228	590693.892267387	14928445.6409394	15519139.5332068
TCGA-30-1867-01A	4	416	-0.148687586266003	214797.779006322	9934397.27904241	10149195.0580487
TCGA-30-1880-01A	25	401	-0.128013278065492	1288786.67403793	10256593.9475519	11545380.6215898
TCGA-30-1887-01A	21	222	-0.758579678181095	912890.56077687	6068037.25692861	6980927.81770548
TCGA-30-1891-01A	14	653	0.70240476798839	698092.781770548	14122953.9696657	14874746.1961878
TCGA-30-1892-01A	14	175	-0.944648451985699	698092.781770548	4349655.02487803	5047747.80664858
TCGA-31-1944-01A	14	401	-0.165916176433096	590693.892267387	9826998.38953925	10417692.2818066
TCGA-31-1946-01A	7	360	-0.331310642037189	322196.668509484	9504801.72102977	9826998.38953925
TCGA-31-1950-01A	15	293	-0.534608006008886	805491.671273709	8484512.27074974	9290003.94202345
TCGA-31-1951-01A	10	516	0.216558525276368	375896.113261064	11276883.3978319	11652779.511093
TCGA-31-1953-01A	2	722	0.89881069589325	107398.889503161	21479777.9006322	21587176.7901354
TCGA-31-1955-01A	23	236	-0.703448189646397	1020289.45028003	4081157.80112013	5101447.25140016
TCGA-31-1956-01A	14	176	-0.94120273395228	590693.892267387	4403354.46962961	4994048.361897
TCGA-31-1959-01A	21	506	0.220004243309787	1127688.33978319	11813877.8453477	12941566.1851309
TCGA-32-1970-01A	4	268	1.52284818611527	214797.779006322	7303124.48621496	7517922.26522129
TCGA-32-1973-01A	5	249	1.32091479979291	214797.779006322	8054916.71273709	8269714.49174341
TCGA-32-1976-01A	6	183	0.591710904739947	322196.668509484	5584742.25416438	5906938.92267387
TCGA-32-1977-01A	6	105	-0.283333769323609	268497.223757903	3275666.12984642	3544163.35360432
TCGA-32-1978-01A	11	256	1.4667555788035	483295.002764226	7142026.15196022	7625321.15472445
TCGA-32-1979-01A	5	55	-0.855478363903627	268497.223757903	1879480.56630532	2147977.79006322
TCGA-32-1980-01A	0	66	-0.788167235129507	0	2792371.12708219	2792371.12708219
TCGA-32-1982-01A	5	93	-0.429174548334202	268497.223757903	2738671.68233061	3007168.90608851
TCGA-32-1986-01A	5	168	0.412214561342294	214797.779006322	6390233.92543809	6605031.70444442
TCGA-32-1987-01A	9	110	-0.193585597624783	483295.002764226	4779250.58289067	5262545.5856549
TCGA-32-1991-01A	2	162	0.311247868181115	107398.889503161	5477343.36466122	5584742.25416438
TCGA-32-2491-01A	8	158	0.333684911105821	429595.558012645	4618152.24863593	5047747.80664858
TCGA-32-2494-01A	6	107	-0.260896726398903	322196.668509484	3973758.91161696	4295955.58012645
TCGA-32-2495-01A	11	121	-0.0477448186141905	590693.892267387	3920059.46686538	4510753.35913277
TCGA-32-2615-01A	13	192	0.771207248137599	698092.781770548	4779250.58289067	5477343.36466122
TCGA-32-2616-01A	6	122	-0.0926189044636036	214797.779006322	3114567.79559168	3329365.574598
TCGA-32-2632-01A	7	209	0.894610984223485	322196.668509484	5692141.14366754	6068037.25692861
TCGA-32-2634-01A	10	113	-0.14871151177537	483295.002764226	3651562.24310748	4134857.24587171
TCGA-32-2638-01A	8	171	0.479525690116414	268497.223757903	4994048.361897	5262545.5856549
TCGA-32-4208-01A	5	314	2.05011869484587	268497.223757903	7625321.15472445	7893818.37848235
TCGA-32-4209-01A	8	229	1.1301999349329	429595.558012645	7195725.5967118	7625321.15472445
TCGA-32-4210-01A	18	242	1.38822592856703	859191.11602529	5799540.03317071	6658731.149196
TCGA-32-4211-01A	7	167	0.423433082804647	322196.668509484	5047747.80664858	5369944.47515806
TCGA-32-4213-01A	3	87	-0.518922720033028	161098.334254742	2792371.12708219	2953469.46133693
TCGA-32-4719-01A	2	143	0.0980959603964022	107398.889503161	4725551.13813909	4832950.02764225
TCGA-32-5222-01A	10	118	-0.0926189044636036	536994.447515806	3544163.35360432	4081157.80112013
TCGA-33-4532-01A	11	452	1.1651454085934	483295.002764226	9236304.49727187	9719599.50003609
TCGA-33-4533-01A	15	167	-0.283884502774784	644393.337018967	3114567.79559168	3758961.13261064
TCGA-33-4538-01A	19	213	-0.0260499989726166	1020289.45028003	5477343.36466122	6497632.81494125
TCGA-33-4547-01A	14	155	-0.350921473763347	751792.226522129	4134857.24587171	4886649.47239384
TCGA-33-4566-01A	9	174	-0.278727812698741	375896.113261064	5047747.80664858	5423643.91990964
TCGA-33-4582-01A	7	276	0.236941194905594	322196.668509484	8054916.71273709	8377113.38124658
TCGA-33-4583-01A	11	123	-0.531405626424865	590693.892267387	4457053.91438119	5047747.80664858
TCGA-33-4586-01A	16	209	-0.06214682950492	859191.11602529	5531042.8094128	6390233.92543809
TCGA-33-4587-01A	22	233	0.0925538727763804	1020289.45028003	6121736.70168019	7142026.15196022
TCGA-33-4589-01A	5	64	-0.866590481367682	268497.223757903	2094278.34531164	2362775.56906955
TCGA-33-6737-01A	17	230	0.0513003521680336	859191.11602529	6712430.59394758	7571621.70997287
TCGA-33-6738-01A	16	148	-0.376704924143564	859191.11602529	4349655.02487803	5208846.14090332
TCGA-33-A4WN-01A	12	169	-0.289041192850827	536994.447515806	4618152.24863593	5155146.69615174
TCGA-33-A5GW-01A	26	136	-0.387018304295651	1342486.11878952	3436764.46410116	4779250.58289067
TCGA-33-AAS8-01A	17	209	-0.0569901394288766	912890.56077687	4779250.58289067	5692141.14366754
TCGA-33-AASB-01A	15	262	0.206001054449334	751792.226522129	7303124.48621496	8054916.71273709
TCGA-33-AASD-01A	22	231	0.0822404926242937	1127688.33978319	5262545.5856549	6390233.92543809
TCGA-33-AASI-01A	17	103	-0.603599287489471	912890.56077687	2738671.68233061	3651562.24310748
TCGA-33-AASJ-01A	18	323	0.536029219316108	805491.671273709	8645610.60500448	9451102.27627819
TCGA-33-AASL-01A	12	219	-0.0312066890486599	644393.337018967	6551332.25969283	7195725.5967118
TCGA-34-2596-01A	29	206	-0.0105799287444865	1503584.45304426	4671851.69338751	6175436.14643177
TCGA-34-2600-01A	21	267	0.262724645285811	966590.005528451	4188556.69062329	5155146.69615174
TCGA-34-2604-01A	1	130	-0.546875696652995	53699.4447515806	4027458.35636855	4081157.80112013
TCGA-34-2605-01A	16	232	0.056457042244077	751792.226522129	4832950.02764225	5692141.14366754
TCGA-34-2608-01A	4	54	-0.923314072204159	214797.779006322	1986879.45580848	2201677.2348148
TCGA-34-2609-01A	6	323	0.474148938403588	322196.668509484	8269714.49174341	8591911.1602529
TCGA-34-5231-01A	24	227	0.071927112472207	1288786.67403793	5477343.36466122	6819829.48345074
TCGA-34-5232-01A	1	51	-0.954254212660419	53699.4447515806	1879480.56630532	1933180.0110569
TCGA-34-5234-01A	0	30	-1.06770139433337	0	1342486.11878952	1342486.11878952
TCGA-34-5236-01A	7	140	-0.464368655436301	375896.113261064	4725551.13813909	5101447.25140016
TCGA-34-5239-01A	10	55	-0.887217241671856	536994.447515806	1664682.787299	2201677.2348148
TCGA-34-5240-01A	24	183	-0.1549672508737	1127688.33978319	3973758.91161696	5101447.25140016
TCGA-34-5241-01A	3	120	-0.588129217261341	161098.334254742	4027458.35636855	4188556.69062329
TCGA-34-5927-01A	20	137	-0.412801754675868	912890.56077687	3221966.68509484	4134857.24587171
TCGA-34-5928-01A	16	258	0.190530984221204	805491.671273709	6605031.70444442	7410523.37571812
TCGA-34-5929-01A	19	115	-0.531405626424865	966590.005528451	2631272.79282745	3597862.7983559
TCGA-34-7107-01A	23	142	-0.371548234067521	1181387.78453477	2953469.46133693	4134857.24587171
TCGA-34-8454-01A	7	118	-0.577815837109255	322196.668509484	3597862.7983559	3920059.46686538
TCGA-34-8455-01A	11	113	-0.582972527185298	590693.892267387	2684972.23757903	3275666.12984642
TCGA-34-8456-01A	25	140	-0.371548234067521	1181387.78453477	3705261.68785906	4886649.47239384
TCGA-34-A5IX-01A	15	324	0.525715839164022	805491.671273709	9612200.61053293	10417692.2818066
TCGA-35-3615-01A	4	100	-0.465365201954662	214797.779006322	3168267.24034326	3383065.01934958
TCGA-35-4122-01A	0	130	-0.270792337007297	0	4081157.80112013	4081157.80112013
TCGA-35-4123-01A	12	78	-0.570135206157089	644393.337018967	2684972.23757903	3329365.574598
TCGA-35-5375-01A	17	408	1.93686132297242	751792.226522129	11330582.8425835	12136074.5138572
TCGA-36-1568-01A	8	253	-0.69655675357956	429595.558012645	6175436.14643177	6605031.70444442
TCGA-36-1569-01A	19	125	-1.09970576348954	805491.671273709	3221966.68509484	4027458.35636855
TCGA-36-1570-01A	9	404	-0.172807612499933	375896.113261064	8323413.93649499	8699310.04975606
TCGA-36-1571-01A	21	425	-0.0590989173971198	966590.005528451	10900987.2845709	11867577.2900993
TCGA-36-1574-01A	11	288	-0.565619468309653	483295.002764226	6873528.92820232	7356823.93096654
TCGA-36-1575-01A	20	489	0.157981318708252	912890.56077687	10149195.0580487	11062085.6188256
TCGA-36-1576-01A	11	283	-0.582848058476746	590693.892267387	8162315.60224025	8753009.49450764
TCGA-36-1577-01A	14	279	-0.586293776510165	751792.226522129	7195725.5967118	7947517.82323393
TCGA-36-1578-01A	9	735	0.967725056561622	375896.113261064	18848505.1078048	19224401.2210659
TCGA-36-1580-01A	16	311	-0.469139363373933	698092.781770548	8538211.71550132	9236304.49727187
TCGA-36-1581-01A	13	420	-0.103893251831562	536994.447515806	12136074.5138572	12673068.961373
TCGA-36-2529-01A	5	814	1.22615390906802	268497.223757903	22070471.7928996	22338969.0166575
TCGA-36-2530-01A	7	730	0.943605030327692	375896.113261064	20996482.897868	21426078.4558807
TCGA-36-2532-01A	2	913	1.5569428402762	107398.889503161	32756661.2984642	32864060.1879673
TCGA-36-2533-01A	8	530	0.257907141677391	429595.558012645	14606248.9724299	15035844.5304426
TCGA-36-2534-01A	8	712	0.885027823759576	375896.113261064	20029892.8923396	20405789.0056006
TCGA-36-2537-01A	4	602	0.492215967949856	214797.779006322	20137291.7818427	20405789.0056006
TCGA-36-2538-01A	4	672	0.733416230289157	214797.779006322	20459488.4503522	20674286.2293585
TCGA-36-2540-01A	3	84	-1.2961116913944	161098.334254742	3383065.01934958	3544163.35360432
TCGA-36-2542-01A	12	387	-0.221047664967794	644393.337018967	12082375.0691056	12726768.4061246
TCGA-36-2543-01A	7	680	0.771319128656762	375896.113261064	19815095.1133332	20190991.2265943
TCGA-36-2544-01A	2	849	1.33641688613741	107398.889503161	29266197.3896114	29427295.7238662
TCGA-36-2545-01A	5	596	0.474987377782763	268497.223757903	18472608.9945437	18741106.2183016
TCGA-36-2547-01A	4	769	1.06765087953076	214797.779006322	19815095.1133332	20029892.8923396
TCGA-36-2548-01A	5	1148	2.37702373222983	268497.223757903	36515622.4310748	36784119.6548327
TCGA-36-2549-01A	2	698	0.816113463091204	107398.889503161	22500067.3509123	22607466.2404154
TCGA-36-2551-01A	6	877	1.44667986320681	322196.668509484	27010820.710045	27333017.3785545
TCGA-36-2552-01A	20	567	0.426747325314902	912890.56077687	14659948.4171815	15572838.9779584
TCGA-37-3783-01A	8	241	0.0616137323201203	429595.558012645	7625321.15472445	8054916.71273709
TCGA-37-3789-01A	11	268	0.216314434601421	590693.892267387	6980927.81770548	7571621.70997287
TCGA-37-3792-01A	3	929	3.58363305425773	161098.334254742	35495332.9807948	35656431.3150495
TCGA-37-4129-01A	2	905	3.45471580235664	107398.889503161	33508453.5249863	33615852.4144895
TCGA-37-4130-01A	4	1266	5.32659429996038	214797.779006322	47899904.7184099	48114702.4974162
TCGA-37-4132-01A	4	1457	6.31152210448466	214797.779006322	50584876.9559889	50799674.7349953
TCGA-37-4133-01A	19	207	-0.0569901394288766	859191.11602529	5101447.25140016	5960638.36742545
TCGA-37-4135-01A	9	2313	10.751432259958	429595.558012645	64224535.9228904	64654131.4809031
TCGA-37-4141-01A	10	829	3.10406087718569	536994.447515806	26097930.1492682	26688624.0415356
TCGA-37-5819-01A	19	432	1.10326512768088	966590.005528451	11384282.2873351	12350872.2928635
TCGA-37-A5EL-01A	15	375	0.788707033042232	805491.671273709	6551332.25969283	7356823.93096654
TCGA-37-A5EM-01A	11	198	-0.144653870721614	590693.892267387	3920059.46686538	4510753.35913277
TCGA-37-A5EN-01A	15	375	0.788707033042232	805491.671273709	8430812.82599816	9236304.49727187
TCGA-38-4625-01A	9	204	0.35034411647852	483295.002764226	5745840.58841913	6229135.59118335
TCGA-38-4626-01A	1	109	-0.420463771582193	53699.4447515806	4081157.80112013	4134857.24587171
TCGA-38-4627-01A	0	88	-0.585102349614579	0	3168267.24034326	3168267.24034326
TCGA-38-4628-01A	14	325	1.29327415430036	698092.781770548	8430812.82599816	9128905.6077687
TCGA-38-4629-01A	6	205	0.335376973021031	268497.223757903	6014337.81217703	6282835.03593493
TCGA-38-4630-01A	2	775	4.57107857149058	107398.889503161	23949952.359205	24057351.2487081
TCGA-38-4631-01A	11	411	1.91441060778618	590693.892267387	11169484.5083288	11760178.4005962
TCGA-38-4632-01A	13	207	0.402729118579734	644393.337018967	6497632.81494125	7142026.15196022
TCGA-38-6178-01A	10	200	0.327893401292286	536994.447515806	5906938.92267387	6443933.37018967
TCGA-38-7271-01A	1	22	-1.07153451198299	53699.4447515806	1073988.89503161	1127688.33978319
TCGA-38-A44F-01A	0	23	-1.07153451198299	0	805491.671273709	805491.671273709
TCGA-39-5011-01A	2	242	0.0358302819399036	107398.889503161	7732720.04422761	7840118.93373077
TCGA-39-5016-01A	20	216	-0.00542323866844317	1073988.89503161	5101447.25140016	6175436.14643177
TCGA-39-5019-01A	13	266	0.216314434601421	698092.781770548	7034627.26245706	7732720.04422761
TCGA-39-5021-01A	7	154	-0.392174994371694	375896.113261064	4134857.24587171	4510753.35913277
TCGA-39-5022-01A	2	30	-1.05738801418129	107398.889503161	1127688.33978319	1235087.22928635
TCGA-39-5024-01A	6	116	-0.593285907337385	268497.223757903	3597862.7983559	3866360.0221138
TCGA-39-5027-01A	17	118	-0.526248936348821	912890.56077687	3168267.24034326	4081157.80112013
TCGA-39-5028-01A	2	50	-0.954254212660419	53699.4447515806	1772081.67680216	1825781.12155374
TCGA-39-5029-01A	11	264	0.195687674297247	590693.892267387	9021506.71826554	9612200.61053293
TCGA-39-5030-01A	3	33	-1.03676125387711	161098.334254742	1235087.22928635	1396185.5635411
TCGA-39-5031-01A	14	207	-0.0827735898090934	698092.781770548	5531042.8094128	6229135.59118335
TCGA-39-5034-01A	12	295	0.360701756730634	590693.892267387	9075206.16301712	9665900.05528451
TCGA-39-5035-01A	11	217	-0.0466767592767899	536994.447515806	5584742.25416438	6121736.70168019
TCGA-39-5036-01A	11	180	-0.237474292090394	590693.892267387	4457053.91438119	5047747.80664858
TCGA-39-5037-01A	5	553	1.65503096581751	268497.223757903	17774516.2127732	18043013.4365311
TCGA-39-5039-01A	2	50	-0.954254212660419	107398.889503161	1557283.89779584	1664682.787299
TCGA-39-5040-01A	15	124	-0.505622176044648	805491.671273709	3758961.13261064	4564452.80388435
TCGA-3A-A9I5-01A	7	97	0.456027075842908	375896.113261064	3329365.574598	3705261.68785906
TCGA-3A-A9I7-01A	0	27	-0.884705775483574	0	1073988.89503161	1073988.89503161
TCGA-3A-A9I9-01A	11	101	0.595323995461243	590693.892267387	3221966.68509484	3812660.57736222
TCGA-3A-A9IB-01A	8	116	0.804269374888747	429595.558012645	4295955.58012645	4725551.13813909
TCGA-3A-A9IC-01A	14	66	0.0381363169879003	751792.226522129	2147977.79006322	2899770.01658535
TCGA-3A-A9IH-01A	7	62	-0.153396947487311	375896.113261064	2255376.67956639	2631272.79282745
TCGA-3A-A9IJ-01A	0	24	-0.93694212034045	0	859191.11602529	859191.11602529
TCGA-3A-A9IL-01A	19	40	-0.327518097010231	1020289.45028003	1235087.22928635	2255376.67956639
TCGA-3A-A9IN-01A	24	67	0.229669581463112	1288786.67403793	1825781.12155374	3114567.79559168
TCGA-3A-A9IO-01A	13	35	-0.519051361485443	698092.781770548	1235087.22928635	1933180.0110569
TCGA-3A-A9IR-01A	3	69	-0.101160602630435	107398.889503161	2523873.90332429	2631272.79282745
TCGA-3A-A9IS-01A	19	88	0.508263420699784	1020289.45028003	2684972.23757903	3705261.68785906
TCGA-3A-A9IU-01A	9	49	-0.344930211962523	483295.002764226	1610983.34254742	2094278.34531164
TCGA-3A-A9IV-01A	24	95	0.717208800127287	1288786.67403793	2147977.79006322	3436764.46410116
TCGA-3A-A9IX-01A	0	47	-0.536463476437735	0	1718382.23205058	1718382.23205058
TCGA-3A-A9IZ-01A	9	98	0.508263420699784	483295.002764226	2738671.68233061	3221966.68509484
TCGA-3A-A9J0-01A	16	183	2.11017799631064	859191.11602529	5316245.03040648	6175436.14643177
TCGA-3B-A9HI-01A	13	467	0.744298563837412	644393.337018967	14069254.5249141	14713647.8619331
TCGA-3B-A9HJ-01A	0	100	-0.87663070429	0	3812660.57736222	3812660.57736222
TCGA-3B-A9HL-01A	7	573	1.17085889755515	268497.223757903	14659948.4171815	14928445.6409394
TCGA-3B-A9HO-01A	5	389	0.377456676840155	268497.223757903	10310293.3923035	10578790.6160614
TCGA-3B-A9HP-01A	8	71	-0.966208374370725	429595.558012645	2362775.56906955	2792371.12708219
TCGA-3B-A9HQ-01A	7	66	-0.991801994393789	375896.113261064	1986879.45580848	2362775.56906955
TCGA-3B-A9HR-01A	23	189	-0.398883130526131	1181387.78453477	4242256.13537487	5423643.91990964
TCGA-3B-A9HS-01A	9	647	1.49504475118063	429595.558012645	19224401.2210659	19653996.7790785
TCGA-3B-A9HT-01A	2	59	-1.04298923443992	107398.889503161	2201677.2348148	2362775.56906955
TCGA-3B-A9HU-01A	9	63	-0.996067597730967	375896.113261064	2309076.12431797	2684972.23757903
TCGA-3B-A9HV-01A	4	273	-0.1216189136096	107398.889503161	8001217.26798551	8108616.15748867
TCGA-3B-A9HX-01A	21	310	0.108723666597979	1020289.45028003	9773298.94478767	10793588.3950677
TCGA-3B-A9HY-01A	6	103	-0.838240274255403	322196.668509484	2792371.12708219	3114567.79559168
TCGA-3B-A9HZ-01A	6	114	-0.791318637546452	268497.223757903	2953469.46133693	3221966.68509484
TCGA-3B-A9I0-01A	4	93	-0.889427514301532	214797.779006322	2846070.57183377	3060868.35084009
TCGA-3B-A9I1-01A	16	212	-0.330633477131293	859191.11602529	7195725.5967118	8108616.15748867
TCGA-3B-A9I3-01A	0	79	-0.966208374370725	0	3060868.35084009	3114567.79559168
TCGA-3C-AAAU-01A	32	389	1.06902738673993	1503584.45304426	9665900.05528451	11169484.5083288
TCGA-3C-AALI-01A	23	378	0.965312400239571	1127688.33978319	8806708.93925922	9934397.27904241
TCGA-3C-AALJ-01A	11	560	1.84688978549261	590693.892267387	15733937.3122131	16324631.2044805
TCGA-3C-AALK-01A	5	46	-0.849699863516693	214797.779006322	1557283.89779584	1772081.67680216
TCGA-3E-AAAY-01A	0	21	-0.989178465197326	0	805491.671273709	805491.671273709
TCGA-3E-AAAZ-01A	5	34	-0.675760396056071	268497.223757903	1235087.22928635	1503584.45304426
TCGA-3G-AB0O-01A	0	24	-0.606449933941591	0	1020289.45028003	1020289.45028003
TCGA-3G-AB0Q-01A	0	41	-0.0189515604356747	0	1449885.00829268	1449885.00829268
TCGA-3G-AB0T-01A	2	23	-0.571891206088302	0	805491.671273709	805491.671273709
TCGA-3G-AB14-01A	3	55	0.568546813070241	161098.334254742	2201677.2348148	2362775.56906955
TCGA-3G-AB19-01A	1	29	-0.399097566821856	53699.4447515806	1073988.89503161	1127688.33978319
TCGA-3H-AB3K-01A	5	40	-0.907011451584839	268497.223757903	1288786.67403793	1557283.89779584
TCGA-3H-AB3L-01A	10	111	0.439756955753799	536994.447515806	3060868.35084009	3597862.7983559
TCGA-3H-AB3M-01A	18	212	2.37130638206843	966590.005528451	5853239.47792229	6819829.48345074
TCGA-3H-AB3O-01A	0	16	-1.42090992280616	0	805491.671273709	805491.671273709
TCGA-3H-AB3S-01A	4	90	-0.0387002415901907	214797.779006322	2953469.46133693	3168267.24034326
TCGA-3H-AB3T-01A	9	57	-0.534878075872847	483295.002764226	2040578.90056006	2523873.90332429
TCGA-3H-AB3U-01A	29	118	0.900493516159123	1557283.89779584	4081157.80112013	5638441.69891596
TCGA-3H-AB3X-01A	12	44	-0.71208444525951	483295.002764226	1396185.5635411	1879480.56630532
TCGA-3K-AAZ8-01A	6	43	-0.795198011220122	214797.779006322	1396185.5635411	1610983.34254742
TCGA-3L-AA1B-01A	5	79	-0.43280243609047	268497.223757903	3383065.01934958	3651562.24310748
TCGA-3M-AB46-01A	15	193	0.0924823003561138	805491.671273709	4564452.80388435	5369944.47515806
TCGA-3M-AB47-01A	6	49	-0.732719974862589	268497.223757903	1986879.45580848	2255376.67956639
TCGA-3P-A9WA-01A	21	485	0.147644164607996	1127688.33978319	11760178.4005962	12887866.7403793
TCGA-3Q-A9WF-01A	0	24	-0.606449933941591	0	1073988.89503161	1073988.89503161
TCGA-3R-A8YX-01A	12	496	0.863735457278379	590693.892267387	12780467.8508762	13371161.7431436
TCGA-3S-A8YW-01A	22	108	3.05677521850706	1020289.45028003	3490463.90885274	4510753.35913277
TCGA-3S-AAYX-01A	0	50	0.292076990243928	0	2416475.01382113	2416475.01382113
TCGA-3T-AA9L-01A	0	19	-0.779243573208037	0	912890.56077687	912890.56077687
TCGA-3U-A98D-01A	12	219	2.38902701900709	590693.892267387	6873528.92820232	7464222.82046971
TCGA-3U-A98E-01A	4	49	-0.765246356075509	214797.779006322	1772081.67680216	1986879.45580848
TCGA-3U-A98F-01A	23	156	1.46755389819644	1235087.22928635	4295955.58012645	5531042.8094128
TCGA-3U-A98G-01A	0	26	-1.2437035534195	0	1073988.89503161	1073988.89503161
TCGA-3U-A98H-01A	2	33	-1.0842178209715	107398.889503161	1181387.78453477	1288786.67403793
TCGA-3U-A98I-01A	9	116	0.510639503508465	483295.002764226	3758961.13261064	4242256.13537487
TCGA-3U-A98J-01A	7	71	-0.322230432608851	375896.113261064	2094278.34531164	2470174.45857271
TCGA-3X-AAV9-01A	0	42	-1.21351449360664	0	1610983.34254742	1610983.34254742
TCGA-3X-AAVA-01A	7	96	-0.0785580081040076	375896.113261064	3383065.01934958	3758961.13261064
TCGA-3X-AAVB-01A	10	61	-0.673945016892275	536994.447515806	1825781.12155374	2362775.56906955
TCGA-3X-AAVC-01A	23	164	1.48433288996519	1181387.78453477	4403354.46962961	5584742.25416438
TCGA-3X-AAVE-01A	6	57	-0.822791769089341	322196.668509484	1772081.67680216	2094278.34531164
TCGA-3Z-A93Z-01A	5	41	-0.382211378836097	268497.223757903	1503584.45304426	1772081.67680216
TCGA-41-2571-01A	7	85	-0.496485677108322	268497.223757903	2255376.67956639	2523873.90332429
TCGA-41-2572-01A	10	123	-0.0365262971518372	483295.002764226	4081157.80112013	4564452.80388435
TCGA-41-2573-01A	15	122	0.00834778869757593	698092.781770548	3329365.574598	4027458.35636855
TCGA-41-2575-01A	13	274	1.69112600805057	375896.113261064	8645610.60500448	9021506.71826554
TCGA-41-3392-01A	4	190	0.647803512051713	214797.779006322	4081157.80112013	4295955.58012645
TCGA-41-3393-01A	6	72	-0.653544977581268	322196.668509484	2684972.23757903	3007168.90608851
TCGA-41-3915-01A	16	155	0.389777518417588	859191.11602529	4671851.69338751	5531042.8094128
TCGA-41-4097-01A	7	146	0.187844132095228	375896.113261064	5155146.69615174	5531042.8094128
TCGA-41-5651-01A	9	99	-0.316989333710669	429595.558012645	2470174.45857271	2899770.01658535
TCGA-41-6646-01A	5	86	-0.507704198570675	268497.223757903	3329365.574598	3651562.24310748
TCGA-42-2582-01A	1	516	0.185547062975601	53699.4447515806	13961855.635411	14015555.0801625
TCGA-42-2587-01A	1	1393	3.20744177828371	53699.4447515806	48973893.6134415	49027593.0581931
TCGA-42-2588-01A	1	861	1.37431978450502	53699.4447515806	29105099.0553567	29158798.5001083
TCGA-42-2589-01A	12	931	1.65342294521192	590693.892267387	24486946.8067208	25077640.6989881
TCGA-42-2590-01A	11	200	-0.86884265525049	590693.892267387	5155146.69615174	5745840.58841913
TCGA-42-2591-01A	7	1070	2.11514916169001	375896.113261064	29534694.6133693	29910590.7266304
TCGA-42-2593-01A	7	768	1.0745423155976	322196.668509484	24701744.5857271	25023941.2542366
TCGA-43-2576-01A	9	256	0.144120773536814	483295.002764226	8269714.49174341	8753009.49450764
TCGA-43-2578-01A	16	350	0.664946471217192	805491.671273709	9075206.16301712	9880697.83429083
TCGA-43-2581-01A	7	119	-0.572659147033211	375896.113261064	3651562.24310748	4027458.35636855
TCGA-43-3394-01A	21	452	1.21671230935383	966590.005528451	10471391.7265582	11437981.7320867
TCGA-43-3920-01A	17	299	0.407111967415025	859191.11602529	8162315.60224025	9021506.71826554
TCGA-43-5668-01A	10	242	0.0770838025482504	536994.447515806	6819829.48345074	7356823.93096654
TCGA-43-5670-01A	16	407	0.958877805551663	751792.226522129	11437981.7320867	12243473.4033604
TCGA-43-6143-01A	18	461	1.24765244981009	859191.11602529	12028675.6243541	12887866.7403793
TCGA-43-6647-01A	0	111	-0.650009498173862	0	3007168.90608851	3007168.90608851
TCGA-43-6770-01A	13	282	0.298821475818114	536994.447515806	7464222.82046971	8001217.26798551
TCGA-43-6771-01A	1	205	-0.160123940949744	53699.4447515806	7034627.26245706	7088326.70720864
TCGA-43-6773-01A	0	29	-1.07285808440942	0	1235087.22928635	1235087.22928635
TCGA-43-7656-01A	15	132	-0.464368655436301	751792.226522129	3329365.574598	4081157.80112013
TCGA-43-7657-01A	13	271	0.242097884981638	644393.337018967	6819829.48345074	7464222.82046971
TCGA-43-7658-01A	18	319	0.515402459011935	859191.11602529	7732720.04422761	8591911.1602529
TCGA-43-8115-01A	11	102	-0.639696118021775	590693.892267387	2523873.90332429	3114567.79559168
TCGA-43-8116-01A	12	209	-0.0827735898090934	590693.892267387	5262545.5856549	5853239.47792229
TCGA-43-8118-01A	9	216	-0.06214682950492	483295.002764226	6390233.92543809	6873528.92820232
TCGA-43-A474-01A	18	300	0.417425347567111	859191.11602529	8430812.82599816	9290003.94202345
TCGA-43-A475-01A	4	104	-0.665479568401992	214797.779006322	3275666.12984642	3490463.90885274
TCGA-43-A56U-01A	1	27	-1.07801477448546	53699.4447515806	966590.005528451	1020289.45028003
TCGA-43-A56V-01A	23	201	-0.0673035195809633	1073988.89503161	4940348.91714542	6014337.81217703
TCGA-44-2655-01A	4	86	-0.570135206157089	214797.779006322	2470174.45857271	2684972.23757903
TCGA-44-2656-01A	8	254	0.717039131187015	429595.558012645	8967807.27351396	9397402.83152661
TCGA-44-2656-01B	0	58	-0.809609501476923	0	2201677.2348148	2201677.2348148
TCGA-44-2657-01A	4	173	0.0809355342437079	214797.779006322	5853239.47792229	6068037.25692861
TCGA-44-2659-01A	10	298	1.06128343070928	429595.558012645	6819829.48345074	7249425.04146338
TCGA-44-2661-01A	0	68	-0.734773784189475	0	2899770.01658535	2899770.01658535
TCGA-44-2662-01A	7	266	0.799358420203208	375896.113261064	7732720.04422761	8108616.15748867
TCGA-44-2662-01B	1	127	-0.285759480464787	53699.4447515806	4403354.46962961	4457053.91438119
TCGA-44-2665-01A	7	121	-0.285759480464787	375896.113261064	4027458.35636855	4403354.46962961
TCGA-44-2665-01B	1	38	-0.951797364323074	53699.4447515806	1396185.5635411	1449885.00829268
TCGA-44-2666-01A	2	78	-0.644970923444537	107398.889503161	3221966.68509484	3329365.574598
TCGA-44-2666-01B	2	53	-0.832060216663157	107398.889503161	2094278.34531164	2201677.2348148
TCGA-44-2668-01A	6	191	0.230606968818604	322196.668509484	6175436.14643177	6497632.81494125
TCGA-44-2668-01B	0	124	-0.315693767379766	0	4564452.80388435	4564452.80388435
TCGA-44-3396-01A	2	135	-0.218407334906084	107398.889503161	5047747.80664858	5155146.69615174
TCGA-44-3398-01A	0	56	-0.824576644934412	0	2040578.90056006	2040578.90056006
TCGA-44-3917-01A	15	300	1.11366843281049	805491.671273709	8860408.3840108	9665900.05528451
TCGA-44-3917-01B	7	230	0.529949837968396	375896.113261064	6336534.48068651	6712430.59394758
TCGA-44-3918-01A	7	298	1.03883271552304	375896.113261064	9343703.38677503	9719599.50003609
TCGA-44-3918-01B	2	123	-0.308210195651021	107398.889503161	3705261.68785906	3812660.57736222
TCGA-44-3919-01A	8	76	-0.615036636529558	429595.558012645	2577573.34807587	3007168.90608851
TCGA-44-4112-01A	8	254	0.717039131187015	429595.558012645	8216015.04699183	8645610.60500448
TCGA-44-4112-01B	0	62	-0.779675214561944	0	1986879.45580848	1986879.45580848
TCGA-44-5643-01A	25	144	0.0210669604137495	1235087.22928635	3221966.68509484	4457053.91438119
TCGA-44-5644-01A	8	739	4.34657141962824	375896.113261064	19761395.6685817	20137291.7818427
TCGA-44-5645-01A	8	276	0.881677709219401	429595.558012645	6980927.81770548	7410523.37571812
TCGA-44-5645-01B	0	139	-0.203440191448594	0	4886649.47239384	4886649.47239384
TCGA-44-6144-01A	8	330	1.28579058257162	375896.113261064	11008386.174074	11384282.2873351
TCGA-44-6145-01A	1	45	-0.89941236222186	53699.4447515806	1718382.23205058	1772081.67680216
TCGA-44-6146-01A	7	190	0.230606968818604	375896.113261064	7088326.70720864	7464222.82046971
TCGA-44-6146-01B	6	73	-0.652454495173282	322196.668509484	2792371.12708219	3114567.79559168
TCGA-44-6147-01A	17	320	1.27830701084288	859191.11602529	9665900.05528451	10578790.6160614
TCGA-44-6147-01B	1	54	-0.832060216663157	53699.4447515806	1879480.56630532	1933180.0110569
TCGA-44-6148-01A	2	39	-0.936830220865584	107398.889503161	1288786.67403793	1396185.5635411
TCGA-44-6774-01A	4	171	0.0659683907862183	214797.779006322	4349655.02487803	4564452.80388435
TCGA-44-6775-01A	14	139	-0.0986701872461672	644393.337018967	4618152.24863593	5262545.5856549
TCGA-44-6775-01C	3	85	-0.585102349614579	161098.334254742	3007168.90608851	3168267.24034326
TCGA-44-6776-01A	6	35	-0.936830220865584	322196.668509484	1073988.89503161	1396185.5635411
TCGA-44-6777-01A	3	81	-0.615036636529558	161098.334254742	1610983.34254742	1772081.67680216
TCGA-44-6778-01A	13	287	1.00141485687932	644393.337018967	9665900.05528451	10310293.3923035
TCGA-44-6779-01A	17	336	1.39804415850279	912890.56077687	9988096.72379399	10900987.2845709
TCGA-44-7659-01A	5	66	-0.71232306900324	268497.223757903	1664682.787299	1933180.0110569
TCGA-44-7660-01A	17	430	2.1014999010048	912890.56077687	12028675.6243541	12941566.1851309
TCGA-44-7661-01A	2	24	-1.04908379679676	107398.889503161	912890.56077687	1020289.45028003
TCGA-44-7662-01A	7	173	0.103386249429942	375896.113261064	4564452.80388435	4940348.91714542
TCGA-44-7667-01A	13	341	1.40552773023154	644393.337018967	10363992.8370551	11008386.174074
TCGA-44-7669-01A	12	356	1.51029773443396	644393.337018967	9182605.05252028	9826998.38953925
TCGA-44-7670-01A	15	992	6.29230006910189	805491.671273709	25077640.6989881	25936831.8150134
TCGA-44-7671-01A	10	100	-0.420463771582193	536994.447515806	3007168.90608851	3544163.35360432
TCGA-44-7672-01A	1	155	-0.0762194720599328	53699.4447515806	4295955.58012645	4349655.02487803
TCGA-44-8117-01A	22	264	0.896644852676891	1127688.33978319	6497632.81494125	7625321.15472445
TCGA-44-8119-01A	10	291	1.00889842860806	536994.447515806	8806708.93925922	9343703.38677503
TCGA-44-8120-01A	14	111	-0.308210195651021	751792.226522129	3812660.57736222	4564452.80388435
TCGA-44-A479-01A	2	89	-0.562651634428344	107398.889503161	3007168.90608851	3114567.79559168
TCGA-44-A47A-01A	5	43	-0.884445218764371	268497.223757903	1557283.89779584	1825781.12155374
TCGA-44-A47B-01A	8	178	0.148287679802411	429595.558012645	5906938.92267387	6336534.48068651
TCGA-44-A47F-01A	11	45	-0.824576644934412	590693.892267387	1449885.00829268	2040578.90056006
TCGA-44-A47G-01A	0	29	-1.02663308161052	0	1020289.45028003	1020289.45028003
TCGA-44-A4SS-01A	1	46	-0.891928790493115	53699.4447515806	1772081.67680216	1825781.12155374
TCGA-44-A4SU-01A	10	114	-0.315693767379766	536994.447515806	3544163.35360432	4081157.80112013
TCGA-46-3765-01A	7	355	0.644319710913019	375896.113261064	8914107.82876238	9290003.94202345
TCGA-46-3766-01A	1	64	-0.887217241671856	53699.4447515806	1718382.23205058	1772081.67680216
TCGA-46-3767-01A	4	67	-0.856277101215595	214797.779006322	2309076.12431797	2523873.90332429
TCGA-46-3768-01A	17	190	-0.1549672508737	912890.56077687	4349655.02487803	5262545.5856549
TCGA-46-3769-01A	6	470	1.23218237958196	322196.668509484	12995265.6298825	13317462.298392
TCGA-46-6025-01A	10	408	0.933094355171446	536994.447515806	10256593.9475519	10793588.3950677
TCGA-46-6026-01A	14	394	0.881527454411013	644393.337018967	9397402.83152661	10041796.1685456
TCGA-49-4486-01A	2	107	-0.427947343310938	107398.889503161	3436764.46410116	3544163.35360432
TCGA-49-4487-01A	4	140	-0.16602233280487	214797.779006322	4457053.91438119	4671851.69338751
TCGA-49-4488-01A	14	381	1.71235417111007	590693.892267387	10525091.1713098	11115785.0635772
TCGA-49-4490-01A	10	178	0.163254823259901	536994.447515806	4832950.02764225	5369944.47515806
TCGA-49-4494-01A	5	68	-0.697355925545751	161098.334254742	2147977.79006322	2309076.12431797
TCGA-49-4501-01A	7	174	0.110869821158687	375896.113261064	5262545.5856549	5638441.69891596
TCGA-49-4505-01A	10	278	0.91161199613438	536994.447515806	8162315.60224025	8699310.04975606
TCGA-49-4506-01A	2	38	-0.944313792594329	107398.889503161	1396185.5635411	1503584.45304426
TCGA-49-4507-01A	5	179	0.133320536344921	214797.779006322	3758961.13261064	3973758.91161696
TCGA-49-4510-01A	18	140	-0.0612523286024432	966590.005528451	3490463.90885274	4457053.91438119
TCGA-49-4512-01A	13	134	-0.143571617618636	644393.337018967	3544163.35360432	4188556.69062329
TCGA-49-4514-01A	2	147	-0.128604474161146	107398.889503161	6014337.81217703	6121736.70168019
TCGA-49-6742-01A	3	78	-0.637487351715792	161098.334254742	2362775.56906955	2523873.90332429
TCGA-49-6743-01A	4	113	-0.36807876948098	161098.334254742	4134857.24587171	4295955.58012645
TCGA-49-6744-01A	3	130	-0.248341621821063	161098.334254742	4618152.24863593	4779250.58289067
TCGA-49-6745-01A	2	179	0.110869821158687	107398.889503161	5423643.91990964	5531042.8094128
TCGA-49-6761-01A	7	40	-0.891928790493115	322196.668509484	1342486.11878952	1664682.787299
TCGA-49-6767-01A	16	220	0.522466266239651	859191.11602529	5906938.92267387	6766130.03869916
TCGA-49-AAQV-01A	8	105	-0.398013056395959	429595.558012645	3812660.57736222	4242256.13537487
TCGA-49-AAR0-01A	4	149	-0.0986701872461672	214797.779006322	4940348.91714542	5155146.69615174
TCGA-49-AAR2-01A	10	96	-0.450398058497173	536994.447515806	2684972.23757903	3221966.68509484
TCGA-49-AAR3-01A	0	37	-0.966764507780563	0	1342486.11878952	1342486.11878952
TCGA-49-AAR4-01A	1	46	-0.891928790493115	53699.4447515806	1825781.12155374	1879480.56630532
TCGA-49-AAR9-01A	9	369	1.58513345172141	375896.113261064	10632490.060813	11008386.174074
TCGA-49-AARE-01A	10	312	1.1660534349117	536994.447515806	9504801.72102977	10095495.6132972
TCGA-49-AARN-01A	9	83	-0.5551680626996	483295.002764226	2846070.57183377	3383065.01934958
TCGA-49-AARO-01A	5	108	-0.398013056395959	268497.223757903	3221966.68509484	3490463.90885274
TCGA-49-AARQ-01A	14	123	-0.218407334906084	644393.337018967	3383065.01934958	4027458.35636855
TCGA-49-AARR-01A	0	22	-1.07901808371174	0	912890.56077687	912890.56077687
TCGA-4A-A93W-01A	4	30	-0.522271797494022	214797.779006322	1181387.78453477	1396185.5635411
TCGA-4A-A93X-01A	23	77	0.578276722161992	1235087.22928635	2577573.34807587	3812660.57736222
TCGA-4A-A93Y-01A	0	27	-0.638996640487841	0	966590.005528451	966590.005528451
TCGA-4B-A93V-01A	16	226	0.56736769661212	859191.11602529	5584742.25416438	6443933.37018967
TCGA-4C-A93U-01A	1	47	0.656211486276185	53699.4447515806	1449885.00829268	1503584.45304426
TCGA-4E-A92E-01A	1	47	-0.590857957503081	53699.4447515806	1718382.23205058	1772081.67680216
TCGA-4G-AAZO-01A	2	73	-0.599521640793741	107398.889503161	2362775.56906955	2470174.45857271
TCGA-4G-AAZT-01A	8	49	-0.934426833237142	375896.113261064	1718382.23205058	2094278.34531164
TCGA-4H-AAAK-01A	11	92	-0.580040898615762	536994.447515806	2577573.34807587	3114567.79559168
TCGA-4J-AA1J-01A	11	166	0.618788283903929	375896.113261064	4510753.35913277	4886649.47239384
TCGA-4K-AA1G-01A	14	85	-0.253363355952668	698092.781770548	2309076.12431797	3007168.90608851
TCGA-4K-AA1H-01A	0	31	-1.26939663574249	0	1181387.78453477	1181387.78453477
TCGA-4K-AA1I-01A	2	82	-0.477488344141599	107398.889503161	2792371.12708219	2899770.01658535
TCGA-4K-AAAL-01A	18	64	-0.507371675900123	912890.56077687	1503584.45304426	2416475.01382113
TCGA-4L-AA1F-01A	5	84	-0.0211984114425957	268497.223757903	2523873.90332429	2792371.12708219
TCGA-4N-A93T-01A	15	103	-0.109528034468544	644393.337018967	2738671.68233061	3383065.01934958
TCGA-4P-AA8J-01A	6	130	-0.0103155282007969	322196.668509484	4349655.02487803	4671851.69338751
TCGA-4R-AA8I-01A	1	162	0.321433015572028	53699.4447515806	4940348.91714542	4994048.361897
TCGA-4T-AA8H-01A	12	60	-0.546899283721738	590693.892267387	1879480.56630532	2470174.45857271
TCGA-4V-A9QI-01A	0	34	-0.260862655408699	0	1557283.89779584	1557283.89779584
TCGA-4V-A9QJ-01A	0	50	0.292076990243928	0	1986879.45580848	1986879.45580848
TCGA-4V-A9QL-01A	0	57	0.533988085216952	0	2362775.56906955	2362775.56906955
TCGA-4V-A9QM-01A	0	38	-0.122627743995542	0	1342486.11878952	1342486.11878952
TCGA-4V-A9QN-01A	10	54	0.775899180189977	483295.002764226	1610983.34254742	2094278.34531164
TCGA-4V-A9QQ-01A	0	39	-0.088069016142253	0	1664682.787299	1664682.787299
TCGA-4V-A9QR-01A	4	48	0.361194445950506	214797.779006322	1825781.12155374	2040578.90056006
TCGA-4V-A9QS-01A	1	38	-0.088069016142253	53699.4447515806	1396185.5635411	1449885.00829268
TCGA-4V-A9QT-01A	0	27	-0.502773750381723	0	1073988.89503161	1073988.89503161
TCGA-4V-A9QU-01A	0	27	-0.502773750381723	0	966590.005528451	966590.005528451
TCGA-4V-A9QW-01A	0	43	0.0501658952709037	0	1718382.23205058	1718382.23205058
TCGA-4V-A9QX-01A	0	21	-0.710126117501458	0	859191.11602529	859191.11602529
TCGA-4W-AA9R-01A	7	139	0.109314481858755	375896.113261064	4027458.35636855	4403354.46962961
TCGA-4W-AA9S-01A	8	163	0.389777518417588	429595.558012645	5155146.69615174	5584742.25416438
TCGA-4W-AA9T-01A	6	70	-0.675982020505974	322196.668509484	2684972.23757903	3007168.90608851
TCGA-4X-A9F9-01A	0	25	-0.571891206088302	0	1127688.33978319	1127688.33978319
TCGA-4X-A9FA-01A	0	32	-0.329980111115277	0	1342486.11878952	1342486.11878952
TCGA-4X-A9FB-01A	0	55	0.464870629510374	0	2147977.79006322	2147977.79006322
TCGA-4X-A9FC-01A	0	25	-0.571891206088302	0	1181387.78453477	1181387.78453477
TCGA-4X-A9FD-01A	4	44	0.22295953453735	214797.779006322	1288786.67403793	1503584.45304426
TCGA-4Z-AA7M-01A	14	360	0.92438003310438	698092.781770548	8323413.93649499	9021506.71826554
TCGA-4Z-AA7N-01A	0	35	-1.00421960009517	0	1449885.00829268	1449885.00829268
TCGA-4Z-AA7O-01A	4	98	-0.623050941026232	214797.779006322	2792371.12708219	3007168.90608851
TCGA-4Z-AA7Q-01A	2	143	-0.378420309086466	107398.889503161	4886649.47239384	4994048.361897
TCGA-4Z-AA7R-01A	10	595	2.23855854422266	429595.558012645	15787636.7569647	16217232.3149773
TCGA-4Z-AA7S-01A	12	92	-0.611672772098801	644393.337018967	2953469.46133693	3597862.7983559
TCGA-4Z-AA7W-01A	6	180	-0.145167846074131	322196.668509484	5745840.58841913	6068037.25692861
TCGA-4Z-AA7Y-01A	4	64	-0.816479812792559	107398.889503161	1610983.34254742	1718382.23205058
TCGA-4Z-AA80-01A	10	464	1.49328847947593	536994.447515806	13317462.298392	13854456.7459078
TCGA-4Z-AA81-01A	10	152	-0.281705873203303	536994.447515806	4188556.69062329	4725551.13813909
TCGA-4Z-AA82-01A	10	265	0.361160671196547	536994.447515806	8430812.82599816	8967807.27351396
TCGA-4Z-AA83-01A	3	31	-1.00990868455889	161098.334254742	1396185.5635411	1557283.89779584
TCGA-4Z-AA84-01A	8	530	1.85738988515372	429595.558012645	17452319.5442637	17881915.1022763
TCGA-4Z-AA86-01A	3	118	-0.514958336215638	161098.334254742	3114567.79559168	3275666.12984642
TCGA-4Z-AA87-01A	2	688	2.72213072363847	107398.889503161	19385499.5553206	19492898.4448238
TCGA-4Z-AA89-01A	2	90	-0.679941785663387	107398.889503161	3329365.574598	3436764.46410116
TCGA-50-5044-01A	0	22	-1.07901808371174	0	1073988.89503161	1073988.89503161
TCGA-50-5045-01A	3	102	-0.457881630225917	161098.334254742	3275666.12984642	3436764.46410116
TCGA-50-5049-01A	3	157	-0.0462851851449536	161098.334254742	4994048.361897	5155146.69615174
TCGA-50-5051-01A	20	75	-0.532717347513365	1020289.45028003	2309076.12431797	3329365.574598
TCGA-50-5055-01A	1	115	-0.375562341209725	53699.4447515806	4134857.24587171	4188556.69062329
TCGA-50-5066-01A	0	136	-0.225890906634829	0	4188556.69062329	4188556.69062329
TCGA-50-5068-01A	4	51	-0.832060216663157	214797.779006322	1986879.45580848	2255376.67956639
TCGA-50-5072-01A	8	56	-0.764708071104454	429595.558012645	1610983.34254742	2040578.90056006
TCGA-50-5930-01A	6	200	0.297959114377307	268497.223757903	7840118.93373077	8108616.15748867
TCGA-50-5931-01A	22	207	0.470081264138437	1020289.45028003	6282835.03593493	7303124.48621496
TCGA-50-5932-01A	16	217	0.500015551053416	805491.671273709	4994048.361897	5799540.03317071
TCGA-50-5933-01A	9	98	-0.442914486768428	375896.113261064	3114567.79559168	3490463.90885274
TCGA-50-5935-01A	14	140	-0.0911866155174224	698092.781770548	3973758.91161696	4671851.69338751
TCGA-50-5936-01A	15	127	-0.18098947626236	805491.671273709	3866360.0221138	4671851.69338751
TCGA-50-5939-01A	2	79	-0.637487351715792	107398.889503161	2631272.79282745	2738671.68233061
TCGA-50-5941-01A	7	171	0.0884191059724527	375896.113261064	5692141.14366754	6068037.25692861
TCGA-50-5942-01A	2	39	-0.936830220865584	107398.889503161	1557283.89779584	1664682.787299
TCGA-50-5944-01A	9	344	1.39804415850279	483295.002764226	9934397.27904241	10417692.2818066
TCGA-50-5946-01A	17	200	0.3802784033935	751792.226522129	5584742.25416438	6336534.48068651
TCGA-50-6590-01A	5	74	-0.652454495173282	268497.223757903	2577573.34807587	2846070.57183377
TCGA-50-6591-01A	16	356	1.54023202134894	751792.226522129	8108616.15748867	8860408.3840108
TCGA-50-6592-01A	2	185	0.155771251531156	107398.889503161	6443933.37018967	6605031.70444442
TCGA-50-6593-01A	11	86	-0.517750204055876	536994.447515806	2953469.46133693	3544163.35360432
TCGA-50-6594-01A	20	299	1.14360271972547	1073988.89503161	6819829.48345074	7947517.82323393
TCGA-50-6595-01A	1	62	-0.772191642833199	53699.4447515806	2147977.79006322	2201677.2348148
TCGA-50-6597-01A	7	517	2.67773492411815	375896.113261064	11760178.4005962	12136074.5138572
TCGA-50-6673-01A	8	175	0.125836964616177	375896.113261064	5853239.47792229	6229135.59118335
TCGA-50-7109-01A	17	302	1.14360271972547	805491.671273709	9021506.71826554	9826998.38953925
TCGA-50-8457-01A	2	22	-1.06405094025425	107398.889503161	751792.226522129	859191.11602529
TCGA-50-8459-01A	0	31	-1.01166593815303	0	1181387.78453477	1181387.78453477
TCGA-50-8460-01A	8	65	-0.697355925545751	429595.558012645	2309076.12431797	2738671.68233061
TCGA-51-4079-01A	9	292	0.329761616274374	483295.002764226	7571621.70997287	8054916.71273709
TCGA-51-4080-01A	3	1172	4.83670874273626	161098.334254742	35334234.64654	35495332.9807948
TCGA-51-4081-01A	27	157	-0.273571122622697	1181387.78453477	3651562.24310748	4832950.02764225
TCGA-51-6867-01A	19	327	0.561812669696325	1020289.45028003	8645610.60500448	9665900.05528451
TCGA-52-7622-01A	11	124	-0.526248936348821	590693.892267387	3866360.0221138	4457053.91438119
TCGA-52-7809-01A	10	241	0.071927112472207	536994.447515806	6605031.70444442	7142026.15196022
TCGA-52-7810-01A	16	373	0.783550342966189	751792.226522129	8323413.93649499	9075206.16301712
TCGA-52-7811-01A	4	79	-0.794396820303075	214797.779006322	2470174.45857271	2684972.23757903
TCGA-52-7812-01A	11	138	-0.454055275284214	590693.892267387	3544163.35360432	4134857.24587171
TCGA-53-7624-01A	19	326	1.33817558467283	1020289.45028003	7840118.93373077	8860408.3840108
TCGA-53-7626-01A	11	77	-0.585102349614579	590693.892267387	2684972.23757903	3275666.12984642
TCGA-53-7813-01A	10	56	-0.749740927646964	483295.002764226	1933180.0110569	2416475.01382113
TCGA-53-A4EZ-01A	15	267	0.866710565761911	805491.671273709	7034627.26245706	7840118.93373077
TCGA-55-1592-01A	15	449	2.22872062039346	751792.226522129	8860408.3840108	9612200.61053293
TCGA-55-1594-01A	19	335	1.40552773023154	1020289.45028003	8377113.38124658	9451102.27627819
TCGA-55-1595-01A	16	409	1.93686132297242	751792.226522129	8967807.27351396	9773298.94478767
TCGA-55-1596-01A	24	188	0.342860544749776	1181387.78453477	4886649.47239384	6068037.25692861
TCGA-55-5899-01A	21	315	1.27082343911413	966590.005528451	8699310.04975606	9665900.05528451
TCGA-55-6543-01A	9	45	-0.839543788391902	429595.558012645	1396185.5635411	1825781.12155374
TCGA-55-6642-01A	1	101	-0.480332345412152	53699.4447515806	2953469.46133693	3007168.90608851
TCGA-55-6712-01A	9	233	0.56736769661212	483295.002764226	6980927.81770548	7464222.82046971
TCGA-55-6968-01A	10	207	0.3802784033935	536994.447515806	6497632.81494125	7034627.26245706
TCGA-55-6969-01A	3	113	-0.375562341209725	161098.334254742	4081157.80112013	4242256.13537487
TCGA-55-6970-01A	8	75	-0.622520208258303	375896.113261064	2147977.79006322	2523873.90332429
TCGA-55-6971-01A	1	148	-0.128604474161146	53699.4447515806	3705261.68785906	3758961.13261064
TCGA-55-6972-01A	12	245	0.679621272543292	590693.892267387	6873528.92820232	7464222.82046971
TCGA-55-6975-01A	3	126	-0.278275908736042	161098.334254742	4081157.80112013	4242256.13537487
TCGA-55-6978-01A	0	54	-0.839543788391902	0	2040578.90056006	2040578.90056006
TCGA-55-6979-01A	2	72	-0.689872353817006	107398.889503161	2523873.90332429	2631272.79282745
TCGA-55-6980-01A	12	66	-0.659938066902027	644393.337018967	2309076.12431797	2953469.46133693
TCGA-55-6981-01A	13	98	-0.412980199853449	698092.781770548	2792371.12708219	3490463.90885274
TCGA-55-6982-01A	5	156	-0.0388016134162088	268497.223757903	4188556.69062329	4457053.91438119
TCGA-55-6983-01A	1	35	-0.974248079509308	53699.4447515806	1073988.89503161	1127688.33978319
TCGA-55-6984-01A	6	102	-0.435430915039683	322196.668509484	3114567.79559168	3436764.46410116
TCGA-55-6985-01A	6	66	-0.704839497274496	268497.223757903	2040578.90056006	2309076.12431797
TCGA-55-6986-01A	2	32	-0.989215222966798	107398.889503161	1342486.11878952	1449885.00829268
TCGA-55-6987-01A	2	83	-0.607553064800813	107398.889503161	2953469.46133693	3060868.35084009
TCGA-55-7227-01A	3	16	-1.10146879889797	161098.334254742	859191.11602529	1020289.45028003
TCGA-55-7281-01A	14	52	-0.749740927646964	698092.781770548	1772081.67680216	2470174.45857271
TCGA-55-7283-01A	8	123	-0.263308765278553	429595.558012645	4564452.80388435	4994048.361897
TCGA-55-7284-01B	0	33	-0.996698794695543	0	966590.005528451	966590.005528451
TCGA-55-7570-01A	8	120	-0.285759480464787	429595.558012645	3920059.46686538	4349655.02487803
TCGA-55-7573-01A	12	109	-0.338144482566001	644393.337018967	3329365.574598	3973758.91161696
TCGA-55-7574-01A	1	75	-0.674905210359516	53699.4447515806	2577573.34807587	2631272.79282745
TCGA-55-7576-01A	9	292	1.00889842860806	483295.002764226	8914107.82876238	9397402.83152661
TCGA-55-7724-01A	0	44	-0.91437950567935	0	1664682.787299	1664682.787299
TCGA-55-7725-01A	5	60	-0.757224499375709	268497.223757903	2362775.56906955	2631272.79282745
TCGA-55-7726-01A	11	72	-0.622520208258303	483295.002764226	2416475.01382113	2899770.01658535
TCGA-55-7727-01A	6	114	-0.345628054294745	268497.223757903	3490463.90885274	3812660.57736222
TCGA-55-7728-01A	1	56	-0.817093073205667	53699.4447515806	1772081.67680216	1825781.12155374
TCGA-55-7815-01A	4	78	-0.630003779987048	214797.779006322	2255376.67956639	2470174.45857271
TCGA-55-7903-01A	10	171	0.110869821158687	536994.447515806	5799540.03317071	6336534.48068651
TCGA-55-7907-01A	11	159	0.0285505321424943	536994.447515806	5262545.5856549	5853239.47792229
TCGA-55-7910-01A	13	275	0.91161199613438	644393.337018967	7517922.26522129	8162315.60224025
TCGA-55-7911-01A	4	45	-0.876961647035626	214797.779006322	1879480.56630532	2094278.34531164
TCGA-55-7913-01B	7	149	-0.0762194720599328	375896.113261064	3866360.0221138	4242256.13537487
TCGA-55-7914-01A	7	107	-0.390529484667214	375896.113261064	2899770.01658535	3275666.12984642
TCGA-55-7994-01A	20	227	0.604785555255844	1020289.45028003	6497632.81494125	7517922.26522129
TCGA-55-7995-01A	9	239	0.612269126984588	429595.558012645	6766130.03869916	7195725.5967118
TCGA-55-8085-01A	3	284	0.904128424405635	161098.334254742	9988096.72379399	10149195.0580487
TCGA-55-8087-01A	4	62	-0.749740927646964	214797.779006322	2362775.56906955	2577573.34807587
TCGA-55-8089-01A	2	77	-0.652454495173282	107398.889503161	2470174.45857271	2577573.34807587
TCGA-55-8090-01A	1	46	-0.891928790493115	53699.4447515806	1235087.22928635	1288786.67403793
TCGA-55-8091-01A	15	58	-0.697355925545751	805491.671273709	1557283.89779584	2362775.56906955
TCGA-55-8092-01A	9	178	0.155771251531156	483295.002764226	5208846.14090332	5692141.14366754
TCGA-55-8094-01A	23	356	1.59261702345016	1073988.89503161	7303124.48621496	8377113.38124658
TCGA-55-8096-01A	5	103	-0.435430915039683	268497.223757903	2738671.68233061	3007168.90608851
TCGA-55-8097-01A	8	60	-0.734773784189475	429595.558012645	2147977.79006322	2577573.34807587
TCGA-55-8203-01A	8	63	-0.71232306900324	429595.558012645	1879480.56630532	2309076.12431797
TCGA-55-8204-01A	8	90	-0.510266632327131	429595.558012645	2147977.79006322	2577573.34807587
TCGA-55-8205-01A	4	71	-0.682388782088261	161098.334254742	2577573.34807587	2738671.68233061
TCGA-55-8206-01A	4	81	-0.607553064800813	214797.779006322	2147977.79006322	2362775.56906955
TCGA-55-8207-01A	17	70	-0.592585921343324	912890.56077687	1933180.0110569	2846070.57183377
TCGA-55-8208-01A	0	56	-0.824576644934412	0	2147977.79006322	2147977.79006322
TCGA-55-8299-01A	0	20	-1.09398522716922	0	912890.56077687	912890.56077687
TCGA-55-8301-01A	2	53	-0.832060216663157	107398.889503161	1449885.00829268	1557283.89779584
TCGA-55-8302-01A	6	63	-0.72729021246073	322196.668509484	2040578.90056006	2362775.56906955
TCGA-55-8505-01A	0	48	-0.884445218764371	0	1772081.67680216	1772081.67680216
TCGA-55-8506-01A	7	325	1.24088915219915	322196.668509484	10417692.2818066	10739888.9503161
TCGA-55-8507-01A	16	286	1.01638200033681	859191.11602529	8806708.93925922	9665900.05528451
TCGA-55-8508-01A	8	85	-0.547684490970855	429595.558012645	2684972.23757903	3114567.79559168
TCGA-55-8510-01A	2	99	-0.487815917140897	107398.889503161	2953469.46133693	3060868.35084009
TCGA-55-8511-01A	2	270	0.791874848474463	107398.889503161	8914107.82876238	9021506.71826554
TCGA-55-8512-01A	8	93	-0.487815917140897	429595.558012645	3275666.12984642	3705261.68785906
TCGA-55-8513-01A	0	23	-1.07153451198299	0	1073988.89503161	1073988.89503161
TCGA-55-8514-01A	26	133	-0.0537687568736984	1396185.5635411	3544163.35360432	4940348.91714542
TCGA-55-8614-01A	14	121	-0.233374478363574	698092.781770548	3007168.90608851	3705261.68785906
TCGA-55-8615-01A	17	322	1.29327415430036	912890.56077687	9665900.05528451	10632490.060813
TCGA-55-8616-01A	13	89	-0.480332345412152	590693.892267387	2523873.90332429	3114567.79559168
TCGA-55-8619-01A	0	37	-0.966764507780563	0	1503584.45304426	1503584.45304426
TCGA-55-8620-01A	11	240	0.634719842170823	590693.892267387	7303124.48621496	7893818.37848235
TCGA-55-8621-01A	0	25	-1.0565673685255	0	1073988.89503161	1073988.89503161
TCGA-55-A48X-01A	0	43	-0.921863077408095	0	1342486.11878952	1342486.11878952
TCGA-55-A48Y-01A	4	251	0.664654129085802	214797.779006322	9558501.16578135	9773298.94478767
TCGA-55-A48Z-01A	16	134	-0.121120902432402	805491.671273709	3436764.46410116	4242256.13537487
TCGA-55-A490-01A	17	317	1.25585629565664	805491.671273709	9397402.83152661	10202894.5028003
TCGA-55-A491-01A	18	165	0.125836964616177	859191.11602529	4725551.13813909	5584742.25416438
TCGA-55-A492-01A	7	60	-0.74225735591822	375896.113261064	1342486.11878952	1718382.23205058
TCGA-55-A493-01A	2	78	-0.644970923444537	107398.889503161	2684972.23757903	2792371.12708219
TCGA-55-A494-01A	11	91	-0.480332345412152	483295.002764226	2631272.79282745	3114567.79559168
TCGA-55-A4DF-01A	16	230	0.597301983527099	805491.671273709	5316245.03040648	6121736.70168019
TCGA-55-A4DG-01A	18	149	0.00609981695625995	751792.226522129	3866360.0221138	4618152.24863593
TCGA-55-A57B-01A	8	54	-0.779675214561944	429595.558012645	1718382.23205058	2147977.79006322
TCGA-56-1622-01A	25	325	0.582439430000498	1181387.78453477	6927228.3729539	8108616.15748867
TCGA-56-5897-01A	2	64	-0.882060551595812	107398.889503161	2040578.90056006	2147977.79006322
TCGA-56-5898-01A	14	224	0.00489014148364353	751792.226522129	6390233.92543809	7142026.15196022
TCGA-56-6545-01A	9	267	0.200844364373291	483295.002764226	7195725.5967118	7679020.59947603
TCGA-56-6546-01A	4	58	-0.902687311899986	214797.779006322	1664682.787299	1879480.56630532
TCGA-56-7221-01A	11	120	-0.546875696652995	590693.892267387	3705261.68785906	4295955.58012645
TCGA-56-7222-01A	21	95	-0.624226047793645	966590.005528451	2631272.79282745	3597862.7983559
TCGA-56-7223-01A	25	337	0.644319710913019	1127688.33978319	7571621.70997287	8699310.04975606
TCGA-56-7579-01A	14	228	0.0255169017878169	751792.226522129	5906938.92267387	6658731.149196
TCGA-56-7580-01A	13	115	-0.562345766881125	644393.337018967	3168267.24034326	3812660.57736222
TCGA-56-7582-01A	23	88	-0.650009498173862	1181387.78453477	2470174.45857271	3705261.68785906
TCGA-56-7730-01A	27	264	0.278194715513941	1181387.78453477	6282835.03593493	7464222.82046971
TCGA-56-7731-01A	2	33	-1.04191794395316	107398.889503161	1342486.11878952	1449885.00829268
TCGA-56-7822-01A	13	93	-0.675792948554078	644393.337018967	2577573.34807587	3221966.68509484
TCGA-56-7823-01B	21	252	0.185374294145161	1127688.33978319	5638441.69891596	6766130.03869916
TCGA-56-8082-01A	19	145	-0.376704924143564	859191.11602529	3651562.24310748	4510753.35913277
TCGA-56-8083-01A	12	159	-0.340608093611261	536994.447515806	4027458.35636855	4564452.80388435
TCGA-56-8201-01A	1	77	-0.820180270683292	53699.4447515806	2846070.57183377	2899770.01658535
TCGA-56-8304-01A	18	101	-0.608755977565515	912890.56077687	2631272.79282745	3544163.35360432
TCGA-56-8305-01A	8	145	-0.433428514980041	429595.558012645	4725551.13813909	5155146.69615174
TCGA-56-8307-01A	11	78	-0.763456679846815	483295.002764226	2362775.56906955	2846070.57183377
TCGA-56-8308-01A	11	246	0.102867252928467	590693.892267387	6658731.149196	7249425.04146338
TCGA-56-8309-01A	3	42	-0.990351043192722	161098.334254742	1664682.787299	1825781.12155374
TCGA-56-8503-01A	0	83	-0.794396820303075	0	2953469.46133693	2953469.46133693
TCGA-56-8504-01A	11	136	-0.464368655436301	590693.892267387	4457053.91438119	5047747.80664858
TCGA-56-8622-01A	10	143	-0.433428514980041	429595.558012645	4349655.02487803	4779250.58289067
TCGA-56-8623-01A	0	22	-1.10895491494172	0	1020289.45028003	1020289.45028003
TCGA-56-8624-01A	10	57	-0.876903861519769	483295.002764226	1879480.56630532	2362775.56906955
TCGA-56-8625-01A	6	230	-0.00542323866844317	322196.668509484	5369944.47515806	5692141.14366754
TCGA-56-8626-01A	12	178	-0.242630982166437	536994.447515806	5262545.5856549	5799540.03317071
TCGA-56-8628-01A	4	378	0.747453512433886	214797.779006322	11599080.0663414	11813877.8453477
TCGA-56-8629-01A	22	320	0.541185909392152	1073988.89503161	7840118.93373077	8914107.82876238
TCGA-56-A49D-01A	23	284	0.360701756730634	1235087.22928635	7034627.26245706	8269714.49174341
TCGA-56-A4BW-01A	17	257	0.190530984221204	859191.11602529	5745840.58841913	6605031.70444442
TCGA-56-A4BX-01A	24	303	0.463835558251501	1181387.78453477	7249425.04146338	8430812.82599816
TCGA-56-A4BY-01A	9	169	-0.304511263078957	483295.002764226	3705261.68785906	4188556.69062329
TCGA-56-A4ZJ-01A	1	40	-1.0109778034969	53699.4447515806	1449885.00829268	1503584.45304426
TCGA-56-A4ZK-01A	6	213	-0.0930869699611801	322196.668509484	5692141.14366754	6014337.81217703
TCGA-56-A5DR-01A	12	110	-0.593285907337385	536994.447515806	2899770.01658535	3436764.46410116
TCGA-56-A5DS-01A	4	33	-1.03160456380107	214797.779006322	1020289.45028003	1235087.22928635
TCGA-56-A62T-01A	14	148	-0.387018304295651	751792.226522129	2953469.46133693	3705261.68785906
TCGA-57-1582-01A	9	618	0.564576046651646	429595.558012645	15733937.3122131	16163532.8702258
TCGA-57-1583-01A	13	711	0.89881069589325	644393.337018967	16593128.4282384	17237521.7652574
TCGA-57-1584-01A	16	196	-0.865396937217071	751792.226522129	4242256.13537487	4994048.361897
TCGA-57-1585-01A	4	525	0.226895679376624	161098.334254742	13532260.0773983	13693358.4116531
TCGA-57-1586-01A	22	642	0.692067613888134	966590.005528451	14767347.3066847	15733937.3122131
TCGA-57-1992-01A	34	318	-0.382996412538468	1718382.23205058	7142026.15196022	8860408.3840108
TCGA-57-1993-01A	14	568	0.409518735147809	536994.447515806	14982145.085691	15519139.5332068
TCGA-57-1994-01A	14	435	-0.048761763296864	483295.002764226	10578790.6160614	11062085.6188256
TCGA-58-8386-01A	15	277	0.283351405589984	751792.226522129	7195725.5967118	7947517.82323393
TCGA-58-8387-01A	14	174	-0.252944362318524	751792.226522129	4940348.91714542	5692141.14366754
TCGA-58-8388-01A	11	65	-0.830493650835379	536994.447515806	2094278.34531164	2631272.79282745
TCGA-58-8390-01A	23	212	-0.0105799287444865	1127688.33978319	5316245.03040648	6443933.37018967
TCGA-58-8391-01A	16	251	0.154434153688901	805491.671273709	6175436.14643177	6980927.81770548
TCGA-58-8392-01A	16	370	0.768080272738059	859191.11602529	9128905.6077687	9988096.72379399
TCGA-58-8393-01A	2	82	-0.789240130227032	107398.889503161	2738671.68233061	2846070.57183377
TCGA-58-A46J-01A	2	70	-0.851120411139552	107398.889503161	2094278.34531164	2201677.2348148
TCGA-58-A46K-01A	13	195	-0.149810560797657	698092.781770548	5692141.14366754	6390233.92543809
TCGA-58-A46L-01A	11	321	0.489619008631718	590693.892267387	8591911.1602529	9182605.05252028
TCGA-58-A46M-01A	13	368	0.742296822357842	644393.337018967	8806708.93925922	9451102.27627819
TCGA-58-A46N-01A	32	208	0.0152035216357302	1664682.787299	4618152.24863593	6282835.03593493
TCGA-59-2348-01A	6	519	0.213112807242949	268497.223757903	13210063.4088888	13478560.6326467
TCGA-59-2349-01A	2	44	-1.43738613076456	107398.889503161	1557283.89779584	1664682.787299
TCGA-59-2350-01A	32	225	-0.710339625713235	1664682.787299	6121736.70168019	7786419.48897919
TCGA-59-2351-01A	13	268	-0.627642392911188	698092.781770548	6873528.92820232	7571621.70997287
TCGA-59-2352-01A	9	449	-0.0177503009960966	429595.558012645	10739888.9503161	11169484.5083288
TCGA-59-2354-01A	9	203	-0.865396937217071	429595.558012645	5584742.25416438	6014337.81217703
TCGA-59-2355-01A	11	208	-0.841276910983141	536994.447515806	5638441.69891596	6175436.14643177
TCGA-59-2363-01A	23	580	0.4818788138496	1127688.33978319	12941566.1851309	14069254.5249141
TCGA-59-2372-01A	25	330	-0.372659258438212	1127688.33978319	7679020.59947603	8806708.93925922
TCGA-59-A5PD-01A	17	460	0.0477183416388567	805491.671273709	10471391.7265582	11276883.3978319
TCGA-5B-A90C-01A	10	810	3.35440779384285	429595.558012645	21318679.5663775	21748275.1243901
TCGA-5C-A9VG-01A	5	59	-0.648272876115892	268497.223757903	2147977.79006322	2416475.01382113
TCGA-5C-A9VH-01A	11	24	-0.932328137317404	429595.558012645	912890.56077687	1342486.11878952
TCGA-5C-AAPD-01A	12	103	-0.148727416761509	644393.337018967	3275666.12984642	3920059.46686538
TCGA-5G-A9ZZ-01A	5	44	0.257518262390639	268497.223757903	1342486.11878952	1610983.34254742
TCGA-5K-AAAP-01A	0	47	0.18840080668406	0	1825781.12155374	1825781.12155374
TCGA-5L-AAT0-01A	3	47	-0.85488561284171	161098.334254742	1825781.12155374	1986879.45580848
TCGA-5L-AAT1-01A	4	38	-0.896371607441854	214797.779006322	1396185.5635411	1610983.34254742
TCGA-5M-AAT4-01A	12	210	0.879311311669112	644393.337018967	6282835.03593493	6927228.3729539
TCGA-5M-AAT6-01A	2	21	-1.01279474488275	107398.889503161	590693.892267387	698092.781770548
TCGA-5M-AATE-01A	22	138	0.289810932240894	912890.56077687	3920059.46686538	4832950.02764225
TCGA-5N-A9KI-01A	11	138	-0.355663971231604	590693.892267387	3758961.13261064	4349655.02487803
TCGA-5N-A9KM-01A	12	127	-0.412554815868759	644393.337018967	3920059.46686538	4564452.80388435
TCGA-5P-A9JU-01A	7	50	-0.138747313371471	375896.113261064	1772081.67680216	2147977.79006322
TCGA-5P-A9JV-01A	2	63	-0.00534749280710606	107398.889503161	2577573.34807587	2684972.23757903
TCGA-5P-A9JW-01A	2	41	-0.372196999359111	107398.889503161	1557283.89779584	1664682.787299
TCGA-5P-A9JY-01A	9	44	-0.205447223653654	483295.002764226	1396185.5635411	1879480.56630532
TCGA-5P-A9JZ-01A	2	239	2.92944855960893	107398.889503161	5853239.47792229	5960638.36742545
TCGA-5P-A9K0-01A	7	39	-0.322172066647474	375896.113261064	1396185.5635411	1772081.67680216
TCGA-5P-A9K2-01A	7	42	-0.272147133935837	375896.113261064	1503584.45304426	1879480.56630532
TCGA-5P-A9K3-01A	9	65	0.144727305327805	483295.002764226	2255376.67956639	2738671.68233061
TCGA-5P-A9K4-01A	13	39	-0.2221222012242	536994.447515806	1449885.00829268	1986879.45580848
TCGA-5P-A9K6-01A	7	47	-0.188772246083108	322196.668509484	1503584.45304426	1825781.12155374
TCGA-5P-A9K8-01A	6	27	-0.538946775064567	322196.668509484	1073988.89503161	1396185.5635411
TCGA-5P-A9K9-01A	24	110	1.14522595956054	1288786.67403793	2846070.57183377	4134857.24587171
TCGA-5P-A9KA-01A	1	23	-0.689021573199478	53699.4447515806	859191.11602529	912890.56077687
TCGA-5P-A9KC-01A	5	22	-0.638996640487841	268497.223757903	859191.11602529	1127688.33978319
TCGA-5P-A9KE-01A	4	32	-0.48892184235293	214797.779006322	1020289.45028003	1235087.22928635
TCGA-5P-A9KF-01A	0	33	-0.538946775064567	0	751792.226522129	751792.226522129
TCGA-5P-A9KH-01A	32	79	0.761701475437995	1718382.23205058	2523873.90332429	4242256.13537487
TCGA-5R-AA1C-01A	13	51	-0.648272876115892	536994.447515806	1664682.787299	2201677.2348148
TCGA-5R-AA1D-01A	2	21	-1.04986824540079	107398.889503161	698092.781770548	805491.671273709
TCGA-5R-AAAM-01A	3	71	-0.550322786046405	161098.334254742	2309076.12431797	2470174.45857271
TCGA-5S-A9Q8-01A	2	21	-0.718619154114025	107398.889503161	805491.671273709	912890.56077687
TCGA-5T-A9QA-01A	14	217	0.0837350149865288	698092.781770548	5423643.91990964	6121736.70168019
TCGA-5U-AB0D-01A	8	243	7.23838128875505	429595.558012645	7840118.93373077	8269714.49174341
TCGA-5U-AB0E-01A	4	15	-0.779243573208037	214797.779006322	590693.892267387	805491.671273709
TCGA-5U-AB0F-01A	0	36	-0.191745199702121	0	1772081.67680216	1772081.67680216
TCGA-5V-A9RR-01A	0	42	0.0156071674176145	0	1610983.34254742	1610983.34254742
TCGA-5X-AA5U-01A	19	308	-0.469139363373933	751792.226522129	8162315.60224025	8914107.82876238
TCGA-60-2695-01A	30	225	0.0925538727763804	1396185.5635411	5208846.14090332	6605031.70444442
TCGA-60-2696-01A	12	64	-0.830493650835379	644393.337018967	2201677.2348148	2846070.57183377
TCGA-60-2697-01A	0	34	-1.0470746340292	0	1449885.00829268	1449885.00829268
TCGA-60-2698-01A	9	294	0.340074996426461	483295.002764226	8162315.60224025	8645610.60500448
TCGA-60-2703-01A	4	129	-0.536562316500908	214797.779006322	3221966.68509484	3436764.46410116
TCGA-60-2704-01A	1	106	-0.670636258478035	53699.4447515806	2792371.12708219	2846070.57183377
TCGA-60-2706-01A	12	400	0.902154214715186	644393.337018967	11491681.1768383	12136074.5138572
TCGA-60-2707-01A	11	184	-0.21684753178622	590693.892267387	6551332.25969283	7142026.15196022
TCGA-60-2708-01A	23	185	-0.149810560797657	1181387.78453477	4242256.13537487	5423643.91990964
TCGA-60-2709-01A	1	69	-0.861433791291639	53699.4447515806	2470174.45857271	2523873.90332429
TCGA-60-2710-01A	15	276	0.278194715513941	805491.671273709	6766130.03869916	7571621.70997287
TCGA-60-2711-01A	24	280	0.345231686502504	1073988.89503161	6766130.03869916	7840118.93373077
TCGA-60-2712-01A	11	85	-0.727359849314512	536994.447515806	2684972.23757903	3221966.68509484
TCGA-60-2713-01A	11	220	-0.0312066890486599	590693.892267387	5531042.8094128	6121736.70168019
TCGA-60-2714-01A	11	197	-0.149810560797657	536994.447515806	4295955.58012645	4832950.02764225
TCGA-60-2715-01A	1	105	-0.675792948554078	53699.4447515806	3436764.46410116	3490463.90885274
TCGA-60-2716-01A	0	38	-1.02644787372503	0	1503584.45304426	1503584.45304426
TCGA-60-2719-01A	32	289	0.432895417795241	1396185.5635411	5208846.14090332	6605031.70444442
TCGA-60-2720-01A	2	116	-0.613912667641558	107398.889503161	3973758.91161696	4081157.80112013
TCGA-60-2721-01A	12	120	-0.541719006576951	590693.892267387	3651562.24310748	4242256.13537487
TCGA-60-2722-01A	19	372	0.793863723118276	1020289.45028003	9397402.83152661	10417692.2818066
TCGA-60-2723-01A	17	269	0.252411265133724	859191.11602529	6605031.70444442	7464222.82046971
TCGA-60-2724-01A	12	134	-0.469525345512344	590693.892267387	4295955.58012645	4886649.47239384
TCGA-60-2725-01A	3	94	-0.722203159238468	161098.334254742	2792371.12708219	2953469.46133693
TCGA-60-2726-01A	21	232	0.0822404926242937	966590.005528451	5799540.03317071	6766130.03869916
TCGA-61-1721-01A	0	43	-1.44772328486481	0	1503584.45304426	1503584.45304426
TCGA-61-1722-01A	10	405	-0.165916176433096	536994.447515806	10847287.8398193	11384282.2873351
TCGA-61-1724-01A	21	687	0.843679207358553	1020289.45028003	14176653.4144173	15196942.8646973
TCGA-61-1725-01A	13	232	-0.751688242114258	644393.337018967	4242256.13537487	4886649.47239384
TCGA-61-1727-01A	4	512	0.182101344942182	214797.779006322	12726768.4061246	12941566.1851309
TCGA-61-1728-01A	8	490	0.120078420340647	429595.558012645	12243473.4033604	12673068.961373
TCGA-61-1730-01A	18	272	-0.596630930610421	966590.005528451	4188556.69062329	5155146.69615174
TCGA-61-1733-01A	33	254	-0.606968084710677	1449885.00829268	6068037.25692861	7517922.26522129
TCGA-61-1734-01B	12	291	-0.551836596175979	536994.447515806	7142026.15196022	7679020.59947603
TCGA-61-1736-01B	10	363	-0.310636333836677	483295.002764226	9719599.50003609	10202894.5028003
TCGA-61-1737-01A	14	275	-0.600076648643839	644393.337018967	5960638.36742545	6605031.70444442
TCGA-61-1738-01A	2	503	0.144198446574577	107398.889503161	13800757.3011562	13908156.1906594
TCGA-61-1740-01A	10	528	0.257907141677391	536994.447515806	12619369.5166214	13156363.9641373
TCGA-61-1741-01A	14	352	-0.334756360070607	698092.781770548	7571621.70997287	8269714.49174341
TCGA-61-1743-01A	11	677	0.774764846690181	536994.447515806	17989313.9917795	18526308.4392953
TCGA-61-1895-01A	11	229	-0.768916832281351	536994.447515806	5477343.36466122	6014337.81217703
TCGA-61-1899-01A	14	529	0.275135731844484	590693.892267387	13424861.1878952	14015555.0801625
TCGA-61-1900-01A	9	337	-0.403670720738979	429595.558012645	6658731.149196	7088326.70720864
TCGA-61-1901-01A	8	177	-0.958431324119373	429595.558012645	3490463.90885274	3920059.46686538
TCGA-61-1903-01A	10	357	-0.331310642037189	429595.558012645	6819829.48345074	7249425.04146338
TCGA-61-1904-01A	20	240	-0.700002471612979	912890.56077687	5423643.91990964	6336534.48068651
TCGA-61-1906-01A	25	283	-0.534608006008886	1288786.67403793	6336534.48068651	7625321.15472445
TCGA-61-1907-01A	18	329	-0.400225002705561	966590.005528451	6980927.81770548	7947517.82323393
TCGA-61-1910-01A	7	469	0.0442726236054381	322196.668509484	9236304.49727187	9612200.61053293
TCGA-61-1911-01A	6	455	-0.00741314689584081	322196.668509484	11974976.1796025	12297172.848112
TCGA-61-1913-01A	15	483	0.120078420340647	751792.226522129	11276883.3978319	12028675.6243541
TCGA-61-1914-01A	12	250	-0.693111035546142	644393.337018967	5208846.14090332	5906938.92267387
TCGA-61-1915-01A	19	306	-0.47603079944077	859191.11602529	5745840.58841913	6605031.70444442
TCGA-61-1916-01A	2	497	0.123524138374066	107398.889503161	14498850.0829268	14606248.9724299
TCGA-61-1917-01A	3	841	1.31229685990348	161098.334254742	21050182.3426196	21211280.6768743
TCGA-61-1918-01A	1	1021	1.92563466985199	53699.4447515806	31145677.9559168	31253076.8454199
TCGA-61-1919-01A	15	421	-0.0935560977313057	751792.226522129	10954686.7293224	11706478.9558446
TCGA-61-1995-01A	25	90	-1.19963158645868	1288786.67403793	2362775.56906955	3651562.24310748
TCGA-61-1998-01A	7	243	-0.734459651947165	375896.113261064	6819829.48345074	7195725.5967118
TCGA-61-2000-01A	3	885	1.4639084533739	161098.334254742	25775733.4807587	25936831.8150134
TCGA-61-2002-01A	10	220	-0.803374012615537	536994.447515806	5477343.36466122	6014337.81217703
TCGA-61-2003-01A	14	226	-0.768916832281351	698092.781770548	5208846.14090332	5906938.92267387
TCGA-61-2008-01A	12	404	-0.162470458399678	644393.337018967	7893818.37848235	8538211.71550132
TCGA-61-2009-01A	12	182	-0.927419861818606	590693.892267387	4403354.46962961	4994048.361897
TCGA-61-2012-01A	16	453	0.020152597371508	698092.781770548	11760178.4005962	12458271.1823667
TCGA-61-2016-01A	24	221	-0.751688242114258	1235087.22928635	4940348.91714542	6175436.14643177
TCGA-61-2017-01A	1	67	-1.36158033402935	53699.4447515806	1664682.787299	1718382.23205058
TCGA-61-2018-01A	9	376	-0.269287717435654	375896.113261064	8538211.71550132	8914107.82876238
TCGA-61-2087-01A	25	412	-0.0901103796978871	1181387.78453477	7947517.82323393	9128905.6077687
TCGA-61-2088-01A	20	345	-0.338202078104026	859191.11602529	7679020.59947603	8538211.71550132
TCGA-61-2092-01A	0	263	-0.689665317512723	0	9021506.71826554	9021506.71826554
TCGA-61-2094-01A	9	185	-0.927419861818606	429595.558012645	5584742.25416438	6014337.81217703
TCGA-61-2095-01A	1	60	-1.38570036026328	53699.4447515806	2147977.79006322	2201677.2348148
TCGA-61-2096-01A	8	506	0.175209908875345	375896.113261064	12458271.1823667	12834167.2956278
TCGA-61-2097-01A	22	189	-0.86884265525049	1181387.78453477	4188556.69062329	5369944.47515806
TCGA-61-2098-01A	13	422	-0.0970018157647243	698092.781770548	10095495.6132972	10793588.3950677
TCGA-61-2101-01A	22	299	-0.489813671574444	1073988.89503161	6873528.92820232	7947517.82323393
TCGA-61-2102-01A	24	599	0.550793174517972	1020289.45028003	14122953.9696657	15143243.4199457
TCGA-61-2104-01A	16	341	-0.365767822371375	590693.892267387	6551332.25969283	7142026.15196022
TCGA-61-2109-01A	13	422	-0.0970018157647243	644393.337018967	8806708.93925922	9451102.27627819
TCGA-61-2110-01A	25	221	-0.748242524080839	1181387.78453477	4886649.47239384	6068037.25692861
TCGA-61-2111-01A	5	392	-0.227939101034631	268497.223757903	11384282.2873351	11652779.511093
TCGA-61-2113-01A	8	420	-0.121121841998655	429595.558012645	10202894.5028003	10632490.060813
TCGA-61-2612-01A	13	236	-0.737905369980583	590693.892267387	6336534.48068651	6927228.3729539
TCGA-61-2613-01A	7	305	-0.520825133875212	375896.113261064	9988096.72379399	10363992.8370551
TCGA-61-2614-01A	22	232	-0.72067677981349	1073988.89503161	6819829.48345074	7893818.37848235
TCGA-62-8394-01A	14	218	0.492531979324672	698092.781770548	5369944.47515806	6068037.25692861
TCGA-62-8395-01A	6	89	-0.532717347513365	268497.223757903	2846070.57183377	3114567.79559168
TCGA-62-8397-01A	8	94	-0.480332345412152	429595.558012645	2201677.2348148	2631272.79282745
TCGA-62-8398-01A	11	84	-0.532717347513365	590693.892267387	3168267.24034326	3758961.13261064
TCGA-62-8399-01A	17	102	-0.35311162602349	805491.671273709	2953469.46133693	3758961.13261064
TCGA-62-8402-01A	16	93	-0.427947343310938	805491.671273709	2470174.45857271	3275666.12984642
TCGA-62-A46O-01A	13	381	1.70487059938133	698092.781770548	8699310.04975606	9397402.83152661
TCGA-62-A46P-01A	10	114	-0.315693767379766	483295.002764226	3597862.7983559	4081157.80112013
TCGA-62-A46R-01A	15	75	-0.570135206157089	805491.671273709	2309076.12431797	3114567.79559168
TCGA-62-A46S-01A	8	206	0.357827688207265	429595.558012645	4671851.69338751	5101447.25140016
TCGA-62-A46U-01A	7	105	-0.405496628124704	375896.113261064	3221966.68509484	3597862.7983559
TCGA-62-A46V-01A	10	91	-0.487815917140897	536994.447515806	2684972.23757903	3221966.68509484
TCGA-62-A46Y-01A	7	56	-0.772191642833199	322196.668509484	1772081.67680216	2094278.34531164
TCGA-62-A470-01A	21	155	0.0734519625149631	1127688.33978319	4940348.91714542	6068037.25692861
TCGA-62-A471-01A	18	142	-0.0462851851449536	912890.56077687	3866360.0221138	4779250.58289067
TCGA-62-A472-01A	13	63	-0.674905210359516	644393.337018967	2523873.90332429	3168267.24034326
TCGA-63-5128-01A	21	345	0.664946471217192	912890.56077687	9290003.94202345	10202894.5028003
TCGA-63-5131-01A	16	311	0.463835558251501	859191.11602529	7732720.04422761	8591911.1602529
TCGA-63-6202-01A	7	156	-0.381861614219608	322196.668509484	5208846.14090332	5531042.8094128
[truncated: 8,637 more rows]
