# Supplementary material for: CNApp, a tool for the quantification of copy number alterations and integrative analysis revealing clinical implications
Source: eLife. 2020 Jan 15;9:e50267. doi: 10.7554/eLife.50267 (PMC7010409; doi:10.7554/eLife.50267)
Supplement: Figure 2—source data 1. [file elife-50267-fig2-data1.xlsx]

## Sheet: Franch-Exposito et al_Fig_2A-so
Source data 2: Broad, Focal and Global CNA scores across the pan-cancer cohort.
TCGA.project	BCS	FCS	GCS
GBM	10	120	-0.070181861538897
GBM	3	81	-0.586233848807148
GBM	2	55	-0.889133928290687
GBM	6	118	-0.137492990313017
GBM	11	103	-0.24967820493655
GBM	5	174	0.479525690116414
GBM	5	141	0.109314481858755
GBM	11	109	-0.18236707616243
GBM	2	266	1.47797410026586
GBM	5	122	-0.103837425925957
GBM	7	88	-0.462830112721262
GBM	5	127	-0.0477448186141905
GBM	5	102	-0.328207855173023
GBM	8	188	0.67024055497642
GBM	6	38	-1.03497470730128
GBM	3	74	-0.664763499043621
GBM	3	66	-0.754511670742447
GBM	4	61	-0.79938575659186
GBM	7	64	-0.732074627817741
GBM	7	178	0.546836818890533
GBM	5	126	-0.0589633400765438
GBM	6	87	-0.485267155645968
GBM	6	39	-1.02375618583893
GBM	6	89	-0.462830112721262
GBM	4	83	-0.552578284420088
GBM	1	32	-1.15837844338717
GBM	5	133	0.0195663101599292
GBM	12	87	-0.417956026871849
GBM	3	81	-0.586233848807148
GBM	8	43	-0.956445057064806
GBM	11	88	-0.417956026871849
GBM	4	54	-0.877915406828333
GBM	4	106	-0.294552290785963
GBM	8	37	-1.02375618583893
GBM	4	203	0.793644291062306
GBM	7	165	0.400996039879941
GBM	4	77	-0.619889413194208
GBM	15	259	1.54528522903998
GBM	5	17	-1.28178217947305
GBM	5	149	0.199062653557582
GBM	9	137	0.109314481858755
GBM	10	65	-0.687200541968328
GBM	12	192	0.759988726675246
GBM	4	121	-0.126274468850663
GBM	6	223	1.04045176323408
GBM	6	46	-0.945226535602453
GBM	2	62	-0.810604278054214
GBM	15	97	-0.272115247861256
GBM	3	87	-0.518922720033028
GBM	4	150	0.199062653557582
GBM	7	197	0.759988726675246
GBM	4	137	0.0532218745469891
GBM	6	157	0.300029346718761
GBM	17	200	0.905829505685838
GBM	0	69	-0.754511670742447
GBM	8	118	-0.11505594738831
GBM	24	101	-0.126274468850663
GBM	8	87	-0.462830112721262
GBM	8	156	0.311247868181115
GBM	8	152	0.266373782331701
GBM	7	174	0.50196273304112
GBM	4	98	-0.384300462484789
GBM	11	415	3.25050049131767
GBM	5	260	1.4443185358788
GBM	7	58	-0.79938575659186
GBM	10	261	1.51162966465292
GBM	4	474	3.83386360736004
GBM	1	917	8.77001305079549
GBM	4	379	2.76810406843648
GBM	5	230	1.1077628920082
GBM	3	174	0.457088647191707
GBM	6	122	-0.0926189044636036
GBM	10	136	0.109314481858755
GBM	2	47	-0.978882099989513
GBM	10	117	-0.103837425925957
GBM	8	81	-0.530141241495382
GBM	7	168	0.434651604267001
GBM	6	86	-0.496485677108322
GBM	1	225	1.00679619884702
GBM	6	66	-0.720856106355387
GBM	4	124	-0.0926189044636036
GBM	5	83	-0.541359762957735
GBM	6	68	-0.698419063430681
GBM	0	187	0.56927386181524
GBM	3	132	-0.0140892542271306
GBM	4	130	-0.0253077756894839
GBM	3	191	0.647803512051713
GBM	7	74	-0.619889413194208
GBM	13	157	0.378558996955234
GBM	4	59	-0.821822799516567
GBM	5	194	0.703896119363479
GBM	7	129	-0.00287073276477735
GBM	8	118	-0.11505594738831
OV	6	209	-0.855059783116816
OV	11	263	-0.651762419145118
OV	20	138	-1.05146571102168
OV	20	283	-0.551836596175979
OV	19	107	-1.16172868809107
OV	10	501	0.164872754775089
OV	18	468	0.0787298039396241
OV	12	243	-0.717231061780072
OV	19	211	-0.803374012615537
OV	20	246	-0.679328163412467
OV	15	571	0.423301607281484
OV	0	778	1.08487946969785
OV	25	268	-0.586293776510165
OV	26	147	-0.999779940520397
OV	23	454	0.0477183416388567
OV	4	628	0.581804636818739
OV	11	581	0.443975915481995
OV	11	192	-0.896408399517839
OV	18	418	-0.0935560977313057
OV	14	362	-0.300299179736422
OV	14	546	0.3337129384126
OV	19	715	0.933267876227436
OV	13	423	-0.0935560977313057
OV	32	252	-0.617305238810932
OV	0	2244	6.13630210668952
OV	15	670	0.764427692589925
OV	18	267	-0.613859520777514
OV	10	451	-0.00741314689584081
OV	17	533	0.299255758078414
OV	32	232	-0.686219599479304
OV	15	351	-0.334756360070607
OV	6	230	-0.782699704415025
OV	13	451	0.00292400720441498
OV	22	388	-0.183144766600189
OV	23	169	-0.934311297885443
OV	18	320	-0.431236465006328
OV	27	361	-0.258950563335398
OV	28	225	-0.724122497846909
OV	14	499	0.171764190841926
OV	21	358	-0.289962025636166
OV	18	394	-0.176253330533352
OV	9	365	-0.307190615803259
OV	22	397	-0.152133304299422
LUAD	18	128	-0.151055189347381
LUAD	8	77	-0.607553064800813
LUAD	12	124	-0.225890906634829
LUAD	2	191	0.200672681903625
LUAD	3	39	-0.929346649136839
LUAD	14	205	0.395245546850989
LUAD	9	238	0.604785555255844
LUAD	22	232	0.657170557357057
LUAD	9	357	1.49533059097647
LUAD	6	188	0.208156253632369
LUAD	8	259	0.754456989830739
LUAD	8	165	0.0510012473287287
LUAD	1	33	-0.989215222966798
LUAD	15	94	-0.427947343310938
LUAD	13	111	-0.315693767379766
LUAD	8	198	0.297959114377307
LUAD	11	120	-0.263308765278553
LUAD	4	84	-0.585102349614579
LUAD	13	270	0.874194137490656
LUAD	8	244	0.642203413899567
LUAD	9	135	-0.16602233280487
LUAD	8	68	-0.674905210359516
LUAD	4	198	0.268024827462328
LUAD	11	345	1.42049487368903
LUAD	4	107	-0.412980199853449
LUAD	11	273	0.881677709219401
LUAD	7	257	0.732006274644505
LUAD	0	190	0.17822196671739
LUAD	1	72	-0.697355925545751
LUAD	16	91	-0.442914486768428
LUAD	6	243	0.619752698713333
LUAD	17	237	0.657170557357057
LUAD	8	268	0.821809135389443
LUAD	7	254	0.709555559458271
GBM	0	22	-1.28178217947305
GBM	5	136	0.0532218745469891
GBM	5	114	-0.193585597624783
GBM	6	101	-0.328207855173023
GBM	6	74	-0.631107934656561
GBM	5	97	-0.384300462484789
GBM	7	74	-0.619889413194208
GBM	2	462	3.6768043068871
GBM	9	67	-0.675982020505974
GBM	2	49	-0.956445057064806
GBM	7	117	-0.137492990313017
GBM	5	71	-0.675982020505974
GBM	8	142	0.154188567708169
GBM	0	45	-1.02375618583893
GBM	0	54	-0.922789492677746
GBM	6	85	-0.507704198570675
GBM	0	115	-0.238459683474196
GBM	0	64	-0.810604278054214
GBM	5	123	-0.0926189044636036
GBM	5	102	-0.328207855173023
GBM	1	245	1.23116662809408
GBM	1	50	-0.956445057064806
GBM	6	147	0.187844132095228
GBM	6	47	-0.9340080141401
GBM	5	92	-0.440393069796555
GBM	18	90	-0.316989333710669
GBM	8	110	-0.204804119087136
GBM	4	200	0.759988726675246
GBM	4	81	-0.575015327344795
GBM	7	103	-0.294552290785963
GBM	8	108	-0.227241162011843
GBM	5	51	-0.90035244975304
GBM	0	45	-1.02375618583893
GBM	11	328	2.27448912409294
GBM	7	87	-0.474048634183615
GBM	0	46	-1.01253766437657
GBM	9	223	1.07410732762114
GBM	7	75	-0.608670891731855
GBM	4	71	-0.687200541968328
GBM	9	95	-0.361863419560082
GBM	11	146	0.232718217944642
GBM	7	136	0.0756589174716956
GBM	7	136	0.0756589174716956
GBM	3	80	-0.597452370269501
GBM	15	209	0.984359155922311
GBM	0	16	-1.34909330824717
GBM	5	79	-0.586233848807148
GBM	6	165	0.389777518417588
GBM	10	166	0.445870125729354
GBM	13	106	-0.193585597624783
GBM	7	119	-0.11505594738831
GBM	14	142	0.221499696482288
GBM	0	76	-0.675982020505974
GBM	6	107	-0.260896726398903
GBM	8	95	-0.373081941022436
GBM	5	42	-1.00131914291422
GBM	18	80	-0.429174548334202
GBM	8	51	-0.86669688536598
GBM	5	48	-0.9340080141401
GBM	6	56	-0.83304132097892
GBM	3	108	-0.283333769323609
GBM	15	118	-0.0365262971518372
GBM	3	129	-0.0477448186141905
GBM	5	83	-0.541359762957735
GBM	8	105	-0.260896726398903
GBM	8	111	-0.193585597624783
GBM	7	85	-0.496485677108322
GBM	5	152	0.232718217944642
GBM	0	21	-1.2930007009354
GBM	20	96	-0.227241162011843
GBM	4	117	-0.171148554700077
GBM	7	198	0.771207248137599
GBM	12	110	-0.159930033237723
GBM	3	145	0.131751524783462
GBM	0	56	-0.90035244975304
GBM	5	171	0.445870125729354
GBM	7	64	-0.732074627817741
GBM	7	80	-0.552578284420088
GBM	6	381	2.8129781542859
GBM	9	235	1.20872958516938
GBM	13	198	0.838518376911719
GBM	7	136	0.0756589174716956
GBM	3	84	-0.552578284420088
GBM	15	122	0.00834778869757593
GBM	4	65	-0.754511670742447
GBM	8	100	-0.316989333710669
GBM	5	71	-0.675982020505974
GBM	5	124	-0.0814003830012503
GBM	5	168	0.412214561342294
GBM	0	33	-1.15837844338717
GBM	9	89	-0.429174548334202
GBM	6	122	-0.0926189044636036
GBM	6	174	0.490744211578767
GBM	5	128	-0.0365262971518372
GBM	7	74	-0.619889413194208
GBM	6	91	-0.440393069796555
GBM	4	112	-0.227241162011843
GBM	8	132	0.0420033530846358
GBM	5	105	-0.294552290785963
GBM	8	93	-0.395518983947142
GBM	6	103	-0.305770812248316
GBM	8	65	-0.709637584893034
GBM	0	70	-0.743293149280094
GBM	4	122	-0.11505594738831
GBM	6	52	-0.877915406828333
GBM	8	183	0.614147947664653
GBM	16	115	-0.0589633400765438
GBM	13	327	2.28570764555529
GBM	7	67	-0.698419063430681
GBM	3	91	-0.474048634183615
GBM	5	366	2.63348181088824
GBM	6	170	0.445870125729354
GBM	4	111	-0.238459683474196
GBM	5	130	-0.0140892542271306
GBM	8	223	1.06288880615878
GBM	9	115	-0.137492990313017
GBM	5	134	0.0307848316222825
GBM	11	168	0.479525690116414
GBM	7	190	0.681459076438773
GBM	6	122	-0.0926189044636036
GBM	3	136	0.0307848316222825
GBM	3	146	0.142970046245815
GBM	1	89	-0.518922720033028
GBM	7	46	-0.9340080141401
GBM	16	353	2.61104476796354
GBM	3	87	-0.518922720033028
GBM	9	78	-0.552578284420088
GBM	0	34	-1.14715992192481
GBM	4	38	-1.05741175022599
GBM	2	42	-1.03497470730128
GBM	6	83	-0.530141241495382
GBM	7	75	-0.608670891731855
GBM	9	145	0.199062653557582
GBM	5	104	-0.305770812248316
GBM	5	148	0.187844132095228
GBM	18	315	2.20717799531882
GBM	6	86	-0.496485677108322
GBM	11	165	0.445870125729354
GBM	4	56	-0.855478363903627
GBM	6	114	-0.18236707616243
GBM	6	124	-0.070181861538897
GBM	1	183	0.53561829742818
GBM	6	91	-0.440393069796555
GBM	12	110	-0.159930033237723
GBM	8	116	-0.137492990313017
GBM	7	64	-0.732074627817741
GBM	5	38	-1.04619322876363
GBM	6	107	-0.260896726398903
GBM	2	90	-0.496485677108322
GBM	2	55	-0.889133928290687
GBM	6	76	-0.608670891731855
GBM	10	139	0.142970046245815
GBM	6	119	-0.126274468850663
GBM	8	113	-0.171148554700077
GBM	5	78	-0.597452370269501
GBM	8	193	0.726333162288186
GBM	4	56	-0.855478363903627
GBM	23	187	0.827299855449365
GBM	16	81	-0.440393069796555
GBM	2	26	-1.21447105069893
GBM	3	70	-0.709637584893034
GBM	4	70	-0.698419063430681
GBM	4	73	-0.664763499043621
GBM	3	55	-0.877915406828333
GBM	9	84	-0.485267155645968
GBM	7	111	-0.204804119087136
GBM	3	64	-0.776948713667154
GBM	7	125	-0.0477448186141905
GBM	3	108	-0.283333769323609
GBM	7	92	-0.417956026871849
GBM	6	64	-0.743293149280094
GBM	5	115	-0.18236707616243
GBM	4	148	0.176625610632875
GBM	4	178	0.513181254503474
GBM	6	41	-1.00131914291422
GBM	7	185	0.625366469127006
GBM	5	85	-0.518922720033028
GBM	7	107	-0.24967820493655
GBM	4	32	-1.12472287900011
GBM	2	330	2.19595947385647
GBM	16	109	-0.126274468850663
GBM	4	83	-0.552578284420088
GBM	6	119	-0.126274468850663
GBM	4	144	0.131751524783462
GBM	5	75	-0.631107934656561
GBM	7	295	1.85940382998587
GBM	3	131	-0.0253077756894839
GBM	6	96	-0.384300462484789
GBM	8	111	-0.193585597624783
GBM	16	71	-0.552578284420088
GBM	9	286	1.78087417974939
GBM	4	261	1.4443185358788
GBM	8	130	0.0195663101599292
GBM	1	68	-0.754511670742447
GBM	8	59	-0.776948713667154
GBM	6	64	-0.743293149280094
GBM	10	135	0.0980959603964022
GBM	6	132	0.0195663101599292
GBM	4	159	0.300029346718761
OV	14	392	-0.196927638733864
OV	25	209	-0.789591140481862
OV	16	268	-0.617305238810932
OV	7	531	0.257907141677391
OV	20	394	-0.169361894466515
OV	14	455	0.020152597371508
OV	27	373	-0.217601946934375
OV	9	295	-0.54839087814256
OV	4	69	-1.34435174386226
OV	3	914	1.56383427634304
OV	20	431	-0.0418703272300268
OV	7	596	0.4818788138496
OV	21	206	-0.813711166715792
OV	11	328	-0.42779074697291
OV	25	186	-0.86884265525049
OV	20	67	-1.2961116913944
OV	2	1373	3.14197313564876
OV	14	451	0.00636972523783358
OV	21	402	-0.138350432165747
OV	11	539	0.299255758078414
OV	16	632	0.636936125353437
OV	7	241	-0.741351088014002
OV	5	248	-0.724122497846909
OV	14	405	-0.152133304299422
OV	23	422	-0.0625446354305384
OV	12	512	0.209667089209531
OV	20	469	0.0890669580398799
OV	18	464	0.0649469318059497
OV	12	159	-1.00667137658723
OV	27	345	-0.314082051870096
OV	11	143	-1.06524858315535
OV	16	193	-0.875734091317327
OV	26	255	-0.627642392911188
OV	20	563	0.412964453181228
OV	8	476	0.0718383678727869
OV	13	258	-0.662099573245374
OV	40	281	-0.489813671574444
OV	1	287	-0.603522366677258
OV	18	327	-0.407116438772398
OV	21	449	0.0235983154049266
OV	13	322	-0.441573619106584
OV	23	392	-0.165916176433096
GBM	6	154	0.266373782331701
GBM	2	182	0.53561829742818
GBM	8	61	-0.754511670742447
GBM	12	230	1.18629254224467
GBM	5	69	-0.698419063430681
GBM	4	81	-0.575015327344795
GBM	8	50	-0.877915406828333
GBM	6	81	-0.552578284420088
GBM	4	82	-0.563796805882441
GBM	8	131	0.0307848316222825
GBM	6	191	0.681459076438773
GBM	6	61	-0.776948713667154
GBM	9	306	2.00524460899646
GBM	6	79	-0.575015327344795
GBM	4	66	-0.743293149280094
GBM	7	140	0.120533003321109
GBM	6	113	-0.193585597624783
GBM	6	121	-0.103837425925957
GBM	4	45	-0.978882099989513
GBM	3	147	0.154188567708169
GBM	9	202	0.838518376911719
GBM	7	161	0.356121954030528
GBM	6	111	-0.21602264054949
GBM	4	155	0.255155260869348
GBM	9	63	-0.720856106355387
GBM	6	129	-0.0140892542271306
GBM	5	110	-0.238459683474196
GBM	5	70	-0.687200541968328
GBM	11	86	-0.440393069796555
GBM	3	404	3.03734858353296
GBM	3	60	-0.821822799516567
GBM	7	133	0.0420033530846358
GBM	10	114	-0.137492990313017
GBM	2	211	0.860955419836425
GBM	5	86	-0.507704198570675
GBM	10	163	0.412214561342294
GBM	10	78	-0.541359762957735
GBM	8	41	-0.978882099989513
GBM	6	99	-0.350644898097729
GBM	4	66	-0.743293149280094
GBM	5	71	-0.675982020505974
GBM	6	79	-0.575015327344795
GBM	9	135	0.0868774389340489
GBM	13	434	3.48608944202709
GBM	6	1012	9.89186519703082
GBM	16	250	1.45553705734115
GBM	5	69	-0.698419063430681
GBM	9	101	-0.294552290785963
GBM	21	145	0.333684911105821
GBM	9	83	-0.496485677108322
GBM	21	155	0.445870125729354
GBM	12	161	0.412214561342294
GBM	5	201	0.782425769599952
GBM	8	150	0.243936739406995
GBM	3	318	2.07255573777058
GBM	7	159	0.333684911105821
GBM	23	206	1.04045176323408
GBM	9	74	-0.597452370269501
GBM	7	54	-0.844259842441274
GBM	5	87	-0.496485677108322
OV	4	295	-0.565619468309653
OV	16	573	0.43363876138174
OV	19	265	-0.617305238810932
OV	17	389	-0.196927638733864
OV	13	725	0.94705074836111
OV	10	188	-0.913636989684932
OV	11	168	-0.979105632319885
OV	21	251	-0.658653855211956
OV	21	362	-0.276179153502491
OV	17	572	0.43363876138174
OV	14	241	-0.717231061780072
OV	16	524	0.264798577744228
OV	15	460	0.0408269055720195
OV	4	1080	2.13926918792394
OV	8	330	-0.431236465006328
OV	18	348	-0.334756360070607
OV	7	787	1.14001095823255
OV	13	193	-0.886071245417583
OV	7	364	-0.317527769903515
OV	0	194	-0.927419861818606
OV	1	1137	2.32533796172855
OV	4	673	0.736861948322576
OV	23	254	-0.641425265044863
OV	9	703	0.857462079492227
OV	13	248	-0.69655675357956
OV	8	327	-0.441573619106584
OV	11	266	-0.641425265044863
OV	15	280	-0.579402340443328
OV	18	578	0.45775878761567
OV	15	527	0.271690013811066
OV	5	637	0.616261817152925
OV	29	240	-0.668991009312211
OV	27	189	-0.851614065083397
OV	11	591	0.478433095816181
OV	17	333	-0.389887848605305
OV	18	261	-0.634533828978025
OV	11	499	0.16142703674167
OV	10	172	-0.968768478219629
OV	16	499	0.178655626908763
OV	9	734	0.964279338528203
OV	13	282	-0.579402340443328
OV	17	291	-0.534608006008886
OV	6	911	1.56383427634304
OV	5	822	1.25371965333537
OV	19	339	-0.362322104337956
OV	7	337	-0.410562156805817
OV	21	341	-0.348539232204282
OV	19	425	-0.065990353463957
OV	13	658	0.716187640122064
OV	12	416	-0.121121841998655
OV	11	635	0.6300446892866
OV	9	443	-0.0384246091966082
OV	23	245	-0.67243672734563
OV	7	273	-0.631088110944607
OV	19	446	0.00636972523783358
OV	17	356	-0.310636333836677
OV	12	261	-0.655208137178537
OV	23	499	0.202775653142694
OV	21	543	0.347495810546275
OV	12	237	-0.737905369980583
OV	3	902	1.52248565994202
OV	16	530	0.28547288594474
OV	14	400	-0.169361894466515
OV	13	150	-1.03423712085458
OV	12	370	-0.27962487153591
OV	28	371	-0.221047664967794
OV	23	673	0.802330590957529
OV	28	396	-0.134904714132329
OV	13	533	0.28547288594474
OV	31	284	-0.510487979774956
OV	19	705	0.89881069589325
OV	18	273	-0.593185212577002
OV	11	224	-0.786145422448444
OV	8	293	-0.558728032242816
OV	8	301	-0.531162287975467
OV	14	219	-0.793036858515281
OV	23	153	-0.989442786420141
OV	6	76	-1.31334028156149
OV	8	310	-0.5001508256747
OV	22	521	0.275135731844484
OV	21	487	0.154535600674833
OV	15	270	-0.613859520777514
OV	6	839	1.3157425779369
OV	11	428	-0.0832189436310499
OV	6	660	0.698959049954971
OV	9	365	-0.307190615803259
OV	9	185	-0.927419861818606
OV	13	177	-0.94120273395228
OV	10	315	-0.47603079944077
OV	13	438	-0.0418703272300268
OV	10	582	0.443975915481995
OV	15	380	-0.234830537101468
OV	14	461	0.0408269055720195
OV	1	647	0.636936125353437
OV	11	470	0.0615012137725311
OV	9	1888	4.94063794909326
OV	0	2507	7.04252594947861
OV	16	603	0.537010302384297
OV	12	807	1.22615390906802
OV	10	648	0.671393305687623
OV	5	1280	2.83185851264108
OV	14	339	-0.379550694505049
OV	0	2159	5.84341607384894
OV	9	339	-0.396779284672142
OV	0	789	1.12278236806546
OV	14	368	-0.27962487153591
GBM	20	209	1.04045176323408
GBM	7	259	1.45553705734115
GBM	0	45	-1.02375618583893
GBM	14	116	-0.070181861538897
GBM	5	82	-0.552578284420088
GBM	6	132	0.0195663101599292
GBM	5	48	-0.9340080141401
GBM	8	82	-0.518922720033028
GBM	3	187	0.6029294262023
GBM	10	116	-0.11505594738831
GBM	10	136	0.109314481858755
GBM	11	89	-0.406737505409495
GBM	19	189	0.804862812524659
GBM	7	93	-0.406737505409495
GBM	11	62	-0.709637584893034
GBM	17	553	4.86596758189655
GBM	11	45	-0.90035244975304
GBM	4	61	-0.79938575659186
GBM	5	45	-0.96766357852716
GBM	7	75	-0.608670891731855
GBM	11	94	-0.350644898097729
GBM	4	62	-0.788167235129507
GBM	4	187	0.614147947664653
GBM	6	101	-0.328207855173023
GBM	4	126	-0.070181861538897
GBM	4	133	0.00834778869757593
GBM	26	311	2.25205208116823
GBM	14	66	-0.631107934656561
GBM	5	114	-0.193585597624783
GBM	1	146	0.120533003321109
GBM	5	130	-0.0140892542271306
GBM	3	112	-0.238459683474196
GBM	8	75	-0.597452370269501
GBM	2	47	-0.978882099989513
GBM	4	208	0.849736898374072
GBM	15	204	0.928266548610545
GBM	9	138	0.120533003321109
GBM	4	106	-0.294552290785963
GBM	5	123	-0.0926189044636036
GBM	8	171	0.479525690116414
GBM	12	196	0.804862812524659
GBM	2	247	1.26482219248114
GBM	18	622	5.65126408426128
GBM	6	122	-0.0926189044636036
GBM	7	187	0.647803512051713
GBM	2	89	-0.507704198570675
GBM	3	84	-0.552578284420088
GBM	24	98	-0.159930033237723
GBM	18	117	-0.0140892542271306
GBM	5	119	-0.137492990313017
GBM	6	181	0.56927386181524
GBM	5	79	-0.586233848807148
GBM	30	261	1.73600009389998
GBM	8	153	0.277592303794055
GBM	6	93	-0.417956026871849
GBM	4	98	-0.384300462484789
GBM	7	86	-0.485267155645968
GBM	6	179	0.546836818890533
GBM	5	101	-0.339426376635376
GBM	6	107	-0.260896726398903
GBM	4	142	0.109314481858755
GBM	1	127	-0.0926189044636036
LUSC	6	232	0.00489014148364353
LUSC	9	225	-0.0157366188205299
LUSC	8	121	-0.557189076805081
LUSC	10	64	-0.840807030987465
LUSC	8	814	3.01639714589296
LUSC	2	1012	4.00648164049328
LUSC	11	625	2.0572527917489
LUSC	14	289	0.340074996426461
LUSC	16	234	0.0667704223961637
LUSC	21	344	0.659789781141149
LUSC	18	170	-0.252944362318524
LUSC	9	173	-0.283884502774784
LUSC	7	364	0.690729921597409
LUSC	14	381	0.814490483422449
LUSC	3	185	-0.252944362318524
LUSC	8	148	-0.417958444751911
LUSC	20	385	0.866057384182882
LUSC	5	88	-0.742829919542642
GBM	7	75	-0.608670891731855
GBM	3	127	-0.070181861538897
GBM	7	113	-0.18236707616243
GBM	5	98	-0.373081941022436
GBM	2	142	0.0868774389340489
GBM	2	103	-0.350644898097729
GBM	2	92	-0.474048634183615
GBM	7	107	-0.24967820493655
GBM	1	175	0.445870125729354
GBM	14	315	2.16230390946941
GBM	5	111	-0.227241162011843
GBM	12	306	2.03890017338352
GBM	11	209	0.939485070072898
GBM	8	228	1.11898141347055
GBM	14	110	-0.137492990313017
GBM	1	131	-0.0477448186141905
GBM	4	81	-0.575015327344795
GBM	3	113	-0.227241162011843
GBM	7	141	0.131751524783462
GBM	4	351	2.45398546749059
GBM	5	180	0.546836818890533
GBM	3	154	0.232718217944642
GBM	10	142	0.176625610632875
GBM	2	170	0.400996039879941
GBM	7	174	0.50196273304112
GBM	21	147	0.356121954030528
GBM	4	90	-0.474048634183615
GBM	14	90	-0.361863419560082
GBM	6	183	0.591710904739947
GBM	10	101	-0.283333769323609
GBM	5	98	-0.373081941022436
GBM	4	69	-0.709637584893034
GBM	4	71	-0.687200541968328
GBM	4	73	-0.664763499043621
GBM	5	95	-0.406737505409495
GBM	2	49	-0.956445057064806
GBM	4	91	-0.462830112721262
GBM	4	97	-0.395518983947142
GBM	6	77	-0.597452370269501
GBM	13	153	0.333684911105821
GBM	9	115	-0.137492990313017
GBM	16	147	0.300029346718761
GBM	6	245	1.28725923540585
OV	6	745	0.991845082795552
OV	16	585	0.474987377782763
OV	0	29	-1.49596333733267
OV	27	342	-0.324419205970352
OV	14	510	0.209667089209531
OV	2	1229	2.64578973883648
OV	10	413	-0.138350432165747
OV	18	648	0.698959049954971
OV	12	389	-0.214156228900957
LUSC	16	158	-0.325138023383131
LUSC	4	178	-0.283884502774784
LUSC	22	134	-0.417958444751911
LUSC	17	238	0.0925538727763804
LUSC	2	186	-0.252944362318524
LUSC	6	131	-0.515935556196735
LUSC	2	33	-1.04191794395316
LUSC	17	116	-0.536562316500908
LUSC	14	292	0.355545066654591
LUSC	27	237	0.138964083460771
LUSC	16	234	0.0667704223961637
LUSC	21	282	0.340074996426461
LUSC	11	201	-0.129183800493483
LUSC	17	324	0.536029219316108
LUSC	2	34	-1.03676125387711
LUSC	31	280	0.381328517034808
LUSC	9	234	0.0306735918638603
LUSC	11	212	-0.0724602096570067
LUSC	8	146	-0.428271824903998
LUSC	13	156	-0.350921473763347
LUSC	0	28	-1.07801477448546
LUSC	6	158	-0.376704924143564
LUSC	0	75	-0.835650340911422
LUSC	1	60	-0.907844001976029
LUSC	16	194	-0.13949718064557
LUSC	6	226	-0.0260499989726166
LUSC	7	346	0.597909500228628
LUSC	19	454	1.21671230935383
LUSC	16	336	0.592752810152585
LUSC	12	181	-0.227160911938307
LUSC	13	317	0.479305628479631
LUSC	2	35	-1.03160456380107
LUSC	25	129	-0.428271824903998
LUSC	4	649	2.14491652304163
LUSC	18	242	0.118337323156597
LUSC	8	49	-0.928470762280202
LUSC	11	132	-0.484995415740474
LUSC	16	87	-0.691263018782208
LUSC	13	308	0.432895417795241
LUSC	16	258	0.190530984221204
LUSC	9	61	-0.861433791291639
LUSC	21	285	0.355545066654591
LUSC	11	85	-0.727359849314512
LUSC	23	296	0.422582037643155
LUSC	14	303	0.412268657491068
LUSC	2	172	-0.325138023383131
LUSC	11	102	-0.639696118021775
LUSC	16	285	0.329761616274374
LUSC	16	123	-0.505622176044648
LUSC	20	368	0.778393652890146
LUSC	15	112	-0.567502456957168
LUSC	7	150	-0.412801754675868
LUSC	15	261	0.200844364373291
LUSC	14	164	-0.304511263078957
LUSC	14	618	2.03662603144472
OV	21	270	-0.593185212577002
OV	12	542	0.313038630212089
OV	6	139	-1.09626004545612
OV	18	397	-0.165916176433096
OV	5	231	-0.782699704415025
OV	15	239	-0.72067677981349
OV	18	424	-0.0728817895307941
OV	12	219	-0.799928294582118
OV	13	446	-0.014304582962678
OV	10	354	-0.341647796137445
OV	2	618	0.540456020417716
OV	14	183	-0.91708270771835
OV	17	280	-0.572510904376491
OV	16	464	0.0580554957391125
OV	31	186	-0.848168347049978
OV	14	639	0.65416471552053
OV	12	262	-0.651762419145118
OV	8	474	0.0649469318059497
OV	10	327	-0.434682183039747
OV	9	340	-0.393333566638724
OV	11	546	0.323375784312344
OV	7	958	1.72922874194713
OV	8	399	-0.193481920700445
OV	20	519	0.26135285971081
OV	9	676	0.764427692589925
OV	14	513	0.220004243309787
OV	16	537	0.30959291217867
OV	11	451	-0.00396742886242221
OV	8	374	-0.27962487153591
OV	11	336	-0.400225002705561
OV	12	290	-0.555282314209398
OV	16	299	-0.510487979774956
OV	13	526	0.26135285971081
OV	18	510	0.223449961343205
OV	7	797	1.17446813856674
OV	2	1453	3.41763057832224
OV	0	1753	4.44445455228099
OV	9	343	-0.382996412538468
OV	5	409	-0.169361894466515
OV	9	434	-0.0694360714973755
OV	14	125	-1.11693435365663
OV	12	513	0.213112807242949
OV	9	181	-0.94120273395228
OV	24	342	-0.334756360070607
OV	17	408	-0.13145899609891
OV	12	207	-0.841276910983141
OV	19	398	-0.159024740366259
OV	32	177	-0.875734091317327
OV	9	180	-0.944648451985699
OV	19	307	-0.472585081407351
OV	18	357	-0.30374489776984
OV	14	199	-0.861951219183653
OV	9	539	0.292364322011577
OV	12	288	-0.562173750276235
OV	18	512	0.230341397410042
OV	14	213	-0.813711166715792
OV	13	836	1.32952545007057
OV	14	331	-0.407116438772398
OV	10	584	0.450867351548833
OV	14	294	-0.534608006008886
OV	10	307	-0.503596543708119
OV	6	353	-0.358876386304538
OV	12	289	-0.558728032242816
OV	19	268	-0.606968084710677
OV	13	257	-0.665545291278793
OV	2	1317	2.94901292577731
OV	8	276	-0.617305238810932
OV	8	571	0.399181581047554
OV	8	290	-0.569065186343072
OV	20	309	-0.462247927307096
OV	9	490	0.123524138374066
OV	19	480	0.123524138374066
OV	17	157	-0.996334222486978
OV	6	270	-0.644870983078281
OV	28	280	-0.534608006008886
OV	8	483	0.0959583941067171
OV	7	398	-0.200373356767282
OV	5	847	1.33986260417083
OV	14	575	0.43363876138174
OV	4	482	0.0787298039396241
OV	10	140	-1.07903145528902
OV	6	477	0.0683926498393683
OV	7	559	0.354387246613112
OV	16	494	0.16142703674167
OV	15	128	-1.10315148152295
OV	10	143	-1.06869430118877
OV	9	317	-0.472585081407351
OV	9	175	-0.961877042152792
OV	7	104	-1.21341445859235
OV	25	381	-0.196927638733864
OV	25	211	-0.782699704415025
OV	12	388	-0.217601946934375
OV	21	356	-0.296853461703003
OV	14	411	-0.13145899609891
OV	1	852	1.34330832220425
OV	12	549	0.337158656446019
OV	18	360	-0.293407743669584
OV	11	565	0.388844426947298
OV	25	403	-0.121121841998655
OV	9	461	0.0235983154049266
OV	6	140	-1.0928143274227
OV	8	845	1.34330832220425
OV	15	663	0.740307666355995
OV	0	1954	5.13704387699812
OV	13	208	-0.834385474916304
OV	8	584	0.443975915481995
OV	8	425	-0.103893251831562
OV	21	434	-0.0280874550963524
OV	15	340	-0.372659258438212
OV	12	582	0.450867351548833
OV	18	735	0.998736518862389
OV	6	1359	3.10751595531457
OV	22	284	-0.541499442075723
OV	7	977	1.79469738458209
OV	22	526	0.292364322011577
OV	10	210	-0.837831192949723
OV	8	860	1.39499409270553
OV	5	500	0.144198446574577
OV	4	255	-0.703448189646397
OV	5	259	-0.686219599479304
OV	4	63	-1.36502605206277
OV	26	359	-0.269287717435654
OV	18	701	0.881582105726157
OV	18	363	-0.283070589569329
OV	6	458	0.00292400720441498
OV	8	470	0.0511640596722753
OV	13	158	-1.00667137658723
OV	0	574	0.381952990880461
OV	5	357	-0.348539232204282
OV	10	556	0.354387246613112
OV	2	618	0.540456020417716
OV	17	452	0.020152597371508
OV	2	277	-0.634533828978025
OV	14	590	0.485324531883019
OV	2	524	0.216558525276368
OV	4	648	0.650718997487111
OV	24	593	0.53011886631746
OV	8	494	0.133861292474322
OV	17	501	0.188992781009019
OV	18	429	-0.0556531993637012
OV	28	46	-1.34090602582884
OV	33	185	-0.84472262901656
OV	15	384	-0.221047664967794
OV	15	509	0.209667089209531
OV	14	667	0.75064482045625
OV	26	398	-0.134904714132329
OV	6	812	1.2227081910346
OV	15	779	1.14001095823255
OV	28	192	-0.837831192949723
OV	6	192	-0.913636989684932
OV	10	180	-0.94120273395228
OV	4	79	-1.30989456352807
OV	24	386	-0.183144766600189
OV	11	172	-0.965322760186211
OV	4	323	-0.469139363373933
OV	16	142	-1.05146571102168
OV	15	403	-0.15557902233284
OV	16	205	-0.834385474916304
OV	21	433	-0.031533173129771
OV	19	282	-0.558728032242816
OV	24	518	0.271690013811066
OV	8	699	0.840233489325134
OV	17	753	1.05731372543051
OV	16	269	-0.613859520777514
OV	10	207	-0.848168347049978
OV	10	197	-0.882625527384164
OV	12	590	0.478433095816181
OV	11	673	0.760981974556506
OV	12	421	-0.103893251831562
OV	10	566	0.388844426947298
OV	11	478	0.0890669580398799
OV	8	243	-0.731013933913746
OV	12	686	0.809222027024367
OV	8	278	-0.610413802744095
OV	21	170	-0.937757015918862
OV	7	72	-1.32367743566174
OV	15	201	-0.851614065083397
GBM	5	88	-0.485267155645968
GBM	9	153	0.288810825256408
GBM	8	114	-0.159930033237723
GBM	2	122	-0.137492990313017
GBM	3	136	0.0307848316222825
GBM	5	117	-0.159930033237723
GBM	6	94	-0.406737505409495
GBM	13	154	0.344903432568174
GBM	2	77	-0.642326456118914
GBM	2	104	-0.339426376635376
GBM	10	155	0.322466389643468
GBM	5	71	-0.675982020505974
GBM	5	116	-0.171148554700077
GBM	2	51	-0.9340080141401
GBM	4	137	0.0532218745469891
GBM	5	195	0.715114640825833
GBM	1	150	0.165407089170522
GBM	5	154	0.255155260869348
GBM	8	122	-0.070181861538897
GBM	9	151	0.266373782331701
GBM	6	197	0.748770205212893
GBM	1	208	0.816081333987012
GBM	3	114	-0.21602264054949
GBM	6	244	1.2760407139435
GBM	4	125	-0.0814003830012503
GBM	10	90	-0.406737505409495
GBM	6	213	0.928266548610545
GBM	5	92	-0.440393069796555
GBM	10	151	0.277592303794055
GBM	6	152	0.243936739406995
GBM	6	133	0.0307848316222825
GBM	4	164	0.356121954030528
GBM	0	31	-1.18081548631187
GBM	8	94	-0.384300462484789
GBM	2	134	-0.00287073276477735
GBM	7	109	-0.227241162011843
GBM	10	139	0.142970046245815
GBM	6	73	-0.642326456118914
GBM	6	109	-0.238459683474196
GBM	2	160	0.288810825256408
GBM	7	61	-0.765730192204801
GBM	4	132	-0.00287073276477735
GBM	4	176	0.490744211578767
GBM	8	162	0.378558996955234
GBM	4	115	-0.193585597624783
GBM	12	140	0.176625610632875
GBM	16	63	-0.642326456118914
GBM	7	83	-0.518922720033028
GBM	3	174	0.457088647191707
GBM	9	209	0.917048027148192
GBM	6	165	0.389777518417588
GBM	3	107	-0.294552290785963
GBM	7	123	-0.070181861538897
GBM	3	70	-0.709637584893034
GBM	8	85	-0.485267155645968
GBM	5	103	-0.316989333710669
GBM	11	71	-0.608670891731855
GBM	9	158	0.344903432568174
GBM	9	48	-0.889133928290687
GBM	9	105	-0.24967820493655
GBM	6	128	-0.0253077756894839
GBM	5	178	0.524399775965827
OV	10	369	-0.289962025636166
OV	4	55	-1.39259179633012
OV	5	613	0.533564584350879
OV	1	2060	5.50573570657391
OV	14	483	0.116632702307229
OV	16	312	-0.465693645340514
OV	19	582	0.474987377782763
OV	10	227	-0.779253986381606
OV	29	310	-0.42779074697291
OV	14	592	0.492215967949856
OV	8	494	0.133861292474322
OV	9	614	0.550793174517972
OV	10	1191	2.54241819783392
OV	16	567	0.412964453181228
OV	7	550	0.323375784312344
OV	9	382	-0.248613409235143
OV	17	434	-0.0418703272300268
OV	11	263	-0.651762419145118
OV	8	532	0.264798577744228
OV	5	961	1.73267445998055
OV	30	299	-0.462247927307096
OV	18	403	-0.145241868232585
OV	15	251	-0.679328163412467
OV	15	385	-0.217601946934375
OV	13	153	-1.02389996675433
OV	9	476	0.0752840859062055
OV	21	330	-0.386442130571886
OV	5	170	-0.992888504453559
OV	13	298	-0.52427085190863
OV	11	612	0.550793174517972
OV	11	230	-0.765471114247932
OV	14	431	-0.0625446354305384
OV	9	760	1.05386800739709
OV	14	667	0.75064482045625
OV	18	378	-0.23138481906805
OV	12	435	-0.0556531993637012
OV	7	333	-0.424345028939491
OV	16	437	-0.0349788911631896
OV	12	366	-0.293407743669584
OV	11	168	-0.979105632319885
OV	24	292	-0.507042261741537
OV	0	792	1.13311952216571
OV	9	757	1.04353085329683
OV	15	274	-0.600076648643839
OV	5	885	1.47079988944074
OV	5	91	-1.26510022909363
OV	12	344	-0.369213540404793
PRAD	0	59	-0.340449036675276
PRAD	0	42	-0.521357724307127
PRAD	8	84	0.0107266510806723
PRAD	0	37	-0.574566161845907
PRAD	1	127	0.393827401359888
PRAD	2	148	0.62794452653052
PRAD	2	77	-0.127615286520156
PRAD	0	43	-0.510716036799371
PRAD	1	28	-0.659699661907955
PRAD	1	84	-0.0637651614736197
UCEC	6	453	1.50953611478083
BLCA	6	193	-0.0712097480458301
BLCA	7	361	0.890245526322087
BLCA	9	67	-0.770967137082835
BLCA	20	150	-0.236193197493579
BLCA	4	233	0.144975461575358
BLCA	3	449	1.36812862127419
TGCT	5	35	-1.13492164282913
TGCT	12	87	-0.253363355952668
TGCT	0	28	-1.31422163338028
TGCT	11	114	0.135119956908147
TGCT	19	120	0.344303279217817
TGCT	10	178	1.07644490730166
TGCT	11	78	-0.402780014745289
TGCT	19	87	-0.148771694797833
TGCT	4	65	-0.701613332330531
TGCT	16	194	1.40516155664543
TGCT	17	178	1.18103656845649
TGCT	21	116	0.314419947459293
TGCT	2	43	-1.06021331343282
TGCT	7	71	-0.567138339417172
TGCT	19	124	0.404069942734865
TGCT	2	45	-1.0303299816743
TGCT	11	88	-0.253363355952668
TGCT	3	33	-1.19468830634618
TGCT	16	150	0.747728257957894
TGCT	11	173	1.01667824378461
TGCT	13	78	-0.372896682986764
TGCT	9	55	-0.776321661726841
TGCT	31	117	0.478778272131176
TGCT	19	173	1.13621157081871
TGCT	9	75	-0.477488344141599
TGCT	23	112	0.284536615700768
TGCT	16	107	0.105236625149623
TGCT	14	79	-0.34301335122824
TGCT	16	150	0.747728257957894
TGCT	17	126	0.404069942734865
TGCT	17	132	0.493719938010438
TGCT	30	109	0.344303279217817
TGCT	13	57	-0.686671666451269
TGCT	15	150	0.732786592078632
TGCT	20	87	-0.133830028918571
TGCT	13	100	-0.0441800336429981
TGCT	20	76	-0.298188353590454
TGCT	15	179	1.16609490257723
TGCT	6	31	-1.17974664046692
TGCT	19	84	-0.193596692435619
TGCT	17	167	1.01667824378461
TGCT	18	44	-0.806204993485366
TGCT	17	277	2.66026149050344
TGCT	15	62	-0.582080005296434
TGCT	14	91	-0.163713360677095
TGCT	17	104	0.0753532933910988
TGCT	3	27	-1.28433830162175
TGCT	12	96	-0.118888363039309
TGCT	20	97	0.0155866298740504
TGCT	17	57	-0.62690500293422
TGCT	19	169	1.07644490730166
TGCT	19	106	0.135119956908147
TGCT	3	35	-1.16480497458766
TGCT	6	57	-0.791263327606104
TGCT	17	65	-0.507371675900123
TGCT	17	60	-0.582080005296434
TGCT	6	33	-1.14986330870839
TGCT	21	80	-0.223480024194143
TGCT	8	108	0.000644963994788262
TGCT	16	96	-0.0591216995222602
TGCT	20	119	0.344303279217817
TGCT	17	68	-0.462546678262337
TGCT	11	110	0.0753532933910988
TGCT	4	174	0.927028248509039
TGCT	15	231	1.94306152829886
TGCT	16	131	0.463836606251914
TGCT	18	88	-0.148771694797833
TGCT	12	61	-0.641846668813482
TGCT	25	136	0.673019928561583
ESCA	12	528	1.86130196808812
ESCA	9	255	0.014726353260968
ESCA	14	263	0.10170274091587
ESCA	6	330	0.496441731041964
ESCA	7	162	-0.620870325755624
ESCA	14	239	-0.0588690516777953
ESCA	11	482	1.54684887425886
ESCA	12	549	2.00180228660758
ESCA	6	321	0.43622730881934
ESCA	6	603	2.32294587179491
ESCA	6	253	-0.0187261035293789
PAAD	1	46	-0.536463476437735
PAAD	9	56	-0.223045407296479
PAAD	13	117	0.908742064602499
PAAD	3	61	-0.240457522248771
PAAD	0	34	-0.76282097081753
PAAD	2	44	-0.553875591390027
PAAD	8	51	-0.327518097010231
PAAD	4	67	-0.118572717582727
PAAD	13	103	0.664972455270411
PAAD	17	113	0.908742064602499
PAAD	0	41	-0.640936166151487
PAAD	6	126	0.943566294507083
PAAD	10	398	5.74931002133967
PAAD	0	44	-0.588699821294611
PAAD	1	71	-0.101160602630435
PAAD	12	106	0.699796685174995
PAAD	0	40	-0.658348281103779
KIRP	1	15	-0.822421393763844
PAAD	6	81	0.160021121653944
PAAD	9	88	0.334142271176864
PAAD	0	54	-0.414578671771691
PAAD	5	113	0.699796685174995
PAAD	9	77	0.142609006701652
PAAD	29	157	1.88382050193085
LIHC	8	54	-0.667862894129789
CESC	1	30	-1.10475898297457
TGCT	15	33	-1.01538831579504
TGCT	5	43	-1.01538831579504
LIHC	11	77	-0.413192659949123
LIHC	3	40	-0.853968065261814
LIHC	9	152	0.301842997558131
LIHC	2	61	-0.65806788512284
LIHC	8	50	-0.707042930157584
LIHC	1	32	-0.951918155331301
LIHC	9	219	0.958108601023693
LIHC	11	197	0.762208420884719
LIHC	5	264	1.35970397030859
LIHC	4	128	0.0177877363566188
LIHC	23	145	0.370408060606772
LIHC	5	179	0.52712820471795
LIHC	8	78	-0.432782677963021
LIHC	12	61	-0.560117795053354
LIHC	4	170	0.429178114648464
LIHC	6	53	-0.697247921150635
LIHC	22	162	0.52712820471795
LIHC	4	285	1.55560415044756
LIHC	10	240	1.17359879917656
LIHC	6	45	-0.775607993206225
KIRP	9	56	-0.00534749280710606
KIRP	8	58	0.0113274847634396
KIRP	16	77	0.461551879168173
KIRP	9	37	-0.322172066647474
KIRP	9	48	-0.138747313371471
KIRP	8	39	-0.305497089076928
KIRP	2	41	-0.372196999359111
KIRP	0	37	-0.472246864782385
KIRP	4	30	-0.522271797494022
KIRP	5	42	-0.305497089076928
KIRP	21	49	0.0780273950456223
KIRP	2	61	-0.0386974479481974
KIRP	4	64	0.0446774399045309
KIRP	3	36	-0.438896909641293
KIRP	1	72	0.128052327757259
KIRP	8	41	-0.272147133935837
KIRP	0	34	-0.522271797494022
KIRP	0	13	-0.872446326475481
KIRP	8	33	-0.405546954500202
KIRP	7	50	-0.138747313371471
KIRP	8	42	-0.255472156365291
KIRP	8	51	-0.10539735823038
KIRP	9	35	-0.355522021788565
OV	18	548	0.354387246613112
OV	3	633	0.595587508952414
OV	30	449	0.0546097777056939
OV	8	486	0.106295548206973
OV	11	643	0.657610433553948
OV	12	291	-0.551836596175979
OV	23	260	-0.620750956844351
OV	17	705	0.891919259826413
OV	12	669	0.75064482045625
OV	14	447	-0.00741314689584081
OV	11	572	0.412964453181228
OV	4	416	-0.148687586266003
OV	25	401	-0.128013278065492
OV	21	222	-0.758579678181095
OV	14	653	0.70240476798839
OV	14	175	-0.944648451985699
OV	14	401	-0.165916176433096
OV	7	360	-0.331310642037189
OV	15	293	-0.534608006008886
OV	10	516	0.216558525276368
OV	2	722	0.89881069589325
OV	23	236	-0.703448189646397
OV	14	176	-0.94120273395228
OV	21	506	0.220004243309787
GBM	4	268	1.52284818611527
GBM	5	249	1.32091479979291
GBM	6	183	0.591710904739947
GBM	6	105	-0.283333769323609
GBM	11	256	1.4667555788035
GBM	5	55	-0.855478363903627
GBM	0	66	-0.788167235129507
GBM	5	93	-0.429174548334202
GBM	5	168	0.412214561342294
GBM	9	110	-0.193585597624783
GBM	2	162	0.311247868181115
GBM	8	158	0.333684911105821
GBM	6	107	-0.260896726398903
GBM	11	121	-0.0477448186141905
GBM	13	192	0.771207248137599
GBM	6	122	-0.0926189044636036
GBM	7	209	0.894610984223485
GBM	10	113	-0.14871151177537
GBM	8	171	0.479525690116414
GBM	5	314	2.05011869484587
GBM	8	229	1.1301999349329
GBM	18	242	1.38822592856703
GBM	7	167	0.423433082804647
GBM	3	87	-0.518922720033028
GBM	2	143	0.0980959603964022
GBM	10	118	-0.0926189044636036
LUSC	11	452	1.1651454085934
LUSC	15	167	-0.283884502774784
LUSC	19	213	-0.0260499989726166
LUSC	14	155	-0.350921473763347
LUSC	9	174	-0.278727812698741
LUSC	7	276	0.236941194905594
LUSC	11	123	-0.531405626424865
LUSC	16	209	-0.06214682950492
LUSC	22	233	0.0925538727763804
LUSC	5	64	-0.866590481367682
LUSC	17	230	0.0513003521680336
LUSC	16	148	-0.376704924143564
LUSC	12	169	-0.289041192850827
LUSC	26	136	-0.387018304295651
LUSC	17	209	-0.0569901394288766
LUSC	15	262	0.206001054449334
LUSC	22	231	0.0822404926242937
LUSC	17	103	-0.603599287489471
LUSC	18	323	0.536029219316108
LUSC	12	219	-0.0312066890486599
LUSC	29	206	-0.0105799287444865
LUSC	21	267	0.262724645285811
LUSC	1	130	-0.546875696652995
LUSC	16	232	0.056457042244077
LUSC	4	54	-0.923314072204159
LUSC	6	323	0.474148938403588
LUSC	24	227	0.071927112472207
LUSC	1	51	-0.954254212660419
LUSC	0	30	-1.06770139433337
LUSC	7	140	-0.464368655436301
LUSC	10	55	-0.887217241671856
LUSC	24	183	-0.1549672508737
LUSC	3	120	-0.588129217261341
LUSC	20	137	-0.412801754675868
LUSC	16	258	0.190530984221204
LUSC	19	115	-0.531405626424865
LUSC	23	142	-0.371548234067521
LUSC	7	118	-0.577815837109255
LUSC	11	113	-0.582972527185298
LUSC	25	140	-0.371548234067521
LUSC	15	324	0.525715839164022
LUAD	4	100	-0.465365201954662
LUAD	0	130	-0.270792337007297
LUAD	12	78	-0.570135206157089
LUAD	17	408	1.93686132297242
OV	8	253	-0.69655675357956
OV	19	125	-1.09970576348954
OV	9	404	-0.172807612499933
OV	21	425	-0.0590989173971198
OV	11	288	-0.565619468309653
OV	20	489	0.157981318708252
OV	11	283	-0.582848058476746
OV	14	279	-0.586293776510165
OV	9	735	0.967725056561622
OV	16	311	-0.469139363373933
OV	13	420	-0.103893251831562
OV	5	814	1.22615390906802
OV	7	730	0.943605030327692
OV	2	913	1.5569428402762
OV	8	530	0.257907141677391
OV	8	712	0.885027823759576
OV	4	602	0.492215967949856
OV	4	672	0.733416230289157
OV	3	84	-1.2961116913944
OV	12	387	-0.221047664967794
OV	7	680	0.771319128656762
OV	2	849	1.33641688613741
OV	5	596	0.474987377782763
OV	4	769	1.06765087953076
OV	5	1148	2.37702373222983
OV	2	698	0.816113463091204
OV	6	877	1.44667986320681
OV	20	567	0.426747325314902
LUSC	8	241	0.0616137323201203
LUSC	11	268	0.216314434601421
LUSC	3	929	3.58363305425773
LUSC	2	905	3.45471580235664
LUSC	4	1266	5.32659429996038
LUSC	4	1457	6.31152210448466
LUSC	19	207	-0.0569901394288766
LUSC	9	2313	10.751432259958
LUSC	10	829	3.10406087718569
LUSC	19	432	1.10326512768088
LUSC	15	375	0.788707033042232
LUSC	11	198	-0.144653870721614
LUSC	15	375	0.788707033042232
LUAD	9	204	0.35034411647852
LUAD	1	109	-0.420463771582193
LUAD	0	88	-0.585102349614579
LUAD	14	325	1.29327415430036
LUAD	6	205	0.335376973021031
LUAD	2	775	4.57107857149058
LUAD	11	411	1.91441060778618
LUAD	13	207	0.402729118579734
LUAD	10	200	0.327893401292286
LUAD	1	22	-1.07153451198299
LUAD	0	23	-1.07153451198299
LUSC	2	242	0.0358302819399036
LUSC	20	216	-0.00542323866844317
LUSC	13	266	0.216314434601421
LUSC	7	154	-0.392174994371694
LUSC	2	30	-1.05738801418129
LUSC	6	116	-0.593285907337385
LUSC	17	118	-0.526248936348821
LUSC	2	50	-0.954254212660419
LUSC	11	264	0.195687674297247
LUSC	3	33	-1.03676125387711
LUSC	14	207	-0.0827735898090934
LUSC	12	295	0.360701756730634
LUSC	11	217	-0.0466767592767899
LUSC	11	180	-0.237474292090394
LUSC	5	553	1.65503096581751
LUSC	2	50	-0.954254212660419
LUSC	15	124	-0.505622176044648
PAAD	7	97	0.456027075842908
PAAD	0	27	-0.884705775483574
PAAD	11	101	0.595323995461243
PAAD	8	116	0.804269374888747
PAAD	14	66	0.0381363169879003
PAAD	7	62	-0.153396947487311
PAAD	0	24	-0.93694212034045
PAAD	19	40	-0.327518097010231
PAAD	24	67	0.229669581463112
PAAD	13	35	-0.519051361485443
PAAD	3	69	-0.101160602630435
PAAD	19	88	0.508263420699784
PAAD	9	49	-0.344930211962523
PAAD	24	95	0.717208800127287
PAAD	0	47	-0.536463476437735
PAAD	9	98	0.508263420699784
PAAD	16	183	2.11017799631064
SARC	13	467	0.744298563837412
SARC	0	100	-0.87663070429
SARC	7	573	1.17085889755515
SARC	5	389	0.377456676840155
SARC	8	71	-0.966208374370725
SARC	7	66	-0.991801994393789
SARC	23	189	-0.398883130526131
SARC	9	647	1.49504475118063
SARC	2	59	-1.04298923443992
SARC	9	63	-0.996067597730967
SARC	4	273	-0.1216189136096
SARC	21	310	0.108723666597979
SARC	6	103	-0.838240274255403
SARC	6	114	-0.791318637546452
SARC	4	93	-0.889427514301532
SARC	16	212	-0.330633477131293
SARC	0	79	-0.966208374370725
BRCA	32	389	1.06902738673993
BRCA	23	378	0.965312400239571
BRCA	11	560	1.84688978549261
BRCA	5	46	-0.849699863516693
PAAD	0	21	-0.989178465197326
PAAD	5	34	-0.675760396056071
THYM	0	24	-0.606449933941591
THYM	0	41	-0.0189515604356747
THYM	2	23	-0.571891206088302
THYM	3	55	0.568546813070241
THYM	1	29	-0.399097566821856
MESO	5	40	-0.907011451584839
MESO	10	111	0.439756955753799
MESO	18	212	2.37130638206843
MESO	0	16	-1.42090992280616
MESO	4	90	-0.0387002415901907
MESO	9	57	-0.534878075872847
MESO	29	118	0.900493516159123
MESO	12	44	-0.71208444525951
LIHC	6	43	-0.795198011220122
COAD	5	79	-0.43280243609047
STAD	15	193	0.0924823003561138
STAD	6	49	-0.732719974862589
OV	21	485	0.147644164607996
THYM	0	24	-0.606449933941591
SARC	12	496	0.863735457278379
THYM	22	108	3.05677521850706
THYM	0	50	0.292076990243928
THYM	0	19	-0.779243573208037
MESO	12	219	2.38902701900709
MESO	4	49	-0.765246356075509
MESO	23	156	1.46755389819644
MESO	0	26	-1.2437035534195
MESO	2	33	-1.0842178209715
MESO	9	116	0.510639503508465
MESO	7	71	-0.322230432608851
CHOL	0	42	-1.21351449360664
CHOL	7	96	-0.0785580081040076
CHOL	10	61	-0.673945016892275
CHOL	23	164	1.48433288996519
CHOL	6	57	-0.822791769089341
KIRC	5	41	-0.382211378836097
GBM	7	85	-0.496485677108322
GBM	10	123	-0.0365262971518372
GBM	15	122	0.00834778869757593
GBM	13	274	1.69112600805057
GBM	4	190	0.647803512051713
GBM	6	72	-0.653544977581268
GBM	16	155	0.389777518417588
GBM	7	146	0.187844132095228
GBM	9	99	-0.316989333710669
GBM	5	86	-0.507704198570675
OV	1	516	0.185547062975601
OV	1	1393	3.20744177828371
OV	1	861	1.37431978450502
OV	12	931	1.65342294521192
OV	11	200	-0.86884265525049
OV	7	1070	2.11514916169001
OV	7	768	1.0745423155976
LUSC	9	256	0.144120773536814
LUSC	16	350	0.664946471217192
LUSC	7	119	-0.572659147033211
LUSC	21	452	1.21671230935383
LUSC	17	299	0.407111967415025
LUSC	10	242	0.0770838025482504
LUSC	16	407	0.958877805551663
LUSC	18	461	1.24765244981009
LUSC	0	111	-0.650009498173862
LUSC	13	282	0.298821475818114
LUSC	1	205	-0.160123940949744
LUSC	0	29	-1.07285808440942
LUSC	15	132	-0.464368655436301
LUSC	13	271	0.242097884981638
LUSC	18	319	0.515402459011935
LUSC	11	102	-0.639696118021775
LUSC	12	209	-0.0827735898090934
LUSC	9	216	-0.06214682950492
LUSC	18	300	0.417425347567111
LUSC	4	104	-0.665479568401992
LUSC	1	27	-1.07801477448546
LUSC	23	201	-0.0673035195809633
LUAD	4	86	-0.570135206157089
LUAD	8	254	0.717039131187015
LUAD	0	58	-0.809609501476923
LUAD	4	173	0.0809355342437079
LUAD	10	298	1.06128343070928
LUAD	0	68	-0.734773784189475
LUAD	7	266	0.799358420203208
LUAD	1	127	-0.285759480464787
LUAD	7	121	-0.285759480464787
LUAD	1	38	-0.951797364323074
LUAD	2	78	-0.644970923444537
LUAD	2	53	-0.832060216663157
LUAD	6	191	0.230606968818604
LUAD	0	124	-0.315693767379766
LUAD	2	135	-0.218407334906084
LUAD	0	56	-0.824576644934412
LUAD	15	300	1.11366843281049
LUAD	7	230	0.529949837968396
LUAD	7	298	1.03883271552304
LUAD	2	123	-0.308210195651021
LUAD	8	76	-0.615036636529558
LUAD	8	254	0.717039131187015
LUAD	0	62	-0.779675214561944
LUAD	25	144	0.0210669604137495
LUAD	8	739	4.34657141962824
LUAD	8	276	0.881677709219401
LUAD	0	139	-0.203440191448594
LUAD	8	330	1.28579058257162
LUAD	1	45	-0.89941236222186
LUAD	7	190	0.230606968818604
LUAD	6	73	-0.652454495173282
LUAD	17	320	1.27830701084288
LUAD	1	54	-0.832060216663157
LUAD	2	39	-0.936830220865584
LUAD	4	171	0.0659683907862183
LUAD	14	139	-0.0986701872461672
LUAD	3	85	-0.585102349614579
LUAD	6	35	-0.936830220865584
LUAD	3	81	-0.615036636529558
LUAD	13	287	1.00141485687932
LUAD	17	336	1.39804415850279
LUAD	5	66	-0.71232306900324
LUAD	17	430	2.1014999010048
LUAD	2	24	-1.04908379679676
LUAD	7	173	0.103386249429942
LUAD	13	341	1.40552773023154
LUAD	12	356	1.51029773443396
LUAD	15	992	6.29230006910189
LUAD	10	100	-0.420463771582193
LUAD	1	155	-0.0762194720599328
LUAD	22	264	0.896644852676891
LUAD	10	291	1.00889842860806
LUAD	14	111	-0.308210195651021
LUAD	2	89	-0.562651634428344
LUAD	5	43	-0.884445218764371
LUAD	8	178	0.148287679802411
LUAD	11	45	-0.824576644934412
LUAD	0	29	-1.02663308161052
LUAD	1	46	-0.891928790493115
LUAD	10	114	-0.315693767379766
LUSC	7	355	0.644319710913019
LUSC	1	64	-0.887217241671856
LUSC	4	67	-0.856277101215595
LUSC	17	190	-0.1549672508737
LUSC	6	470	1.23218237958196
LUSC	10	408	0.933094355171446
LUSC	14	394	0.881527454411013
LUAD	2	107	-0.427947343310938
LUAD	4	140	-0.16602233280487
LUAD	14	381	1.71235417111007
LUAD	10	178	0.163254823259901
LUAD	5	68	-0.697355925545751
LUAD	7	174	0.110869821158687
LUAD	10	278	0.91161199613438
LUAD	2	38	-0.944313792594329
LUAD	5	179	0.133320536344921
LUAD	18	140	-0.0612523286024432
LUAD	13	134	-0.143571617618636
LUAD	2	147	-0.128604474161146
LUAD	3	78	-0.637487351715792
LUAD	4	113	-0.36807876948098
LUAD	3	130	-0.248341621821063
LUAD	2	179	0.110869821158687
LUAD	7	40	-0.891928790493115
LUAD	16	220	0.522466266239651
LUAD	8	105	-0.398013056395959
LUAD	4	149	-0.0986701872461672
LUAD	10	96	-0.450398058497173
LUAD	0	37	-0.966764507780563
LUAD	1	46	-0.891928790493115
LUAD	9	369	1.58513345172141
LUAD	10	312	1.1660534349117
LUAD	9	83	-0.5551680626996
LUAD	5	108	-0.398013056395959
LUAD	14	123	-0.218407334906084
LUAD	0	22	-1.07901808371174
KIRP	4	30	-0.522271797494022
KIRP	23	77	0.578276722161992
KIRP	0	27	-0.638996640487841
LUAD	16	226	0.56736769661212
THCA	1	47	0.656211486276185
UCEC	1	47	-0.590857957503081
CHOL	2	73	-0.599521640793741
CHOL	8	49	-0.934426833237142
BRCA	11	92	-0.580040898615762
CESC	11	166	0.618788283903929
TGCT	14	85	-0.253363355952668
TGCT	0	31	-1.26939663574249
TGCT	2	82	-0.477488344141599
TGCT	18	64	-0.507371675900123
PRAD	5	84	-0.0211984114425957
COAD	15	103	-0.109528034468544
HNSC	6	130	-0.0103155282007969
LIHC	1	162	0.321433015572028
COAD	12	60	-0.546899283721738
THYM	0	34	-0.260862655408699
THYM	0	50	0.292076990243928
THYM	0	57	0.533988085216952
THYM	0	38	-0.122627743995542
THYM	10	54	0.775899180189977
THYM	0	39	-0.088069016142253
THYM	4	48	0.361194445950506
THYM	1	38	-0.088069016142253
THYM	0	27	-0.502773750381723
THYM	0	27	-0.502773750381723
THYM	0	43	0.0501658952709037
THYM	0	21	-0.710126117501458
GBM	7	139	0.109314481858755
GBM	8	163	0.389777518417588
GBM	6	70	-0.675982020505974
THYM	0	25	-0.571891206088302
THYM	0	32	-0.329980111115277
THYM	0	55	0.464870629510374
THYM	0	25	-0.571891206088302
THYM	4	44	0.22295953453735
BLCA	14	360	0.92438003310438
BLCA	0	35	-1.00421960009517
BLCA	4	98	-0.623050941026232
BLCA	2	143	-0.378420309086466
BLCA	10	595	2.23855854422266
BLCA	12	92	-0.611672772098801
BLCA	6	180	-0.145167846074131
BLCA	4	64	-0.816479812792559
BLCA	10	464	1.49328847947593
BLCA	10	152	-0.281705873203303
BLCA	10	265	0.361160671196547
BLCA	3	31	-1.00990868455889
BLCA	8	530	1.85738988515372
BLCA	3	118	-0.514958336215638
BLCA	2	688	2.72213072363847
BLCA	2	90	-0.679941785663387
LUAD	0	22	-1.07901808371174
LUAD	3	102	-0.457881630225917
LUAD	3	157	-0.0462851851449536
LUAD	20	75	-0.532717347513365
LUAD	1	115	-0.375562341209725
LUAD	0	136	-0.225890906634829
LUAD	4	51	-0.832060216663157
LUAD	8	56	-0.764708071104454
LUAD	6	200	0.297959114377307
LUAD	22	207	0.470081264138437
LUAD	16	217	0.500015551053416
LUAD	9	98	-0.442914486768428
LUAD	14	140	-0.0911866155174224
LUAD	15	127	-0.18098947626236
LUAD	2	79	-0.637487351715792
LUAD	7	171	0.0884191059724527
LUAD	2	39	-0.936830220865584
LUAD	9	344	1.39804415850279
LUAD	17	200	0.3802784033935
LUAD	5	74	-0.652454495173282
LUAD	16	356	1.54023202134894
LUAD	2	185	0.155771251531156
LUAD	11	86	-0.517750204055876
LUAD	20	299	1.14360271972547
LUAD	1	62	-0.772191642833199
LUAD	7	517	2.67773492411815
LUAD	8	175	0.125836964616177
LUAD	17	302	1.14360271972547
LUAD	2	22	-1.06405094025425
LUAD	0	31	-1.01166593815303
LUAD	8	65	-0.697355925545751
LUSC	9	292	0.329761616274374
LUSC	3	1172	4.83670874273626
LUSC	27	157	-0.273571122622697
LUSC	19	327	0.561812669696325
LUSC	11	124	-0.526248936348821
LUSC	10	241	0.071927112472207
LUSC	16	373	0.783550342966189
LUSC	4	79	-0.794396820303075
LUSC	11	138	-0.454055275284214
LUAD	19	326	1.33817558467283
LUAD	11	77	-0.585102349614579
LUAD	10	56	-0.749740927646964
LUAD	15	267	0.866710565761911
LUAD	15	449	2.22872062039346
LUAD	19	335	1.40552773023154
LUAD	16	409	1.93686132297242
LUAD	24	188	0.342860544749776
LUAD	21	315	1.27082343911413
LUAD	9	45	-0.839543788391902
LUAD	1	101	-0.480332345412152
LUAD	9	233	0.56736769661212
LUAD	10	207	0.3802784033935
LUAD	3	113	-0.375562341209725
LUAD	8	75	-0.622520208258303
LUAD	1	148	-0.128604474161146
LUAD	12	245	0.679621272543292
LUAD	3	126	-0.278275908736042
LUAD	0	54	-0.839543788391902
LUAD	2	72	-0.689872353817006
LUAD	12	66	-0.659938066902027
LUAD	13	98	-0.412980199853449
LUAD	5	156	-0.0388016134162088
LUAD	1	35	-0.974248079509308
LUAD	6	102	-0.435430915039683
LUAD	6	66	-0.704839497274496
LUAD	2	32	-0.989215222966798
LUAD	2	83	-0.607553064800813
LUAD	3	16	-1.10146879889797
LUAD	14	52	-0.749740927646964
LUAD	8	123	-0.263308765278553
LUAD	0	33	-0.996698794695543
LUAD	8	120	-0.285759480464787
LUAD	12	109	-0.338144482566001
LUAD	1	75	-0.674905210359516
LUAD	9	292	1.00889842860806
LUAD	0	44	-0.91437950567935
LUAD	5	60	-0.757224499375709
LUAD	11	72	-0.622520208258303
LUAD	6	114	-0.345628054294745
LUAD	1	56	-0.817093073205667
LUAD	4	78	-0.630003779987048
LUAD	10	171	0.110869821158687
LUAD	11	159	0.0285505321424943
LUAD	13	275	0.91161199613438
LUAD	4	45	-0.876961647035626
LUAD	7	149	-0.0762194720599328
LUAD	7	107	-0.390529484667214
LUAD	20	227	0.604785555255844
LUAD	9	239	0.612269126984588
LUAD	3	284	0.904128424405635
LUAD	4	62	-0.749740927646964
LUAD	2	77	-0.652454495173282
LUAD	1	46	-0.891928790493115
LUAD	15	58	-0.697355925545751
LUAD	9	178	0.155771251531156
LUAD	23	356	1.59261702345016
LUAD	5	103	-0.435430915039683
LUAD	8	60	-0.734773784189475
LUAD	8	63	-0.71232306900324
LUAD	8	90	-0.510266632327131
LUAD	4	71	-0.682388782088261
LUAD	4	81	-0.607553064800813
LUAD	17	70	-0.592585921343324
LUAD	0	56	-0.824576644934412
LUAD	0	20	-1.09398522716922
LUAD	2	53	-0.832060216663157
LUAD	6	63	-0.72729021246073
LUAD	0	48	-0.884445218764371
LUAD	7	325	1.24088915219915
LUAD	16	286	1.01638200033681
LUAD	8	85	-0.547684490970855
LUAD	2	99	-0.487815917140897
LUAD	2	270	0.791874848474463
LUAD	8	93	-0.487815917140897
LUAD	0	23	-1.07153451198299
LUAD	26	133	-0.0537687568736984
LUAD	14	121	-0.233374478363574
LUAD	17	322	1.29327415430036
LUAD	13	89	-0.480332345412152
LUAD	0	37	-0.966764507780563
LUAD	11	240	0.634719842170823
LUAD	0	25	-1.0565673685255
LUAD	0	43	-0.921863077408095
LUAD	4	251	0.664654129085802
LUAD	16	134	-0.121120902432402
LUAD	17	317	1.25585629565664
LUAD	18	165	0.125836964616177
LUAD	7	60	-0.74225735591822
LUAD	2	78	-0.644970923444537
LUAD	11	91	-0.480332345412152
LUAD	16	230	0.597301983527099
LUAD	18	149	0.00609981695625995
LUAD	8	54	-0.779675214561944
LUSC	25	325	0.582439430000498
LUSC	2	64	-0.882060551595812
LUSC	14	224	0.00489014148364353
LUSC	9	267	0.200844364373291
LUSC	4	58	-0.902687311899986
LUSC	11	120	-0.546875696652995
LUSC	21	95	-0.624226047793645
LUSC	25	337	0.644319710913019
LUSC	14	228	0.0255169017878169
LUSC	13	115	-0.562345766881125
LUSC	23	88	-0.650009498173862
LUSC	27	264	0.278194715513941
LUSC	2	33	-1.04191794395316
LUSC	13	93	-0.675792948554078
LUSC	21	252	0.185374294145161
LUSC	19	145	-0.376704924143564
LUSC	12	159	-0.340608093611261
LUSC	1	77	-0.820180270683292
LUSC	18	101	-0.608755977565515
LUSC	8	145	-0.433428514980041
LUSC	11	78	-0.763456679846815
LUSC	11	246	0.102867252928467
LUSC	3	42	-0.990351043192722
LUSC	0	83	-0.794396820303075
LUSC	11	136	-0.464368655436301
LUSC	10	143	-0.433428514980041
LUSC	0	22	-1.10895491494172
LUSC	10	57	-0.876903861519769
LUSC	6	230	-0.00542323866844317
LUSC	12	178	-0.242630982166437
LUSC	4	378	0.747453512433886
LUSC	22	320	0.541185909392152
LUSC	23	284	0.360701756730634
LUSC	17	257	0.190530984221204
LUSC	24	303	0.463835558251501
LUSC	9	169	-0.304511263078957
LUSC	1	40	-1.0109778034969
LUSC	6	213	-0.0930869699611801
LUSC	12	110	-0.593285907337385
LUSC	4	33	-1.03160456380107
LUSC	14	148	-0.387018304295651
OV	9	618	0.564576046651646
OV	13	711	0.89881069589325
OV	16	196	-0.865396937217071
OV	4	525	0.226895679376624
OV	22	642	0.692067613888134
OV	34	318	-0.382996412538468
OV	14	568	0.409518735147809
OV	14	435	-0.048761763296864
LUSC	15	277	0.283351405589984
LUSC	14	174	-0.252944362318524
LUSC	11	65	-0.830493650835379
LUSC	23	212	-0.0105799287444865
LUSC	16	251	0.154434153688901
LUSC	16	370	0.768080272738059
LUSC	2	82	-0.789240130227032
LUSC	2	70	-0.851120411139552
LUSC	13	195	-0.149810560797657
LUSC	11	321	0.489619008631718
LUSC	13	368	0.742296822357842
LUSC	32	208	0.0152035216357302
OV	6	519	0.213112807242949
OV	2	44	-1.43738613076456
OV	32	225	-0.710339625713235
OV	13	268	-0.627642392911188
OV	9	449	-0.0177503009960966
OV	9	203	-0.865396937217071
OV	11	208	-0.841276910983141
OV	23	580	0.4818788138496
OV	25	330	-0.372659258438212
OV	17	460	0.0477183416388567
UCEC	10	810	3.35440779384285
LIHC	5	59	-0.648272876115892
LIHC	11	24	-0.932328137317404
LIHC	12	103	-0.148727416761509
THYM	5	44	0.257518262390639
THYM	0	47	0.18840080668406
BRCA	3	47	-0.85488561284171
BRCA	4	38	-0.896371607441854
COAD	12	210	0.879311311669112
COAD	2	21	-1.01279474488275
COAD	22	138	0.289810932240894
BLCA	11	138	-0.355663971231604
BLCA	12	127	-0.412554815868759
KIRP	7	50	-0.138747313371471
KIRP	2	63	-0.00534749280710606
KIRP	2	41	-0.372196999359111
KIRP	9	44	-0.205447223653654
KIRP	2	239	2.92944855960893
KIRP	7	39	-0.322172066647474
KIRP	7	42	-0.272147133935837
KIRP	9	65	0.144727305327805
KIRP	13	39	-0.2221222012242
KIRP	7	47	-0.188772246083108
KIRP	6	27	-0.538946775064567
KIRP	24	110	1.14522595956054
KIRP	1	23	-0.689021573199478
KIRP	5	22	-0.638996640487841
KIRP	4	32	-0.48892184235293
KIRP	0	33	-0.538946775064567
KIRP	32	79	0.761701475437995
LIHC	13	51	-0.648272876115892
LIHC	2	21	-1.04986824540079
LIHC	3	71	-0.550322786046405
UCEC	2	21	-0.718619154114025
BRCA	14	217	0.0837350149865288
THYM	8	243	7.23838128875505
THYM	4	15	-0.779243573208037
THYM	0	36	-0.191745199702121
THYM	0	42	0.0156071674176145
OV	19	308	-0.469139363373933
LUSC	30	225	0.0925538727763804
LUSC	12	64	-0.830493650835379
LUSC	0	34	-1.0470746340292
LUSC	9	294	0.340074996426461
LUSC	4	129	-0.536562316500908
LUSC	1	106	-0.670636258478035
LUSC	12	400	0.902154214715186
LUSC	11	184	-0.21684753178622
LUSC	23	185	-0.149810560797657
LUSC	1	69	-0.861433791291639
LUSC	15	276	0.278194715513941
LUSC	24	280	0.345231686502504
LUSC	11	85	-0.727359849314512
LUSC	11	220	-0.0312066890486599
LUSC	11	197	-0.149810560797657
LUSC	1	105	-0.675792948554078
LUSC	0	38	-1.02644787372503
LUSC	32	289	0.432895417795241
LUSC	2	116	-0.613912667641558
LUSC	12	120	-0.541719006576951
LUSC	19	372	0.793863723118276
LUSC	17	269	0.252411265133724
LUSC	12	134	-0.469525345512344
LUSC	3	94	-0.722203159238468
LUSC	21	232	0.0822404926242937
OV	0	43	-1.44772328486481
OV	10	405	-0.165916176433096
OV	21	687	0.843679207358553
OV	13	232	-0.751688242114258
OV	4	512	0.182101344942182
OV	8	490	0.120078420340647
OV	18	272	-0.596630930610421
OV	33	254	-0.606968084710677
OV	12	291	-0.551836596175979
OV	10	363	-0.310636333836677
OV	14	275	-0.600076648643839
OV	2	503	0.144198446574577
OV	10	528	0.257907141677391
OV	14	352	-0.334756360070607
OV	11	677	0.774764846690181
OV	11	229	-0.768916832281351
OV	14	529	0.275135731844484
OV	9	337	-0.403670720738979
OV	8	177	-0.958431324119373
OV	10	357	-0.331310642037189
OV	20	240	-0.700002471612979
OV	25	283	-0.534608006008886
OV	18	329	-0.400225002705561
OV	7	469	0.0442726236054381
OV	6	455	-0.00741314689584081
OV	15	483	0.120078420340647
OV	12	250	-0.693111035546142
OV	19	306	-0.47603079944077
OV	2	497	0.123524138374066
OV	3	841	1.31229685990348
OV	1	1021	1.92563466985199
OV	15	421	-0.0935560977313057
OV	25	90	-1.19963158645868
OV	7	243	-0.734459651947165
OV	3	885	1.4639084533739
OV	10	220	-0.803374012615537
OV	14	226	-0.768916832281351
OV	12	404	-0.162470458399678
OV	12	182	-0.927419861818606
OV	16	453	0.020152597371508
OV	24	221	-0.751688242114258
OV	1	67	-1.36158033402935
OV	9	376	-0.269287717435654
OV	25	412	-0.0901103796978871
OV	20	345	-0.338202078104026
OV	0	263	-0.689665317512723
OV	9	185	-0.927419861818606
OV	1	60	-1.38570036026328
OV	8	506	0.175209908875345
OV	22	189	-0.86884265525049
OV	13	422	-0.0970018157647243
OV	22	299	-0.489813671574444
OV	24	599	0.550793174517972
OV	16	341	-0.365767822371375
OV	13	422	-0.0970018157647243
OV	25	221	-0.748242524080839
OV	5	392	-0.227939101034631
OV	8	420	-0.121121841998655
OV	13	236	-0.737905369980583
OV	7	305	-0.520825133875212
OV	22	232	-0.72067677981349
LUAD	14	218	0.492531979324672
LUAD	6	89	-0.532717347513365
LUAD	8	94	-0.480332345412152
LUAD	11	84	-0.532717347513365
LUAD	17	102	-0.35311162602349
LUAD	16	93	-0.427947343310938
LUAD	13	381	1.70487059938133
LUAD	10	114	-0.315693767379766
LUAD	15	75	-0.570135206157089
LUAD	8	206	0.357827688207265
LUAD	7	105	-0.405496628124704
LUAD	10	91	-0.487815917140897
LUAD	7	56	-0.772191642833199
LUAD	21	155	0.0734519625149631
LUAD	18	142	-0.0462851851449536
LUAD	13	63	-0.674905210359516
LUSC	21	345	0.664946471217192
LUSC	16	311	0.463835558251501
LUSC	7	156	-0.381861614219608
[truncated: 8,637 more rows]
