# Supplementary material for: CNApp, a tool for the quantification of copy number alterations and integrative analysis revealing clinical implications
Source: eLife. 2020 Jan 15;9:e50267. doi: 10.7554/eLife.50267 (PMC7010409; doi:10.7554/eLife.50267)
Supplement: Figure 4—figure supplement 1—source data 1. [file elife-50267-fig4-figsupp1-data1.xlsx]

## Sheet: Franch-Exposito et al_Supplemen
Source data 4: FCS by CMS sample group.
cms_label	FCS
CMS1	7
CMS1	11
CMS1	7
CMS1	13
CMS1	2
CMS1	9
CMS1	10
CMS1	9
CMS1	4
CMS1	11
CMS1	10
CMS1	51
CMS1	20
CMS1	11
CMS1	109
CMS1	5
CMS1	18
CMS1	17
CMS1	139
CMS1	3
CMS1	12
CMS1	35
CMS1	10
CMS1	8
CMS1	16
CMS1	54
CMS1	26
CMS1	77
CMS1	48
CMS1	22
CMS1	8
CMS1	31
CMS1	45
CMS1	17
CMS1	12
CMS1	9
CMS1	8
CMS1	28
CMS1	12
CMS1	10
CMS1	22
CMS1	11
CMS1	9
CMS1	14
CMS1	15
CMS1	10
CMS1	1
CMS1	4
CMS1	13
CMS1	8
CMS1	11
CMS1	3
CMS1	9
CMS1	9
CMS1	6
CMS1	7
CMS1	15
CMS1	85
CMS1	2
CMS1	11
CMS1	119
CMS1	17
CMS1	3
CMS1	15
CMS2	67
CMS2	29
CMS2	69
CMS2	20
CMS2	82
CMS2	71
CMS2	60
CMS2	32
CMS2	36
CMS2	35
CMS2	106
CMS2	11
CMS2	35
CMS2	35
CMS2	42
CMS2	46
CMS2	34
CMS2	40
CMS2	19
CMS2	3
CMS2	34
CMS2	210
CMS2	96
CMS2	93
CMS2	109
CMS2	45
CMS2	84
CMS2	37
CMS2	16
CMS2	49
CMS2	178
CMS2	71
CMS2	28
CMS2	11
CMS2	40
CMS2	48
CMS2	29
CMS2	22
CMS2	26
CMS2	20
CMS2	33
CMS2	99
CMS2	32
CMS2	112
CMS2	24
CMS2	59
CMS2	39
CMS2	57
CMS2	168
CMS2	9
CMS2	61
CMS2	20
CMS2	18
CMS2	85
CMS2	36
CMS2	45
CMS2	36
CMS2	15
CMS2	116
CMS2	48
CMS2	19
CMS2	94
CMS2	66
CMS2	78
CMS2	79
CMS2	91
CMS2	59
CMS2	55
CMS2	69
CMS2	33
CMS2	99
CMS2	45
CMS2	17
CMS2	45
CMS2	25
CMS2	6
CMS2	26
CMS2	87
CMS2	69
CMS2	10
CMS2	11
CMS2	17
CMS2	19
CMS2	45
CMS2	75
CMS2	26
CMS2	55
CMS2	6
CMS2	32
CMS2	59
CMS2	105
CMS2	36
CMS2	44
CMS2	41
CMS2	9
CMS2	70
CMS2	65
CMS2	101
CMS2	55
CMS2	5
CMS2	77
CMS2	62
CMS2	51
CMS2	8
CMS2	37
CMS2	18
CMS2	10
CMS2	52
CMS2	74
CMS2	61
CMS2	9
CMS2	38
CMS3	5
CMS3	18
CMS3	48
CMS3	36
CMS3	83
CMS3	35
CMS3	21
CMS3	11
CMS3	23
CMS3	77
CMS3	20
CMS3	27
CMS3	32
CMS3	1
CMS3	8
CMS3	10
CMS3	75
CMS3	2
CMS3	12
CMS3	88
CMS3	12
CMS3	20
CMS3	5
CMS3	16
CMS3	8
CMS3	11
CMS3	34
CMS3	6
CMS3	16
CMS3	31
CMS3	13
CMS3	9
CMS3	35
CMS3	2
CMS3	20
CMS3	63
CMS3	18
CMS3	22
CMS3	12
CMS3	85
CMS3	48
CMS3	20
CMS3	17
CMS3	13
CMS3	3
CMS3	5
CMS3	5
CMS3	66
CMS3	10
CMS3	21
CMS3	10
CMS4	56
CMS4	137
CMS4	44
CMS4	27
CMS4	51
CMS4	152
CMS4	33
CMS4	40
CMS4	15
CMS4	34
CMS4	36
CMS4	10
CMS4	50
CMS4	4
CMS4	14
CMS4	142
CMS4	14
CMS4	10
CMS4	16
CMS4	25
CMS4	14
CMS4	59
CMS4	41
CMS4	10
CMS4	8
CMS4	2
CMS4	109
CMS4	56
CMS4	174
CMS4	126
CMS4	12
CMS4	78
CMS4	54
CMS4	82
CMS4	43
CMS4	17
CMS4	99
CMS4	183
CMS4	80
CMS4	30
CMS4	46
CMS4	8
CMS4	67
CMS4	57
CMS4	11
CMS4	41
CMS4	27
CMS4	86
CMS4	58
CMS4	37
CMS4	37
CMS4	6
CMS4	11
CMS4	18
CMS4	6
CMS4	17
CMS4	23
CMS4	32
CMS4	77
CMS4	15
CMS4	37
CMS4	63
CMS4	51
CMS4	28
CMS4	59
CMS4	19
CMS4	29
CMS4	89
CMS4	96
CMS4	71
CMS4	17
CMS4	19
CMS4	12
CMS4	82
CMS4	59
CMS4	43
CMS4	7
CMS4	2
CMS4	59
CMS4	66
CMS4	6
CMS4	30
