# Supplementary material for: CNApp, a tool for the quantification of copy number alterations and integrative analysis revealing clinical implications
Source: eLife. 2020 Jan 15;9:e50267. doi: 10.7554/eLife.50267 (PMC7010409; doi:10.7554/eLife.50267)
Supplement: Figure 4—source data 1. [file elife-50267-fig4-data1.xlsx]

## Sheet: Franch-Exposito et al_Fig_4B-so
Source data 3: BCS by CMS sample group.
cms_label	BCS
CMS1	1
CMS1	1
CMS1	1
CMS1	1
CMS1	1
CMS1	1
CMS1	2
CMS1	0
CMS1	0
CMS1	0
CMS1	0
CMS1	2
CMS1	0
CMS1	0
CMS1	7
CMS1	2
CMS1	1
CMS1	2
CMS1	9
CMS1	0
CMS1	4
CMS1	0
CMS1	1
CMS1	0
CMS1	2
CMS1	8
CMS1	0
CMS1	0
CMS1	1
CMS1	2
CMS1	0
CMS1	2
CMS1	2
CMS1	7
CMS1	1
CMS1	4
CMS1	0
CMS1	4
CMS1	1
CMS1	2
CMS1	1
CMS1	8
CMS1	1
CMS1	3
CMS1	0
CMS1	1
CMS1	0
CMS1	1
CMS1	0
CMS1	3
CMS1	2
CMS1	0
CMS1	2
CMS1	0
CMS1	1
CMS1	0
CMS1	6
CMS1	14
CMS1	0
CMS1	1
CMS1	4
CMS1	1
CMS1	0
CMS1	1
CMS2	7
CMS2	15
CMS2	10
CMS2	19
CMS2	17
CMS2	10
CMS2	24
CMS2	6
CMS2	12
CMS2	19
CMS2	9
CMS2	6
CMS2	13
CMS2	17
CMS2	15
CMS2	6
CMS2	8
CMS2	4
CMS2	10
CMS2	14
CMS2	17
CMS2	19
CMS2	9
CMS2	17
CMS2	10
CMS2	16
CMS2	14
CMS2	12
CMS2	11
CMS2	12
CMS2	14
CMS2	22
CMS2	7
CMS2	0
CMS2	21
CMS2	17
CMS2	7
CMS2	12
CMS2	16
CMS2	13
CMS2	6
CMS2	12
CMS2	9
CMS2	16
CMS2	12
CMS2	14
CMS2	18
CMS2	16
CMS2	7
CMS2	2
CMS2	13
CMS2	12
CMS2	11
CMS2	10
CMS2	11
CMS2	24
CMS2	10
CMS2	6
CMS2	8
CMS2	17
CMS2	14
CMS2	18
CMS2	16
CMS2	9
CMS2	26
CMS2	13
CMS2	14
CMS2	12
CMS2	22
CMS2	13
CMS2	22
CMS2	10
CMS2	3
CMS2	17
CMS2	9
CMS2	3
CMS2	11
CMS2	17
CMS2	19
CMS2	1
CMS2	18
CMS2	7
CMS2	11
CMS2	18
CMS2	11
CMS2	14
CMS2	12
CMS2	15
CMS2	14
CMS2	7
CMS2	21
CMS2	10
CMS2	13
CMS2	12
CMS2	10
CMS2	11
CMS2	12
CMS2	7
CMS2	11
CMS2	6
CMS2	9
CMS2	13
CMS2	9
CMS2	4
CMS2	20
CMS2	11
CMS2	12
CMS2	14
CMS2	14
CMS2	22
CMS2	18
CMS2	19
CMS3	0
CMS3	4
CMS3	9
CMS3	7
CMS3	18
CMS3	4
CMS3	3
CMS3	6
CMS3	17
CMS3	6
CMS3	17
CMS3	5
CMS3	11
CMS3	0
CMS3	0
CMS3	8
CMS3	7
CMS3	0
CMS3	1
CMS3	8
CMS3	4
CMS3	8
CMS3	0
CMS3	3
CMS3	3
CMS3	5
CMS3	6
CMS3	0
CMS3	0
CMS3	7
CMS3	2
CMS3	0
CMS3	8
CMS3	1
CMS3	9
CMS3	10
CMS3	10
CMS3	22
CMS3	2
CMS3	16
CMS3	2
CMS3	7
CMS3	4
CMS3	0
CMS3	0
CMS3	0
CMS3	6
CMS3	4
CMS3	0
CMS3	9
CMS3	0
CMS4	23
CMS4	7
CMS4	16
CMS4	5
CMS4	8
CMS4	15
CMS4	22
CMS4	13
CMS4	3
CMS4	6
CMS4	8
CMS4	0
CMS4	11
CMS4	0
CMS4	2
CMS4	21
CMS4	18
CMS4	7
CMS4	2
CMS4	8
CMS4	2
CMS4	10
CMS4	3
CMS4	7
CMS4	0
CMS4	7
CMS4	29
CMS4	14
CMS4	13
CMS4	19
CMS4	0
CMS4	8
CMS4	17
CMS4	10
CMS4	11
CMS4	8
CMS4	9
CMS4	6
CMS4	11
CMS4	11
CMS4	10
CMS4	0
CMS4	17
CMS4	9
CMS4	0
CMS4	10
CMS4	9
CMS4	7
CMS4	11
CMS4	8
CMS4	2
CMS4	0
CMS4	5
CMS4	5
CMS4	5
CMS4	10
CMS4	12
CMS4	7
CMS4	13
CMS4	7
CMS4	10
CMS4	9
CMS4	4
CMS4	13
CMS4	16
CMS4	8
CMS4	12
CMS4	11
CMS4	23
CMS4	1
CMS4	5
CMS4	6
CMS4	0
CMS4	10
CMS4	6
CMS4	7
CMS4	12
CMS4	0
CMS4	13
CMS4	6
CMS4	1
CMS4	10
