# Supplementary material for: CNApp, a tool for the quantification of copy number alterations and integrative analysis revealing clinical implications
Source: eLife. 2020 Jan 15;9:e50267. doi: 10.7554/eLife.50267 (PMC7010409; doi:10.7554/eLife.50267)
Supplement: Supplementary file 1. — This table displays the comparison between GISTIC and CNApp in terms of broad CNAs by dividing the genome in chromosome arms. First set of columns shows GISTIC frequencies of amplifications (Amp_Freq) and deletions (Del_Freq) with a threshold set at |0.1|. Remaining columns include results from CNApp, using different parameters. CNApp default CNA thresholds are |0.2|, whereas CNApp relaxed CNA thresholds were dropped to |0.1|. CNApp resegmentation parameters (reseg) are indicated accordingly. (XLSX 15 KB) [file elife-50267-supp1.xlsx]

## Sheet: Sheet1
Table S1. Comparative analysis of broad CNA frequencies between CNApp and GISTIC2.0
	GISTIC2.0 (reported parameters)1				CNApp
					reseg&default parameters2		reseg&relaxed parameters3		reseg 70% arm&default parameters		reseg 40% arm&default parameters		skip reseg&default parameters
Chromosome arm	Amp_Freq (%)4	Amp Q value5	Del_Freq (%)6	Del Q value	Amp_Freq (%)	Del_Freq (%)	Amp_Freq (%)	Del_Freq (%)	Amp_Freq (%)	Del_Freq (%)	Amp_Freq (%)	Del_Freq (%)	Amp_Freq (%)	Del_Freq (%)
8p	23	0.502	70	0	4.59459	61.6216	8.37838	63.7838	5.94595	48.3784	4.59	64.32	4.59	50.54
17p	11	1	56	0	3.78378	47.027	7.02703	53.2432	5.94595	34.3243	2.97	50.54	3.24	41.35
16q	7	1	41	0	3.24324	31.0811	8.10811	39.1892	2.97297	28.9189	3.51	33.51	3.24	28.65
4q	2	1	41	0	2.43243	32.973	5.13514	43.5135	2.43243	28.3784	2.43	32.97	1.35	23.78
8q	52	0	36	6.19e-10	46.4865	4.59459	53.7838	6.21622	38.1081	5.13514	52.7	4.59	28.65	4.86
13q	9	1	35	6.19e-14	3.51351	25.4054	8.91892	32.4324	0.810811	17.5676	3.78	30.27	2.43	18.65
6q	20	1	34	2.38e-11	10.2703	24.3243	17.5676	30.8108	10	19.4595	9.73	25.68	8.92	19.46
9p	8	1	34	8.01e-11	4.59459	20	9.45946	32.1622	3.24324	15.6757	5.14	22.16	3.78	18.38
16p	12	1	32	1.2e-09	6.21622	20.8108	14.3243	27.8378	5.40541	19.4595	6.76	21.08	5.95	19.46
21q	10	1	32	2.95e-08	4.05405	19.4595	11.0811	28.9189	4.05405	17.8378	4.32	20.54	4.05	17.84
4p	8	1	32	4.76e-08	7.2973	16.4865	14.8649	26.4865	7.02703	15.4054	8.38	17.03	6.22	14.05
9q	7	1	32	1.82e-09	3.78378	17.8378	9.18919	30	3.24324	15.1351	4.05	19.19	3.24	14.86
14q	8	1	31	6.19e-10	4.05405	17.027	10	25.9459	3.24324	11.0811	4.32	21.08	2.97	13.24
1q	61	0	30	2.19e-05	55.6757	0.27027	61.3514	1.08108	45.9459	0.27027	60.54	0.81	40.81	0.27
1p	17	1	29	1.69e-07	12.1622	15.1351	18.1081	24.3243	11.3514	12.1622	13.24	17.3	10	9.19
10q	12	1	24	0.0254	6.75676	11.8919	14.0541	20.2703	6.48649	8.37838	6.76	14.59	6.22	8.92
18p	11	1	23	0.217	8.10811	13.5135	17.8378	20.8108	7.56757	12.7027	8.38	14.59	8.11	12.97
18q	10	1	23	0.137	5.67568	17.2973	14.5946	25.6757	5.40541	14.8649	5.68	18.38	5.95	15.14
22q	16	1	22	0.217	7.2973	10.2703	20	17.027	6.48649	8.91892	8.38	11.62	6.49	8.38
11q	6	1	21	0.203	4.59459	13.7838	10.8108	23.7838	4.59459	9.45946	5.41	14.05	4.05	10.27
12p	13	1	20	0.675	5.94595	12.7027	14.8649	20.2703	4.86486	9.45946	5.95	13.78	5.41	11.62
15q	11	1	20	0.47	4.32432	9.45946	13.7838	17.8378	3.78378	7.2973	4.59	10.81	3.51	7.84
10p	15	1	18	1	12.973	5.67568	23.2432	12.1622	12.1622	4.59459	13.24	5.68	11.62	4.86
11p	6	1	18	1	6.21622	7.83784	15.1351	17.8378	5.13514	6.75676	6.49	7.84	5.41	7.3
6p	31	6.08e-08	17	1	29.1892	1.89189	40.8108	4.32432	25.6757	1.62162	31.62	2.43	24.32	1.35
17q	27	0.000161	17	1	22.4324	4.32432	33.5135	9.18919	17.5676	4.59459	25.41	4.32	18.38	3.78
19p	17	1	17	1	8.91892	10.5405	16.7568	15.9459	7.2973	5.67568	8.38	13.51	8.11	8.92
3p	10	1	16	1	7.83784	7.02703	16.7568	17.5676	6.21622	5.40541	10.27	7.57	7.57	5.95
5p	38	1.52e-15	15	1	26.4865	1.35135	43.5135	4.59459	24.3243	1.08108	29.19	1.62	24.05	1.08
5q	32	1.77e-10	15	1	22.1622	4.59459	38.3784	9.45946	19.4595	2.97297	22.97	5.68	17.03	4.05
19q	20	0.705	15	1	12.7027	4.59459	22.4324	8.37838	11.3514	2.97297	12.97	4.59	12.43	4.32
3q	10	1	14	1	8.91892	3.51351	19.1892	12.1622	6.75676	2.97297	9.73	4.32	7.57	3.24
2q	12	1	12	1	7.02703	3.78378	17.8378	11.6216	5.94595	2.7027	7.84	4.32	6.22	2.7
12q	14	1	11	1	8.64865	4.32432	19.1892	11.3514	6.75676	3.24324	8.11	4.59	7.84	4.32
2p	12	1	11	1	7.56757	2.43243	18.6486	10	5.94595	2.43243	8.92	2.97	7.03	1.89
20p	31	5.11e-07	10	1	22.4324	3.51351	37.5676	6.48649	20.8108	3.24324	22.7	4.59	21.62	2.97
7q	31	4.46e-09	8	1	26.2162	3.78378	40	7.2973	23.2432	3.24324	27.57	3.78	24.05	4.05
7p	30	3.06e-06	8	1	26.7568	2.7027	43.2432	4.32432	23.5135	2.43243	27.03	2.7	25.41	2.43
20q	31	6.08e-08	5	1	23.5135	0.810811	39.1892	3.51351	22.4324	0.540541	25.14	1.08	21.35	0.54
(1) GISTIC reported parameters: amp 0.1/del -0.1
(2) CNApp default parameters: amp 0.2/del -0.2
(3) CNApp relaxed parameters: amp 0.1/del -0.1
(4) Frequency of amplification
(5) Significant Q value: 0.25
(6) Frequency of deletion
